# Supplementary material for: Theoretical view on a linear end-on manganese–dioxygen complex bearing a calix[4]arene ligand
Source: Royal Society of Chemistry journal article supplement (doi:10.1039/c6ra11199h), 2016-01-01
Supplement: c6ra11199h1.pdf [file c6ra11199h1.pdf]

Electronic Supplementary Information for:

Theoretical View on a Linear End-on Manganese-Dioxygen  
Complex Bearing a Calix[4]arene Ligand †

*Xiang-Cui Huang,<sup>a</sup> Hui-Fang Wang,<sup>\*a</sup> Jian-Ping Lang<sup>\*ab</sup>*

<sup>a</sup>College of Chemistry, Chemical Engineering and Materials Science, Soochow University, Suzhou 215123, People's Republic of China.

<sup>b</sup>State Key Laboratory of Organometallic Chemistry, Shanghai Institute of Organic Chemistry, Chinese Academy of Sciences, Shanghai 200032, People's Republic of China

**Corresponding Author**

\*E-mail: [wanghf@suda.edu.cn](mailto:wanghf@suda.edu.cn), [jplang@suda.edu.cn](mailto:jplang@suda.edu.cn).

## Table of Contents

|                                                                                                                                                                                                                                                                                                                                                                                                                                                               |     |
|---------------------------------------------------------------------------------------------------------------------------------------------------------------------------------------------------------------------------------------------------------------------------------------------------------------------------------------------------------------------------------------------------------------------------------------------------------------|-----|
| <b>Table S1.</b> Experimental and calculated structural parameters (angle in degrees and bond distances in Å) of sextet $[\text{MnL}(\text{O}_2)(\text{H}_2\text{O})]^{2+}$ with different functional at B1 level. ....                                                                                                                                                                                                                                       | S3  |
| <b>Table S2.</b> Optimized structural parameters (angle in degrees and bond distances in Å) of sextet $[\text{MnL}(\text{O}_2)(\text{H}_2\text{O})]^{2+}$ under different basis set levels. ....                                                                                                                                                                                                                                                              | S4  |
| <b>Table S3.</b> Optimized structural parameters (bond distances in Å and angles in degrees) of sextet $[\text{MnL}(\text{O}_2)(\text{H}_2\text{O})]^{2+}$ - $n\text{H}_2\text{O}$ complex at B3LYP/B1 level. ....                                                                                                                                                                                                                                            | S5  |
| <b>Table S4.</b> Calculated structural parameters (bond distances in Å and angles in degrees) of sextet $[\text{MnL}(\text{O}_2)(\text{H}_2\text{O})]^{2+}$ - $8\text{H}_2\text{O}$ complex at different basis set levels using B3LYP method and in CPCM model with water as solvent (*). ....                                                                                                                                                                | S5  |
| <b>Table S5.</b> Relevant natural bond orbitals of Mn 3d orbitals and $\text{O}_2$ lone pair orbitals and their occupation numbers in both $\alpha$ and $\beta$ spaces. ....                                                                                                                                                                                                                                                                                  | S6  |
| <b>Table S6</b> Mulliken spin populations on Mn- $\text{O}_2$ unit (e.g., $S_{\text{Mn}}$ ) and Wiberg bond indices (e.g., $B_{\text{O}_1-\text{O}_2}$ ) of $[\text{MnL}(\text{O}_2)(\text{H}_2\text{O})]^{2+}$ - $n\text{H}_2\text{O}$ complexes. The results of $[\text{MnL}(\text{O}_2)(\text{H}_2\text{O})]^{2+}$ - $8\text{H}_2\text{O}$ in CPCM model is based on B3LYP/B2 method. ....                                                                 | S13 |
| <b>Fig. S1</b> View of the bowl-shaped cationic structure of $[\text{MnL}(\text{O}_2)(\text{H}_2\text{O})](\text{PF}_6)_2$ with 50% thermal ellipsoids. ....                                                                                                                                                                                                                                                                                                  | S14 |
| <b>Fig. S2.</b> Potential energy surface of three binding configurations of $S=5/2$ . ....                                                                                                                                                                                                                                                                                                                                                                    | S15 |
| <b>Fig. S3.</b> Linear relationship of Mn- $\text{O}_2$ - $\text{O}_1$ ( $\angle\text{MnO}_2\text{O}_1$ ) bonding angle of optimized sextet $[\text{MnL}(\text{O}_2)(\text{H}_2\text{O})]^{2+}$ - $n\text{H}_2\text{O}$ ( $n=0,1,4,6,8$ ) with $d_{\text{C}(\text{N})-\text{C}(\text{N})}$ ( $R^2=0.713$ ). ....                                                                                                                                              | S15 |
| <b>Fig. S4.</b> Optimized structure of $[\text{MnL}^{\text{-S}}(\text{O}_2)(\text{H}_2\text{O})]^{2+}$ complex (a) side view and (b) top view. The distances of $\text{O}_{\text{e}1}$ - $\text{O}_{\text{e}3}$ and $\text{O}_{\text{e}2}$ - $\text{O}_{\text{e}4}$ are 3.829 Å and 4.125 Å, respectively. ....                                                                                                                                               | S16 |
| <b>Fig. S5.</b> NBOs of superoxo donors (left) and Mn(III) acceptors (right) for sextet $[\text{MnL}(\text{O}_2)(\text{H}_2\text{O})]^{2+}$ in three different binding configurations (a-c) and $[\text{MnL}(\text{O}_2)(\text{H}_2\text{O})]^{2+}$ - $n\text{H}_2\text{O}$ ( $n = 1, 4, 6, 8$ ) complexes (d-g), as well as second-order perturbation energies ( $\Delta E_{i \rightarrow j}$ in kcal/mol). All hydrogen atoms are omitted for clarity. .... | S18 |
| <b>Fig. S6.</b> HOMO of the sextet bent end-on $[\text{MnL}(\text{O}_2)(\text{H}_2\text{O})]^{2+}$ in $\beta$ space, corresponding to a bonding interaction of superoxo $\pi^*_{\text{ip}}$ with Mn 3 $d_{z^2}$ . ....                                                                                                                                                                                                                                        | S18 |

## Cartesian coordinates of all structures described in this work.

**Table S1** Experimental and calculated structural parameters (angle in degrees and bond distances in Å) of sextet [MnL(O<sub>2</sub>)(H<sub>2</sub>O)]<sup>2+</sup> with different functional at B1 level.<sup>a</sup>

| Method      | Mn-O2-O1 | O2-Mn-O <sub>w</sub> | <i>d</i> <sub>O1-O2</sub> | <i>d</i> <sub>Mn-O2</sub> | <i>d</i> <sub>Mn-O<sub>w</sub></sub> | <i>d</i> <sub>O<sub>e</sub>-O<sub>e</sub></sub> | <i>d</i> <sub>Mn-O<sub>e</sub></sub> | RMSD <sup>b</sup> |
|-------------|----------|----------------------|---------------------------|---------------------------|--------------------------------------|-------------------------------------------------|--------------------------------------|-------------------|
| <i>Exp.</i> | 180.0°   | 180.0°               | 1.249                     | 2.444                     | 2.210                                | 3.773                                           | 1.887                                |                   |
| wB97X-D     | 129.9°   | 170.1°               | 1.308                     | 2.229                     | 2.293                                | 3.828                                           | 1.915                                | 0.110             |
| B3LYP       | 129.3°   | 170.6°               | 1.321                     | 2.245                     | 2.335                                | 3.858                                           | 1.928                                | 0.118             |
| B97-D       | 128.6°   | 171.6°               | 1.300                     | 2.299                     | 2.288                                | 3.985                                           | 1.993                                | 0.131             |
| M06-2X      | 127.6°   | 170.3°               | 1.309                     | 2.199                     | 2.243                                | 3.852                                           | 1.927                                | 0.120             |
| TPSSh       | 126.6°   | 169.2°               | 1.323                     | 2.202                     | 2.325                                | 3.845                                           | 1.924                                | 0.129             |
| BP86        | 125.8°   | 169.9°               | 1.323                     | 2.269                     | 2.362                                | 3.867                                           | 1.934                                | 0.119             |
| B3LYP-D3    | 128.2°   | 169.4°               | 1.321                     | 2.268                     | 2.310                                | 3.854                                           | 1.928                                | 0.104             |

<sup>a</sup>B1: polarized triple- $\zeta$  basis sets 6-311+G(d) for Mn, O atoms and polarized double- $\zeta$  basis sets 6-31G(d) for C, N, H atoms.

<sup>b</sup>RMSD: the root-mean-square deviation of the key bond distances as relative to the experimental parameters is calculated by eq. 1.

$$RMSD = \sqrt{\frac{\sum_1^5 (d_{i(cal.)} - d_{i(Exp.)})^2}{5}} \quad (\text{eq. 1})$$

Here the  $d_{i(cal.)}$  and  $d_{i(Exp.)}$  correspond to the five key bond distances listed in Tables from calculations (cal.) and experiments (Exp.).

**Table S2** Optimized structural parameters (angle in degrees and bond distances in Å) of sextet  $[\text{MnL}(\text{O}_2)(\text{H}_2\text{O})]^{2+}$  under different basis set levels.

| Method   | Mn-O2-O1 | O2-Mn-O <sub>w</sub> | $d_{\text{O1-O2}}$ | $d_{\text{Mn-O2}}$ | $d_{\text{Mn-O}_w}$ | $d_{\text{O}_e\text{-O}_e}$ | $d_{\text{Mn-O}_e}$ | RMSD  |
|----------|----------|----------------------|--------------------|--------------------|---------------------|-----------------------------|---------------------|-------|
| B3LYP/B1 | 129.3°   | 170.6°               | 1.321              | 2.245              | 2.335               | 3.858                       | 1.928               | 0.118 |
| B3LYP/B2 | 129.3°   | 170.4°               | 1.321              | 2.244              | 2.358               | 3.855                       | 1.928               | 0.123 |
| B3LYP/B3 | 129.2°   | 170.3°               | 1.320              | 2.263              | 2.335               | 3.872                       | 1.936               | 0.115 |
| B3LYP/B4 | 130.7°   | 167.6°               | 1.319              | 2.271              | 2.357               | 3.851                       | 1.927               | 0.113 |
| B3LYP/B5 | 128.7°   | 171.7°               | 1.321              | 2.238              | 2.331               | 3.857                       | 1.929               | 0.119 |
| B3LYP/B6 | 123.5°   | 168.3°               | 1.323              | 2.181              | 2.348               | 3.837                       | 1.920               | 0.140 |
| B3LYP/B7 | 122.8°   | 167.0°               | 1.321              | 2.209              | 2.368               | 3.854                       | 1.929               | 0.137 |

B1: 6-311+G(d) for Mn, O atoms, 6-31G(d) for C, H, N atoms;

B2: 6-311+G(d) for Mn, O atoms, 6-31G(d, p) for C, H, N atoms;

B3: LanL2DZ for Mn atom, 6-311+G(d) for O atoms, 6-31G(d) for C, H, N atoms;

B4: LanL2DZ for Mn atom, 6-311+G (d) for O1, O2 atom, 6-31G(d) for the rest atoms;

B5: 6-311+G(d) for Mn, O atoms, 6-31G+(d) for C, H, N atoms;

B6: 6-31G(d) for the whole system;

B7: LanL2DZ for Mn atom, 6-31G(d) for the rest.

**Table S3** Optimized structural parameters (bond distances in Å and angles in degrees) of sextet  $[\text{MnL}(\text{O}_2)(\text{H}_2\text{O})]^{2+} - n\text{H}_2\text{O}$  complex at B3LYP/B1 level. The stretching vibration frequencies of dioxygen ligand ( $\nu_{\text{O1-O2}}$ ) were scaled by 0.946.

|                                      | $n = 1$ | $n = 4$ | $n = 6$ | $n = 8$ | $n = 8(\text{B3LYP-D3})$ |
|--------------------------------------|---------|---------|---------|---------|--------------------------|
| $\nu_{\text{O1-O2}}/\text{cm}^{-1}$  | 1151.4  | 1156.2  | 1156.5  | 1160.3  | 1173.9                   |
| $\angle \text{MnO2O1}$               | 132.1°  | 140.5°  | 150.6°  | 162.6°  | 156.4°                   |
| $\angle \text{O2MnO}_w$              | 178.9°  | 171.0°  | 172.5°  | 174.9°  | 172.9°                   |
| $d_{\text{O1-O2}}/\text{Å}$          | 1.322   | 1.325   | 1.324   | 1.325   | 1.321                    |
| $d_{\text{Mn-O2}}/\text{Å}$          | 2.366   | 2.458   | 2.462   | 2.552   | 2.431                    |
| $d_{\text{Mn-O}_w}/\text{Å}$         | 2.300   | 2.262   | 2.265   | 2.234   | 2.224                    |
| $d_{\text{Mn-O}_e}/\text{Å}$         | 1.927   | 1.922   | 1.914   | 1.914   | 1.917                    |
| $d_{\text{O}_e\text{-O}_e}/\text{Å}$ | 3.853   | 3.843   | 3.828   | 3.826   | 3.832                    |
| RMSD                                 | 0.074   | 0.054   | 0.050   | 0.066   | 0.045                    |
| $d_{\text{O1-O2}}/(\text{p})$        | 0.887   | 1.022   | 1.153   | 1.264   | 1.211                    |

**Table S4** Calculated structural parameters (bond distances in Å and angles in degrees) of sextet  $[\text{MnL}(\text{O}_2)(\text{H}_2\text{O})]^{2+} - 8\text{H}_2\text{O}$  complex at different basis set levels using B3LYP method and in CPCM model with water as solvent (\*).

|                              | B2     | B8     | B1*    | B2*    | B8*    |
|------------------------------|--------|--------|--------|--------|--------|
| $\angle \text{MnO2O1}$       | 164.6° | 168.6° | 153.1° | 159.6° | 161.3° |
| $\angle \text{O2MnO}_w$      | 175.7° | 178.4° | 173.0° | 174.2° | 174.9° |
| $d_{\text{O1-O2}}/\text{Å}$  | 1.326  | 1.328  | 1.321  | 1.323  | 1.324  |
| $d_{\text{Mn-O2}}/\text{Å}$  | 2.586  | 2.692  | 2.402  | 2.467  | 2.478  |
| $d_{\text{Mn-O}_w}/\text{Å}$ | 2.245  | 2.226  | 2.325  | 2.333  | 2.311  |

|                                        |       |       |       |       |       |
|----------------------------------------|-------|-------|-------|-------|-------|
| $d_{\text{Mn-O}_e}/\text{\AA}$         | 1.913 | 1.911 | 1.922 | 1.918 | 1.921 |
| $d_{\text{O}_e\text{-O}_e}/\text{\AA}$ | 3.823 | 3.818 | 3.843 | 3.837 | 3.842 |
| <i>RMSD</i>                            | 0.078 | 0.119 | 0.073 | 0.073 | 0.068 |
| $d_{\text{O1-O2(p)}}$                  | 1.278 | 1.302 | 1.179 | 1.240 | 1.254 |

B8: 6-311+G(d) for Mn, O atoms, 6-31G(d, p) for H of the additional waters, and 6-31G(d) for C, N and the rest of H atoms.

**Table S5.** Relevant natural bond orbitals of Mn 3d orbitals and O<sub>2</sub> lone pair orbitals and their occupation numbers (unit: e) in both  $\alpha$  and  $\beta$  spaces. (The subscript ip or op denote orbitals in the plane or out of the plane of MnO2O1)

| <b>[MnL(O<sub>2</sub>)(H<sub>2</sub>O)]<sup>2+</sup></b>                                       |         |                                                                                                |         |                               |
|------------------------------------------------------------------------------------------------|---------|------------------------------------------------------------------------------------------------|---------|-------------------------------|
| $\alpha$                                                                                       |         | $\beta$                                                                                        |         |                               |
|  $3d_{xz}$  | 0.97880 | -                                                                                              | -       | Mn( $\alpha$ - $\beta$ )=3.25 |
|  $3d_{yz}$  | 0.97859 | -                                                                                              | -       |                               |
|  $3d_{z^2}$ | 0.97368 |  $3d_{z^2}$ | 0.22936 |                               |
|  $3d_{xy}$  | 0.97179 |  $3d_{xy}$  | 0.16863 |                               |

|                                                                                                     |         |                                                                                                                |         |                          |
|-----------------------------------------------------------------------------------------------------|---------|----------------------------------------------------------------------------------------------------------------|---------|--------------------------|
| $3d_{x^2-y^2}$                                                                                      | -       | <br>$3d_{x^2-y^2}$<br>$y^2$   | 0.25009 |                          |
| <br>$p_{op}(O2)$   | 0.98792 | <br>$\pi_{op}(O1-O2)$         | 0.98371 | $O_2(\alpha-\beta)=1.17$ |
| <br>$p_{ip}(O2)$   | 0.98883 | <br>$p_{ip}(O2)$              | 0.84316 |                          |
| <br>$p_{op}(O1)$ | 0.99571 | <br>$p_{ip}(O1)$            | 0.96698 |                          |
| <br>$p_{ip}(O1)$ | 0.99011 | <br>$\pi^*_{op}$<br>(O1-O2) | 0.00444 |                          |
| <b>[MnL(O<sub>2</sub>)(H<sub>2</sub>O)]<sup>2+</sup>-1H<sub>2</sub>O</b>                            |         |                                                                                                                |         |                          |
| $\alpha$                                                                                            |         | $\beta$                                                                                                        |         |                          |

|                                                                                                      |         |                                                                                                              |         |                                   |
|------------------------------------------------------------------------------------------------------|---------|--------------------------------------------------------------------------------------------------------------|---------|-----------------------------------|
| 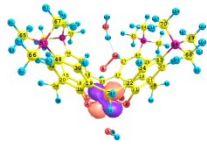<br>$3d_{xz}$       | 0.97880 |                                                                                                              |         | Mn( $\alpha$ - $\beta$ )=3.29     |
| <br>$3d_{yz}$       | 0.97805 |                                                                                                              |         |                                   |
| <br>$3d_{z^2}$      | 0.97553 | <br>$3d_{z^2}$              | 0.19476 |                                   |
| <br>$3d_{xy}$       | 0.97153 | <br>$3d_{xy}$               | 0.17160 |                                   |
| $3d_{x^2-y^2}$                                                                                       |         | <br>$3d_{x^2-y^2}$        | 0.25197 |                                   |
| <br>$p_{op}(O_2)$ | 0.99022 | <br>$\pi_{op}(O$<br>1-O2) | 0.98843 | $O_2$ ( $\alpha$ - $\beta$ )=1.13 |
| <br>$p_{ip}(O_2)$ | 0.99172 | <br>$p_{ip}(O_2)$         | 0.87375 |                                   |



|                                                                                                   |         |                                                                                                          |         |                               |
|---------------------------------------------------------------------------------------------------|---------|----------------------------------------------------------------------------------------------------------|---------|-------------------------------|
| 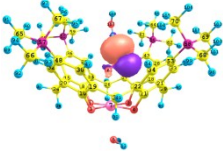<br>$p_{op}(O1)$ | 0.95995 | <br>$p_{ip}(O1)$        | 0.94664 |                               |
| <br>$p_{ip}(O1)$ | 0.99538 | <br>$\pi^*_{op}(O1-O2)$ | 0.00563 |                               |
| <b>[MnL(O<sub>2</sub>)(H<sub>2</sub>O)]<sup>2+</sup>-4H<sub>2</sub>O</b>                          |         |                                                                                                          |         |                               |
| $\alpha$                                                                                          |         | $\beta$                                                                                                  |         |                               |
| <br>$3d_{xz}$  | 0.97669 |                                                                                                          |         | Mn( $\alpha$ - $\beta$ )=3.30 |
| <br>$3d_{yz}$  | 0.97779 |                                                                                                          |         |                               |
| <br>$3d_{z^2}$ | 0.97570 | <br>$3d_{z^2}$        | 0.17059 |                               |
| <br>$3d_{xy}$  | 0.97076 | <br>$3d_{xy}$         | 0.17470 |                               |

|                                                                                                  |         |                                                                                     |         |                          |
|--------------------------------------------------------------------------------------------------|---------|-------------------------------------------------------------------------------------|---------|--------------------------|
| $3d_{x^2-y^2}$                                                                                   |         | 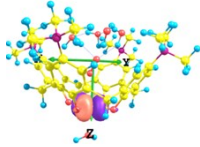   | 0.25324 |                          |
|                                                                                                  |         | $3d_{x^2-y^2}$                                                                      |         |                          |
|  $p_{op}(O2)$   | 0.99058 |    | 0.98950 | $O_2(\alpha-\beta)=1.13$ |
|                                                                                                  |         | $\pi_{op}(O1-O2)$                                                                   |         |                          |
|  $p_{ip}(O2)$   | 0.99186 |    | 0.90642 |                          |
|                                                                                                  |         | $p_{ip}(O2)$                                                                        |         |                          |
|  $p_{op}(O1)$ | 0.98463 |  | 0.95383 |                          |
|                                                                                                  |         | $p_{ip}(O1)$                                                                        |         |                          |
|  $p_{ip}(O1)$ | 0.96325 |                                                                                     |         |                          |
|                                                                                                  |         |                                                                                     |         |                          |
| $[MnL(O_2)(H_2O)]^{2+} \cdot 6H_2O$                                                              |         |                                                                                     |         |                          |
| $\alpha$                                                                                         |         | $\beta$                                                                             |         |                          |

|                                                                                                      |         |                                                                                                            |         |                                            |
|------------------------------------------------------------------------------------------------------|---------|------------------------------------------------------------------------------------------------------------|---------|--------------------------------------------|
| 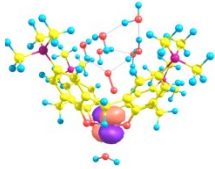<br>$3d_{xz}$       | 0.97735 |                                                                                                            |         | Mn( $\alpha$ - $\beta$ )=3.30              |
| <br>$3d_{yz}$       | 0.97647 |                                                                                                            |         |                                            |
| <br>$3d_{z^2}$      | 0.97485 | <br>$3d_{z^2}$            | 0.16751 |                                            |
| <br>$3d_{xy}$      | 0.97026 | <br>$3d_{xy}$            | 0.17719 |                                            |
| $3d_{x^2-y^2}$                                                                                       |         | <br>$3d_{x^2-y^2}$      | 0.25621 |                                            |
| <br>$p_{op}(O_2)$ | 0.96563 | <br>$\pi_{op}(O_1-O_2)$ | 0.99134 | O <sub>2</sub> ( $\alpha$ - $\beta$ )=1.05 |

|                                                                                                      |         |                                                                                                          |         |                               |
|------------------------------------------------------------------------------------------------------|---------|----------------------------------------------------------------------------------------------------------|---------|-------------------------------|
| 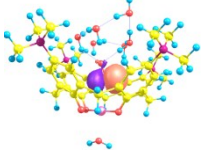<br>$\rho_{ip}(O2)$ | 0.98828 | <br>$\rho_{ip}(O2)$     | 0.91143 |                               |
| <br>$\rho_{ip}(O1)$ | 0.99005 | <br>$\rho_{ip}(O1)$     | 0.95835 |                               |
| <br>$\rho_{op}(O1)$ | 0.96776 | <br>$\pi^*_{op}(O1-O2)$ | 0.00739 |                               |
| <b>[MnL(O<sub>2</sub>)(H<sub>2</sub>O)]<sup>2+</sup>-8H<sub>2</sub>O</b>                             |         |                                                                                                          |         |                               |
| $\alpha$                                                                                             |         | $\beta$                                                                                                  |         |                               |
| <br>$3d_{xz}$     | 0.97416 | --                                                                                                       | --      | Mn( $\alpha$ - $\beta$ )=3.31 |
| <br>$3d_{yz}$     | 0.97796 | --                                                                                                       | --      |                               |

|                                                                                                                    |         |                                                                                                                        |         |                          |
|--------------------------------------------------------------------------------------------------------------------|---------|------------------------------------------------------------------------------------------------------------------------|---------|--------------------------|
| 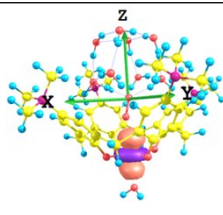 <p><math>3d_{z^2}</math></p>     | 0.97570 |  <p><math>3d_{z^2}</math></p>         | 0.15567 |                          |
|  <p><math>3d_{xy}</math></p>      | 0.96976 |  <p><math>3d_{xy}</math></p>          | 0.17717 |                          |
| <p><math>3d_{x^2-y^2}</math></p>                                                                                   |         |  <p><math>3d_{x^2-y^2}</math></p>     | 0.25466 |                          |
|  <p><math>p_{op}(O2)</math></p>  | 0.99275 |  <p><math>\pi_{op}(O1-O2)</math></p> | 0.99390 | $O_2(\alpha-\beta)=1.01$ |
|  <p><math>p_{ip}(O2)</math></p> | 0.98846 |  <p><math>p_{ip}(O2)</math></p>     | 0.97902 |                          |
|  <p><math>p_{op}(O1)</math></p> | 0.99347 |  <p><math>p_{ip}(O1)</math></p>     | 0.94235 |                          |

|                                                                                                                  |         |                                                                                                                         |         |  |
|------------------------------------------------------------------------------------------------------------------|---------|-------------------------------------------------------------------------------------------------------------------------|---------|--|
| 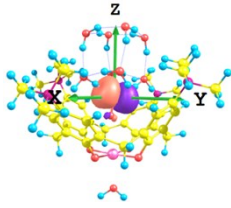 <p><math>p_{ip}(O1)</math></p> | 0.94942 |  <p><math>\pi^*_{op}(O1-O2)</math></p> | 0.01111 |  |
|------------------------------------------------------------------------------------------------------------------|---------|-------------------------------------------------------------------------------------------------------------------------|---------|--|

**Table S6** Mulliken spin populations on Mn-O<sub>2</sub> unit (e.g.,  $S_{Mn}$ ) and Wiberg bond indices (e.g.,  $B_{O1-O2}$ ) of  $[MnL(O_2)(H_2O)]^{2+}-nH_2O$  complexes. The results of  $[MnL(O_2)(H_2O)]^{2+}-8H_2O$  in CPCM model is based on B3LYP/B2 method.

|             | $n = 0$ | $n = 1$ | $n = 4$ | $n = 6$ | $n = 8$ | $n = 8$ (CPCM) |
|-------------|---------|---------|---------|---------|---------|----------------|
| $S_{Mn}/e$  | 3.91    | 3.96    | 3.98    | 3.97    | 3.99    | 4.00           |
| $S_{O1}/e$  | 0.61    | 0.54    | 0.47    | 0.49    | 0.48    | 0.51           |
| $S_{O2}/e$  | 0.50    | 0.54    | 0.56    | 0.55    | 0.53    | 0.53           |
| $B_{O1-O2}$ | 1.49    | 1.50    | 1.49    | 1.49    | 1.48    | 1.49           |
| $B_{Mn-O1}$ | 0.07    | 0.04    | 0.03    | 0.03    | 0.02    | 0.03           |
| $B_{Mn-O2}$ | 0.42    | 0.34    | 0.26    | 0.26    | 0.20    | 0.25           |

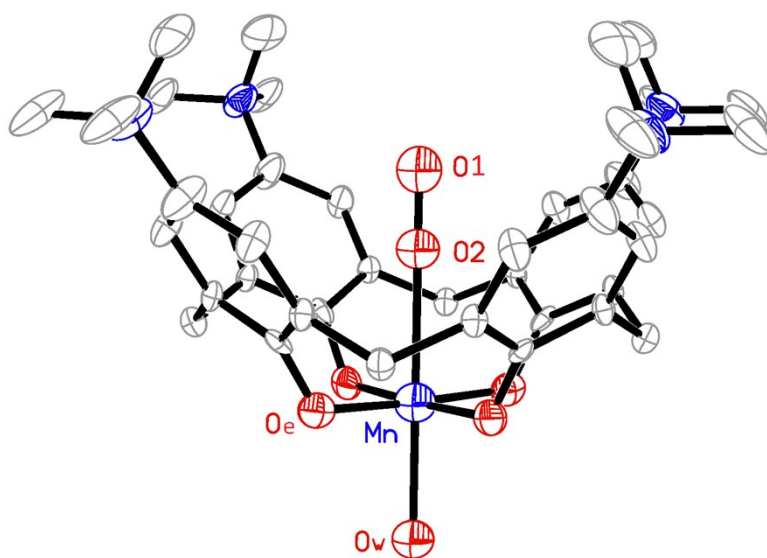

**Fig. S1** View of the bowl-shaped cationic structure of  $[\text{MnL}(\text{O}_2)(\text{H}_2\text{O})](\text{PF}_6)_2$  with 50% thermal ellipsoids.

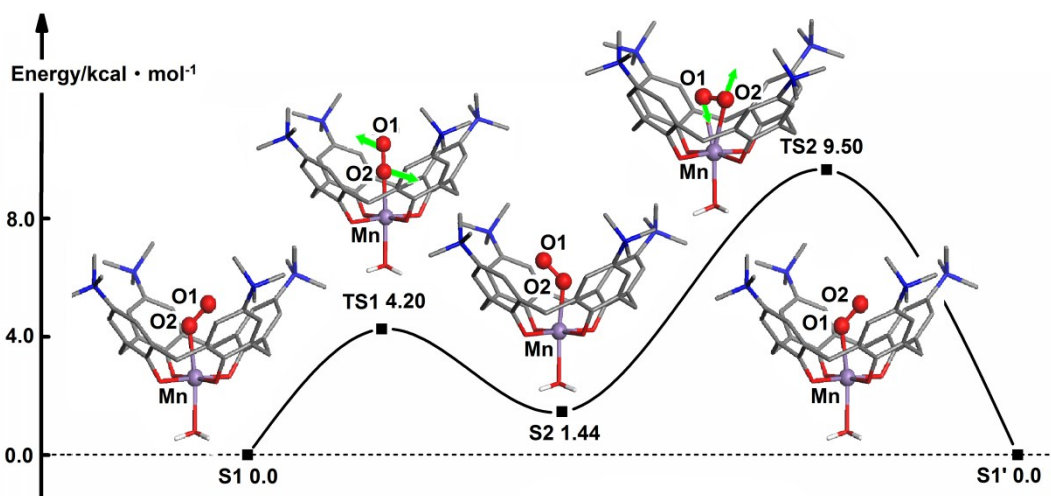

**Fig. S2** Potential energy surface of three binding configurations of  $S = 5/2$ .

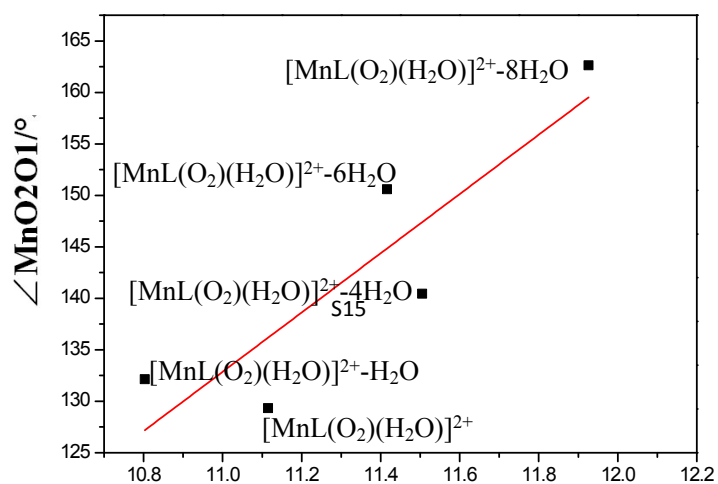

**Fig. S3** Linear relationship of Mn-O2-O1 ( $\angle$ MnO2O1) bonding angle of optimized sextet  $[\text{MnL}(\text{O}_2)(\text{H}_2\text{O})]^{2+} \cdot n\text{H}_2\text{O}$  ( $n = 0, 1, 4, 6, 8$ ) with  $d_{\text{C}_\text{N}-\text{C}_\text{N}}$  ( $R^2 = 0.713$ ).

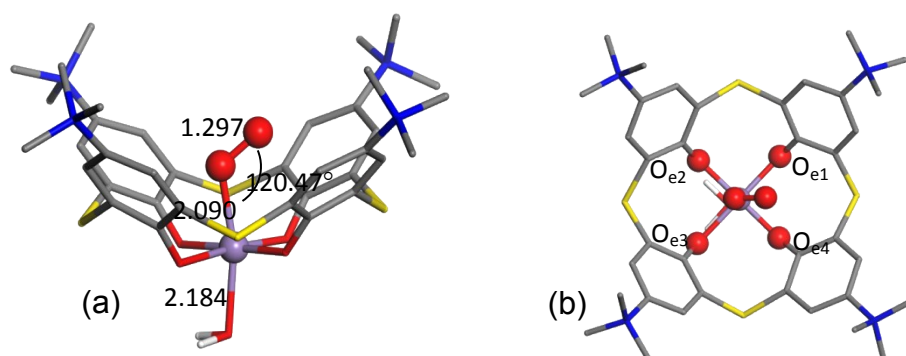

**Fig. S4** Optimized structure of  $[\text{MnL}^{\text{S}}(\text{O}_2)(\text{H}_2\text{O})]^{2+}$  complex (a) side view and (b) top view. The distances of  $\text{O}_{\text{e}1}-\text{O}_{\text{e}3}$  and  $\text{O}_{\text{e}2}-\text{O}_{\text{e}4}$  are 3.829 Å and 4.125 Å, respectively.

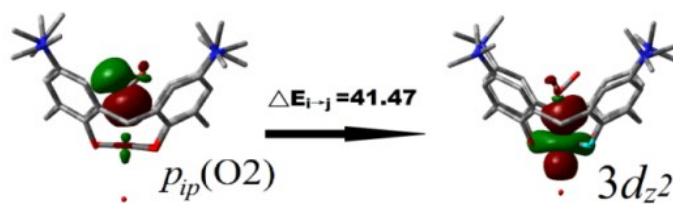

(a) Bent end-on  $[\text{MnL}(\text{O}_2)(\text{H}_2\text{O})]^{2+}$



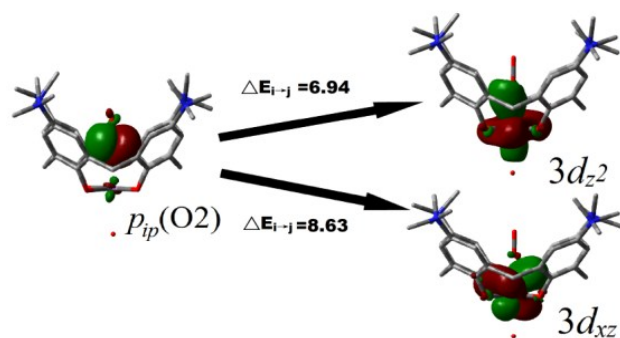

(b) Linear end-on  $[\text{MnL}(\text{O}_2)(\text{H}_2\text{O})]^{2+}$

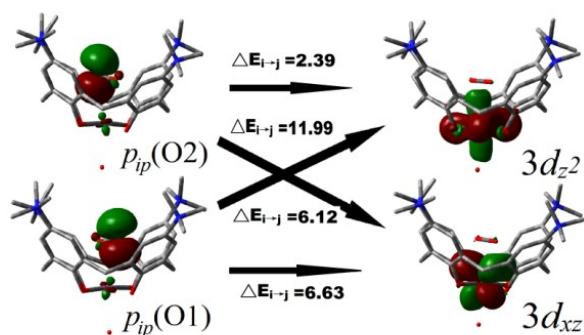

(c) Side-on  $[\text{MnL}(\text{O}_2)(\text{H}_2\text{O})]^{2+}$

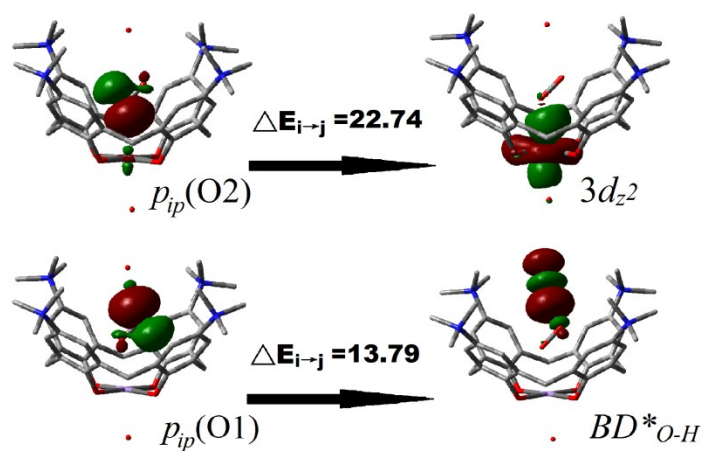

(d) Bent end-on  $[\text{MnL}(\text{O}_2)(\text{H}_2\text{O})]^{2+} - 1\text{H}_2\text{O}$

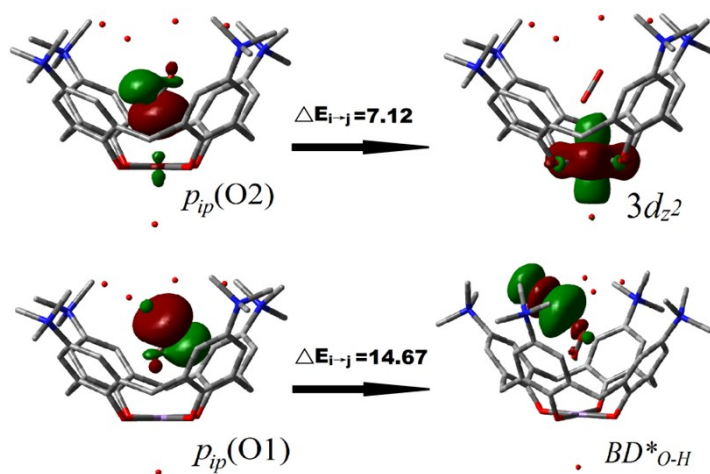

(e) Bent end-on  $[MnL(O_2)(H_2O)]^{2+} \cdot 4H_2O$

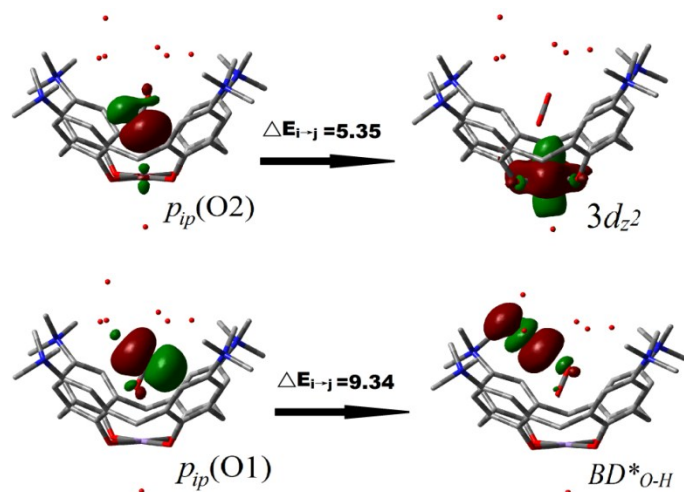

(f) Bent end-on  $[MnL(O_2)(H_2O)]^{2+} \cdot 6H_2O$

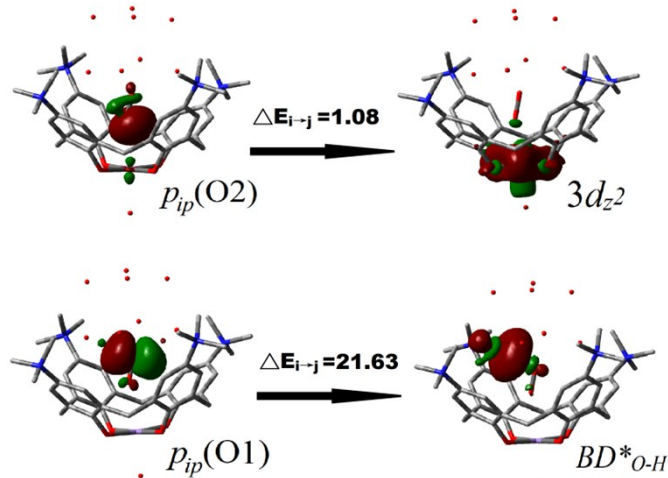

(g) Bent end-on  $[MnL(O_2)(H_2O)]^{2+} \cdot 8H_2O$

**Fig. S5** NBOs of superoxo donors (left) and Mn(III) acceptors (right) for sextet

$[\text{MnL}(\text{O}_2)(\text{H}_2\text{O})]^{2+}$  in three different binding configurations (a-c) and  $[\text{MnL}(\text{O}_2)(\text{H}_2\text{O})]^{2+}\text{-nH}_2\text{O}$  ( $n = 1, 4, 6, 8$ ) complexes (d-g), as well as second-order perturbation energies ( $\Delta E_{i \rightarrow j}$  in kcal/mol). All hydrogen atoms are omitted for clarity.

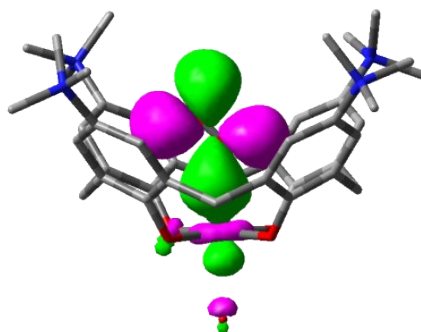

**Fig. S6.** HOMO of the sextet bent end-on  $[\text{MnL}(\text{O}_2)(\text{H}_2\text{O})]^{2+}$  in  $\beta$  space, corresponding to a bonding interaction of superoxo  $\pi^*_{ip}$  with Mn  $3d_{z^2}$

**Cartesian coordinates of all structures described in this work:**

$[\text{MnL}(\text{O}_2)(\text{H}_2\text{O})]^{2+}$  (Bent end-on)

Charge=2 S=5/2

Gibbs free energy: -3452.089338 Ha

|    |             |             |            |
|----|-------------|-------------|------------|
| O  | 1.93646200  | -0.27991800 | 2.52997400 |
| O  | 0.30755900  | 1.90003100  | 2.52276400 |
| O  | -0.26410600 | -1.91470700 | 2.53806700 |
| O  | -1.87793800 | 0.26734400  | 2.52074600 |
| O  | 0.16112300  | -0.22296400 | 4.79456000 |
| O  | 0.23003300  | 0.12314400  | 0.24342400 |
| Mn | 0.01371400  | 0.00030300  | 2.47471800 |
| C  | 2.64784100  | -0.38238600 | 1.44135800 |
| C  | 0.40304500  | 2.62518100  | 1.44479900 |

|   |             |             |             |
|---|-------------|-------------|-------------|
| C | -0.37728600 | -2.62685400 | 1.44826000  |
| C | -2.61314600 | 0.38185100  | 1.44957200  |
| H | 1.09495500  | -0.15819100 | 5.04122700  |
| H | -0.13099300 | -1.11999100 | 5.01244500  |
| O | -0.53731900 | -0.39073000 | -0.70176800 |
| C | 2.87189800  | -1.66040900 | 0.84841700  |
| C | 3.23034000  | 0.78367700  | 0.85148600  |
| C | 1.67989500  | 2.86668400  | 0.85482000  |
| C | -0.76669900 | 3.21360000  | 0.87009000  |
| C | -1.65956200 | -2.85388600 | 0.86692600  |
| C | 0.78471900  | -3.20457800 | 0.85012200  |
| C | -2.84934300 | 1.66398400  | 0.87508900  |
| C | -3.21660100 | -0.77931300 | 0.87519200  |
| C | 3.77396000  | -1.77407000 | -0.20883700 |
| C | 2.17268300  | -2.89732500 | 1.41158500  |
| C | 4.12497700  | 0.62887400  | -0.19986700 |
| C | 2.91866100  | 2.16912000  | 1.41541200  |
| C | 1.78855000  | 3.78761200  | -0.18505600 |
| C | -0.61736300 | 4.12371100  | -0.16994100 |
| C | -2.14600500 | 2.89542100  | 1.44492600  |
| C | -1.77942000 | -3.75564400 | -0.18848500 |
| C | -2.89670100 | -2.16255600 | 1.43856200  |
| C | 0.62518200  | -4.09150900 | -0.20897000 |
| C | -3.77693100 | 1.78473600  | -0.15985800 |
| C | -4.14119200 | -0.61774900 | -0.14802700 |
| H | 3.96828900  | -2.76484300 | -0.60403500 |
| C | 4.41268800  | -0.64082200 | -0.71796900 |
| H | 2.81638500  | -3.76847400 | 1.23423400  |
| H | 2.07725000  | -2.76729200 | 2.49349200  |
| H | 4.60641900  | 1.51920500  | -0.59812400 |
| H | 3.78800700  | 2.81560800  | 1.23970500  |
| H | 2.78750300  | 2.07226300  | 2.49726400  |
| H | 2.77772400  | 3.99458300  | -0.57782900 |
| C | 0.64940800  | 4.42656000  | -0.68437600 |
| H | -1.51000700 | 4.61149500  | -0.55519000 |
| H | -2.79432200 | 3.76695300  | 1.28766800  |
| H | -2.03548900 | 2.75011400  | 2.52397400  |
| H | -2.77242400 | -3.94990300 | -0.57739800 |
| C | -0.64718500 | -4.38320600 | -0.71343000 |
| H | -3.76422800 | -2.81283100 | 1.26815300  |
| H | -2.76116000 | -2.06288400 | 2.51970600  |
| H | 1.51367300  | -4.56771300 | -0.61741100 |
| H | -3.98068600 | 2.77794200  | -0.54384500 |
| C | -4.43281300 | 0.65552600  | -0.65492500 |

|   |             |             |             |
|---|-------------|-------------|-------------|
| H | -4.63877500 | -1.50380000 | -0.53540100 |
| N | 5.47892100  | -0.74466200 | -1.78999000 |
| N | 0.74671700  | 5.51501900  | -1.73477800 |
| N | -0.75543500 | -5.42923400 | -1.80497100 |
| N | -5.52026100 | 0.76721900  | -1.70475300 |
| C | 6.80101800  | -0.24095400 | -1.24782900 |
| C | 5.69700000  | -2.15735000 | -2.26014200 |
| C | 5.08263600  | 0.07673400  | -2.99500600 |
| C | 0.24976500  | 6.82608200  | -1.15999300 |
| C | 2.15613900  | 5.74026700  | -2.21123600 |
| C | -0.08450900 | 5.14691000  | -2.94174500 |
| C | -0.21871500 | -6.75364200 | -1.30315800 |
| C | -2.17398000 | -5.66196200 | -2.25027900 |
| C | 0.03359000  | -4.98998000 | -3.01681800 |
| C | -6.83396200 | 0.27163900  | -1.13568500 |
| C | -5.73864800 | 2.18138500  | -2.16999500 |
| C | -5.15269800 | -0.05597600 | -2.91769500 |
| H | 7.06647200  | -0.84986900 | -0.38357800 |
| H | 6.68752400  | 0.79653300  | -0.94024700 |
| H | 7.56167900  | -0.32359200 | -2.02751200 |
| H | 6.02107700  | -2.76894100 | -1.41922900 |
| H | 4.76612200  | -2.54220300 | -2.67502500 |
| H | 6.47072900  | -2.14365000 | -3.02891100 |
| H | 4.12730300  | -0.29941300 | -3.36140300 |
| H | 4.97471500  | 1.11708900  | -2.69592300 |
| H | 5.85655900  | -0.01407600 | -3.76056300 |
| H | 0.86427000  | 7.07032000  | -0.29345000 |
| H | -0.78614300 | 6.70782400  | -0.84874500 |
| H | 0.32963400  | 7.60415400  | -1.92270400 |
| H | 2.77417400  | 6.04968300  | -1.36955800 |
| H | 2.53705600  | 4.81606700  | -2.64435900 |
| H | 2.13749500  | 6.52700100  | -2.96658600 |
| H | -1.12285800 | 5.03403100  | -2.63776000 |
| H | 0.28726700  | 4.19956200  | -3.33245600 |
| H | 0.00185800  | 5.93778100  | -3.69025700 |
| H | -0.80432800 | -7.04786200 | -0.43214000 |
| H | 0.82346100  | -6.63058900 | -1.01614100 |
| H | -0.30650200 | -7.49835100 | -2.09745600 |
| H | -2.76310100 | -6.00822700 | -1.40211500 |
| H | -2.58152100 | -4.73118100 | -2.64286800 |
| H | -2.16361600 | -6.42358600 | -3.03109700 |
| H | -0.36316500 | -4.03034600 | -3.34874600 |
| H | 1.07841500  | -4.87441400 | -2.73645400 |
| H | -0.06309900 | -5.74508700 | -3.80037000 |

|   |             |             |             |
|---|-------------|-------------|-------------|
| H | -7.07807700 | 0.88202500  | -0.26615800 |
| H | -6.72051700 | -0.76650500 | -0.83027200 |
| H | -7.60994200 | 0.35882500  | -1.89965300 |
| H | -6.04254900 | 2.79474100  | -1.32285300 |
| H | -4.81338600 | 2.56025200  | -2.60257800 |
| H | -6.52722200 | 2.17272100  | -2.92360700 |
| H | -5.04998200 | -1.09780100 | -2.62214800 |
| H | -4.19943700 | 0.31086600  | -3.29863300 |
| H | -5.93884400 | 0.04411700  | -3.66951900 |

[MnL(O<sub>2</sub>)(H<sub>2</sub>O)]<sup>2+</sup> (Bent end-on)

Charge=2 S=3/2

Gibbs free energy: -3452.086475 Ha

|    |             |             |             |
|----|-------------|-------------|-------------|
| O  | 1.96944300  | -0.10808000 | 2.53804600  |
| O  | 0.13822200  | 1.91043100  | 2.51739400  |
| O  | -0.08932800 | -1.94499300 | 2.54871200  |
| O  | -1.89044800 | 0.08875000  | 2.50482100  |
| O  | 0.17032900  | -0.20411500 | 4.76660400  |
| O  | 0.24046500  | 0.07831700  | 0.29934000  |
| Mn | 0.02246100  | -0.00866300 | 2.45189100  |
| C  | 2.69075900  | -0.14846600 | 1.45311500  |
| C  | 0.17168700  | 2.63534600  | 1.43453700  |
| C  | -0.14159700 | -2.64524800 | 1.44581000  |
| C  | -2.64842700 | 0.14182700  | 1.44677300  |
| H  | 1.09168900  | -0.04673900 | 5.01851100  |
| H  | -0.03155500 | -1.12669300 | 4.98050000  |
| O  | -0.54707400 | -0.32658000 | -0.68160100 |
| C  | 3.02480300  | -1.40196500 | 0.85908500  |
| C  | 3.16752000  | 1.06414500  | 0.86188700  |
| C  | 1.42375400  | 2.98923900  | 0.84834200  |
| C  | -1.04502600 | 3.11438700  | 0.85496300  |
| C  | -1.39850200 | -2.97397600 | 0.85695300  |
| C  | 1.06748300  | -3.10812300 | 0.83902200  |
| C  | -3.00047700 | 1.39935400  | 0.87708900  |
| C  | -3.15873100 | -1.06730800 | 0.88082100  |
| C  | 3.94484100  | -1.43670100 | -0.18801900 |
| C  | 2.42342600  | -2.69323600 | 1.41152500  |
| C  | 4.08170000  | 0.98847500  | -0.18172200 |
| C  | 2.72046300  | 2.41525300  | 1.41837800  |
| C  | 1.45184000  | 3.90979900  | -0.19670300 |
| C  | -0.97478400 | 4.02719700  | -0.19135000 |
| C  | -2.39258000 | 2.68503000  | 1.43605500  |
| C  | -1.43663700 | -3.86456800 | -0.21430000 |
| C  | -2.69727700 | -2.41301900 | 1.43646600  |

|   |             |             |             |
|---|-------------|-------------|-------------|
| C | 0.98787100  | -3.98633100 | -0.23609100 |
| C | -3.95666400 | 1.43956500  | -0.13770700 |
| C | -4.11199400 | -0.98671100 | -0.12527100 |
| H | 4.22887900  | -2.40692300 | -0.57996800 |
| C | 4.48848300  | -0.25210300 | -0.69140100 |
| H | 3.13547900  | -3.50956500 | 1.23437400  |
| H | 2.31004200  | -2.57711000 | 2.49324200  |
| H | 4.48316100  | 1.91766200  | -0.58006300 |
| H | 3.52465000  | 3.14188000  | 1.24561500  |
| H | 2.59167300  | 2.30863100  | 2.49960100  |
| H | 2.41967100  | 4.20413200  | -0.58671800 |
| C | 0.26129400  | 4.44024100  | -0.70332700 |
| H | -1.90646400 | 4.42861200  | -0.58383600 |
| H | -3.10913200 | 3.50159700  | 1.28008100  |
| H | -2.26396400 | 2.55321300  | 2.51494000  |
| H | -2.40848300 | -4.13927600 | -0.60797700 |
| C | -0.25398300 | -4.38044400 | -0.74793800 |
| H | -3.49494200 | -3.14770500 | 1.26781100  |
| H | -2.56596000 | -2.30329100 | 2.51716000  |
| H | 1.91521800  | -4.37480600 | -0.65109000 |
| H | -4.25343700 | 2.41162400  | -0.51507800 |
| C | -4.52377000 | 0.25841700  | -0.62135000 |
| H | -4.53654400 | -1.91221100 | -0.50768800 |
| N | 5.57343900  | -0.26546900 | -1.74987100 |
| N | 0.26565200  | 5.51993300  | -1.76734200 |
| N | -0.27182500 | -5.41820100 | -1.85290700 |
| N | -5.63330300 | 0.27900800  | -1.65385600 |
| C | 6.83458300  | 0.36858800  | -1.19924800 |
| C | 5.93183100  | -1.65617200 | -2.19845400 |
| C | 5.11614600  | 0.50060100  | -2.96967700 |
| C | -0.37483300 | 6.78022100  | -1.22235700 |
| C | 1.65313800  | 5.88431100  | -2.22077400 |
| C | -0.49993800 | 5.05043000  | -2.98289500 |
| C | 0.37374800  | -6.69850600 | -1.36481200 |
| C | -1.66501200 | -5.76384900 | -2.30435400 |
| C | 0.47912500  | -4.90038100 | -3.05783900 |
| C | -6.88401900 | -0.35174000 | -1.07688500 |
| C | -5.99657700 | 1.67203600  | -2.09115000 |
| C | -5.20470900 | -0.48544400 | -2.88520900 |
| H | 7.14364000  | -0.20036200 | -0.32242000 |
| H | 6.61969700  | 1.39509000  | -0.90987000 |
| H | 7.61047100  | 0.34650000  | -1.96791600 |
| H | 6.30113000  | -2.22318200 | -1.34497100 |
| H | 5.04752100  | -2.13364800 | -2.61855700 |

|   |             |             |             |
|---|-------------|-------------|-------------|
| H | 6.71070200  | -1.57785300 | -2.95804100 |
| H | 4.20880100  | 0.02782400  | -3.34604300 |
| H | 4.90016900  | 1.52785800  | -2.68356700 |
| H | 5.90671600  | 0.47990300  | -3.72327800 |
| H | 0.19329200  | 7.09687400  | -0.34769300 |
| H | -1.39981500 | 6.56122100  | -0.93073700 |
| H | -0.35802300 | 7.55234200  | -1.99496600 |
| H | 2.21939900  | 6.26265400  | -1.37075300 |
| H | 2.13538000  | 5.00038100  | -2.63622000 |
| H | 1.56838000  | 6.65799400  | -2.98495600 |
| H | -1.52551600 | 4.83067100  | -2.69371100 |
| H | -0.02332300 | 4.14277500  | -3.35358500 |
| H | -0.48443800 | 5.83612900  | -3.74173200 |
| H | -0.18654700 | -7.05066700 | -0.49868400 |
| H | 1.40119600  | -6.49076700 | -1.07374800 |
| H | 0.35023800  | -7.43911800 | -2.16745000 |
| H | -2.22383500 | -6.16861500 | -1.46159900 |
| H | -2.14868100 | -4.86536200 | -2.68549300 |
| H | -1.58965600 | -6.51200900 | -3.09451900 |
| H | 0.00204100  | -3.97502600 | -3.38117900 |
| H | 1.50992100  | -4.69869900 | -2.77394300 |
| H | 0.44859100  | -5.65280300 | -3.84925800 |
| H | -7.17206600 | 0.21645400  | -0.19240300 |
| H | -6.66686700 | -1.37962300 | -0.79422400 |
| H | -7.67633900 | -0.32552600 | -1.82845300 |
| H | -6.34446900 | 2.23853200  | -1.22835700 |
| H | -5.12022300 | 2.14703500  | -2.53021700 |
| H | -6.79282100 | 1.59798100  | -2.83295500 |
| H | -4.98963400 | -1.51485700 | -2.60643300 |
| H | -4.30107800 | -0.01751300 | -3.27633900 |
| H | -6.00980300 | -0.45680500 | -3.62306500 |

[MnL(O<sub>2</sub>)(H<sub>2</sub>O)]<sup>2+</sup> (Bent end-on)

Charge=2 S=1/2

Gibbs free energy: -3452.064504 Ha

|    |             |             |            |
|----|-------------|-------------|------------|
| O  | 0.54894100  | -1.89549400 | 2.52963600 |
| O  | 1.88538200  | 0.50580600  | 2.51376800 |
| O  | -1.83638300 | -0.54764900 | 2.48374200 |
| O  | -0.51597700 | 1.81703600  | 2.45864600 |
| O  | -0.08923800 | -0.11372000 | 4.46949300 |
| O  | 0.24974900  | -0.14728000 | 0.49213900 |
| Mn | 0.02954900  | -0.01758800 | 2.39440700 |



|   |             |             |             |
|---|-------------|-------------|-------------|
| C | 0.74511100  | -2.58773700 | 1.44507400  |
| C | 2.58592700  | 0.71248900  | 1.44042900  |
| C | -2.55809600 | -0.74324500 | 1.41934800  |
| C | -0.71777200 | 2.54465100  | 1.40360100  |
| H | 0.35327900  | -0.92899200 | 4.75134300  |
| H | -1.02939200 | -0.19331200 | 4.69416000  |
| O | -0.59542400 | 0.31298000  | -0.39274600 |
| C | -0.33173500 | -3.30550300 | 0.83985500  |
| C | 2.04636900  | -2.63241400 | 0.84673400  |
| C | 3.32328100  | -0.35891900 | 0.84813700  |
| C | 2.63603100  | 2.01625200  | 0.84771100  |
| C | -3.29677400 | 0.33256700  | 0.83880900  |
| C | -2.62006200 | -2.04639600 | 0.83326600  |
| C | 0.35519300  | 3.29085400  | 0.83144100  |
| C | -2.02732600 | 2.62022600  | 0.82902700  |
| C | -0.06359400 | -4.17449700 | -0.21761500 |
| C | -1.75294000 | -3.17561200 | 1.39503300  |
| C | 2.27225200  | -3.51065300 | -0.20616600 |
| C | 3.18204900  | -1.77529300 | 1.40958600  |
| C | 4.21639400  | -0.08478100 | -0.18570700 |
| C | 3.53637900  | 2.24820200  | -0.18569200 |
| C | 1.76742500  | 3.14658900  | 1.40461200  |
| C | -4.19530700 | 0.05937400  | -0.19003300 |
| C | -3.15496700 | 1.75269800  | 1.39238800  |
| C | -3.52384800 | -2.27680200 | -0.19875400 |
| C | 0.08002000  | 4.20283500  | -0.18737500 |
| C | -2.26185700 | 3.54395800  | -0.18063100 |
| H | -0.88840800 | -4.75443500 | -0.61676800 |
| C | 1.23293700  | -4.29494700 | -0.72481900 |
| H | -2.27543200 | -4.12570200 | 1.22383800  |
| H | -1.67454900 | -3.02693600 | 2.47601800  |
| H | 3.28209600  | -3.58306500 | -0.60454300 |
| H | 4.12742500  | -2.30761700 | 1.24227900  |
| H | 3.03174500  | -1.68900100 | 2.48973000  |
| H | 4.81190500  | -0.90467200 | -0.57223800 |
| C | 4.33951500  | 1.21506000  | -0.68765300 |
| H | 3.61479200  | 3.25998200  | -0.57815600 |
| H | 2.29876800  | 4.09454900  | 1.24947500  |
| H | 1.67054200  | 2.98749100  | 2.48319400  |
| H | -4.78646900 | 0.88201200  | -0.57654200 |
| C | -4.32193300 | -1.23889600 | -0.69595100 |
| H | -4.10450500 | 2.27843600  | 1.22783000  |
| H | -2.99966300 | 1.67423300  | 2.47293000  |
| H | -3.60879300 | -3.28814200 | -0.59080200 |

|   |             |             |             |
|---|-------------|-------------|-------------|
| H | 0.90018300  | 4.80389300  | -0.56428500 |
| C | -1.22138600 | 4.34340900  | -0.67805900 |
| H | -3.27519800 | 3.63922600  | -0.56508400 |
| N | 1.57739300  | -5.32139400 | -1.78559200 |
| N | 5.39438400  | 1.57079000  | -1.71644700 |
| N | -5.37023800 | -1.58325100 | -1.73579200 |
| N | -1.57251900 | 5.41235400  | -1.69397400 |
| C | 2.56618200  | -6.32271400 | -1.22379400 |
| C | 0.37636000  | -6.09435800 | -2.25915000 |
| C | 2.18108900  | -4.64180100 | -2.99247200 |
| C | 6.37902000  | 2.55482900  | -1.11754200 |
| C | 6.18148000  | 0.37514900  | -2.17970700 |
| C | 4.74883600  | 2.18598300  | -2.93593100 |
| C | -6.35791100 | -2.57529400 | -1.15651800 |
| C | -6.15531000 | -0.38268300 | -2.19092800 |
| C | -4.71391200 | -2.18210700 | -2.95772100 |
| C | -2.55521700 | 6.39206800  | -1.08547000 |
| C | -0.37454800 | 6.20227900  | -2.14647900 |
| C | -2.18663500 | 4.78203400  | -2.92209300 |
| H | 2.10886400  | -6.79905000 | -0.35662700 |
| H | 3.46739500  | -5.79638500 | -0.91625500 |
| H | 2.80217100  | -7.06266500 | -1.99212200 |
| H | -0.05765900 | -6.63307800 | -1.41797000 |
| H | -0.34919000 | -5.40045300 | -2.68205200 |
| H | 0.70663000  | -6.80107700 | -3.02160200 |
| H | 1.45441200  | -3.92592800 | -3.37709200 |
| H | 3.08598500  | -4.11835100 | -2.69122600 |
| H | 2.41947200  | -5.39608400 | -3.74577500 |
| H | 6.82992900  | 2.09031300  | -0.24067100 |
| H | 5.84357900  | 3.45321600  | -0.81761200 |
| H | 7.14090200  | 2.79742700  | -1.86210200 |
| H | 6.69929100  | -0.06494600 | -1.32867800 |
| H | 5.49978900  | -0.34824500 | -2.62560800 |
| H | 6.90677400  | 0.71249500  | -2.92133600 |
| H | 4.21343800  | 3.08576900  | -2.64048300 |
| H | 4.04718400  | 1.46162000  | -3.34992600 |
| H | 5.52427500  | 2.43528200  | -3.66378100 |
| H | -6.81772300 | -2.12117200 | -0.27881100 |
| H | -5.82383900 | -3.47631000 | -0.86208400 |
| H | -7.11283600 | -2.81105000 | -1.91024900 |
| H | -6.67864100 | 0.04769200  | -1.33829300 |
| H | -5.47154500 | 0.34581000  | -2.62506700 |
| H | -6.87580500 | -0.71292300 | -2.94039600 |
| H | -4.00676300 | -1.45306700 | -3.35383600 |

|   |             |             |             |
|---|-------------|-------------|-------------|
| H | -4.18329500 | -3.08715100 | -2.66969200 |
| H | -5.48272300 | -2.41931900 | -3.69659700 |
| H | -2.09052700 | 6.83273600  | -0.20349600 |
| H | -3.45493800 | 5.85524000  | -0.79223400 |
| H | -2.79572000 | 7.16235200  | -1.82196900 |
| H | 0.06355000  | 6.71183500  | -1.28945400 |
| H | 0.34933300  | 5.52390800  | -2.59651900 |
| H | -0.70909700 | 6.93476700  | -2.88227100 |
| H | -3.08839600 | 4.24571600  | -2.63453900 |
| H | -1.46321500 | 4.08267000  | -3.34156000 |
| H | -2.43197300 | 5.56609400  | -3.64209200 |

[MnL(O<sub>2</sub>)(H<sub>2</sub>O)]<sup>2+</sup> (Linear end-on)

Charge=2 S=5/2

Gibbs free energy: -3452.082648 Ha

|    |             |             |             |
|----|-------------|-------------|-------------|
| Mn | -0.00474100 | -0.00243600 | 2.49888700  |
| O  | -0.02374600 | -0.01492200 | 0.32598600  |
| O  | -0.02580700 | 0.00223100  | -0.99400900 |
| O  | -1.93611400 | 0.13232300  | 2.54829900  |
| O  | -0.15118100 | -1.94966500 | 2.58264600  |
| O  | 0.12631400  | 1.92235200  | 2.58130100  |
| O  | 1.90486100  | -0.15268700 | 2.52800300  |
| O  | -0.13733000 | -0.20471400 | 4.78454100  |
| C  | -2.65285900 | 0.19253900  | 1.45932100  |
| C  | -0.19913000 | -2.64751500 | 1.47860400  |
| C  | 0.18628500  | 2.63421100  | 1.48909100  |
| C  | 2.63709200  | -0.20023400 | 1.45181200  |
| H  | -0.17062400 | -1.15788700 | 4.95473000  |
| H  | -0.95595300 | 0.17897900  | 5.12920300  |
| C  | -2.97077100 | 1.45329000  | 0.87589900  |
| C  | -3.15041100 | -1.00870400 | 0.86656900  |
| C  | -1.45548100 | -2.96157600 | 0.87921400  |
| C  | 1.00416600  | -3.13832800 | 0.88039000  |
| C  | 1.44713000  | 2.95620800  | 0.90358700  |
| C  | -1.01265200 | 3.14102800  | 0.89594300  |
| C  | 2.96984300  | -1.45712800 | 0.86895600  |
| C  | 3.14593800  | 1.00659200  | 0.88127300  |
| C  | -3.86916000 | 1.50549800  | -0.18879100 |
| C  | -2.37301300 | 2.73302100  | 1.45531900  |
| C  | -4.04288100 | -0.91651500 | -0.19478300 |
| C  | -2.74392000 | -2.36400500 | 1.44004100  |
| C  | -1.50296600 | -3.85354700 | -0.19066200 |
| C  | 0.91614300  | -4.02350100 | -0.18723100 |
| C  | 2.36555800  | -2.73642900 | 1.44253200  |

|   |             |             |             |
|---|-------------|-------------|-------------|
| C | 1.50100200  | 3.86842400  | -0.14878400 |
| C | 2.73095300  | 2.35305900  | 1.46853300  |
| C | -0.91848700 | 4.04721700  | -0.15303200 |
| C | 3.89298000  | -1.50186100 | -0.17435800 |
| C | 4.06263600  | 0.92211600  | -0.15978500 |
| H | -4.13272400 | 2.48118600  | -0.58092500 |
| C | -4.41669400 | 0.33085000  | -0.70997600 |
| H | -3.07993400 | 3.55491500  | 1.28464600  |
| H | -2.26765100 | 2.59962100  | 2.53593900  |
| H | -4.45450000 | -1.83784600 | -0.60058400 |
| H | -3.56192600 | -3.07431500 | 1.26464900  |
| H | -2.62385000 | -2.25030600 | 2.52116800  |
| H | -2.47710300 | -4.11350200 | -0.58928100 |
| C | -0.32695500 | -4.39946200 | -0.70896800 |
| H | 1.84051600  | -4.42792800 | -0.59349500 |
| H | 3.06907700  | -3.56094000 | 1.27045700  |
| H | 2.26171100  | -2.60356600 | 2.52344300  |
| H | 2.47775000  | 4.13509200  | -0.53638000 |
| C | 0.32894600  | 4.42819700  | -0.66177500 |
| H | 3.54927100  | 3.06728400  | 1.31176900  |
| H | 2.59848800  | 2.22348600  | 2.54692700  |
| H | -1.83941100 | 4.46538100  | -0.55329900 |
| H | 4.17035900  | -2.47449300 | -0.56470600 |
| C | 4.45000400  | -0.32180700 | -0.67460800 |
| H | 4.48588500  | 1.84622000  | -0.54696800 |
| N | -5.46391700 | 0.36350300  | -1.80484500 |
| N | -0.35234600 | -5.43709400 | -1.81226500 |
| N | 0.36412900  | 5.49269400  | -1.73906700 |
| N | 5.53110900  | -0.34552000 | -1.73647900 |
| C | -6.75431700 | -0.24828500 | -1.29927200 |
| C | -5.78164500 | 1.76039800  | -2.26570300 |
| C | -4.97560000 | -0.40983400 | -3.00823000 |
| C | 0.26700400  | -6.72811200 | -1.31799500 |
| C | -1.74687600 | -5.75916300 | -2.27632100 |
| C | 0.41890700  | -4.93273800 | -3.01050100 |
| C | -0.24669900 | 6.77543600  | -1.21334400 |
| C | 1.76195200  | 5.81607500  | -2.19251800 |
| C | -0.40819800 | 5.02481300  | -2.95102400 |
| C | 6.80708800  | 0.25454800  | -1.18176300 |
| C | 5.85798900  | -1.73789700 | -2.20427400 |
| C | 5.08569800  | 0.44461600  | -2.94536100 |
| H | -7.08589100 | 0.32710900  | -0.43488900 |
| H | -6.56778800 | -1.27787100 | -1.00111700 |
| H | -7.50138700 | -0.21462400 | -2.09554500 |

|   |             |             |             |
|---|-------------|-------------|-------------|
| H | -6.16776300 | 2.33586300  | -1.42540700 |
| H | -4.87554900 | 2.22030700  | -2.65826000 |
| H | -6.53730300 | 1.69516900  | -3.04959100 |
| H | -4.04162100 | 0.04122900  | -3.34386300 |
| H | -4.79732300 | -1.44296900 | -2.71768000 |
| H | -5.73436600 | -0.36690900 | -3.79291800 |
| H | -0.30795900 | -7.07193900 | -0.45812000 |
| H | 1.29456800  | -6.53746600 | -1.01559300 |
| H | 0.24032200  | -7.46767900 | -2.12154500 |
| H | -2.32133800 | -6.15190400 | -1.43837100 |
| H | -2.21059900 | -4.85326600 | -2.66477900 |
| H | -1.67742100 | -6.51048600 | -3.06402200 |
| H | 1.45128500  | -4.75365500 | -2.71771000 |
| H | -0.03527800 | -3.99632700 | -3.33494200 |
| H | 0.37880100  | -5.68290900 | -3.80361400 |
| H | 0.32842500  | 7.09237500  | -0.34331100 |
| H | -1.27651500 | 6.58488100  | -0.91856500 |
| H | -0.21206600 | 7.53524400  | -1.99749400 |
| H | 2.33687300  | 6.18622900  | -1.34469300 |
| H | 2.22082100  | 4.91611500  | -2.60011300 |
| H | 1.69914200  | 6.58543400  | -2.96318700 |
| H | 0.04087300  | 4.09457100  | -3.29947800 |
| H | -1.44223500 | 4.84483900  | -2.66469600 |
| H | -0.36216700 | 5.79511400  | -3.72426700 |
| H | 7.10734800  | -0.33210600 | -0.31352700 |
| H | 6.61496000  | 1.28143200  | -0.87783300 |
| H | 7.57979200  | 0.22650600  | -1.95344700 |
| H | 6.21888600  | -2.32418900 | -1.36029800 |
| H | 4.96198800  | -2.19053500 | -2.62736600 |
| H | 6.63567800  | -1.66604900 | -2.96571200 |
| H | 4.90074200  | 1.47465400  | -2.64819500 |
| H | 4.16256000  | 0.00066400  | -3.31841000 |
| H | 5.87026900  | 0.40926300  | -3.70460900 |

[MnL(O<sub>2</sub>)(H<sub>2</sub>O)]<sup>2+</sup> (Linear end-on)

Charge=2 S=3/2

Gibbs free energy: -3452.081853 Ha

|    |             |             |             |
|----|-------------|-------------|-------------|
| Mn | 0.00355300  | -0.00202500 | 2.46591900  |
| O  | 0.02387800  | -0.01025100 | 0.35799300  |
| O  | 0.02501900  | -0.01302400 | -0.96031300 |
| O  | 0.83582500  | -1.76284000 | 2.55926400  |
| O  | 1.77109800  | 0.82199100  | 2.57007100  |
| O  | -1.73587300 | -0.82962400 | 2.56128600  |
| O  | -0.80421500 | 1.74511200  | 2.54521700  |

|   |             |             |             |
|---|-------------|-------------|-------------|
| O | 0.23506900  | -0.06020400 | 4.76199500  |
| C | 1.13305800  | -2.41132400 | 1.46666200  |
| C | 2.40910900  | 1.12491800  | 1.47155300  |
| C | -2.39160200 | -1.12854400 | 1.47468600  |
| C | -1.11840900 | 2.40145600  | 1.46493800  |
| H | 1.03711000  | 0.44571200  | 4.95913300  |
| H | 0.40135500  | -0.97547100 | 5.02963800  |
| C | 0.18716500  | -3.29898600 | 0.87419700  |
| C | 2.42242600  | -2.25122100 | 0.86937300  |
| C | 3.29989000  | 0.18356000  | 0.87497300  |
| C | 2.24956600  | 2.41617800  | 0.87740500  |
| C | -3.29282000 | -0.18692200 | 0.89461400  |
| C | -2.24800300 | -2.42323300 | 0.88442400  |
| C | -0.18271000 | 3.30148000  | 0.87533500  |
| C | -2.41697500 | 2.24853700  | 0.88651800  |
| C | 0.58098900  | -4.10208900 | -0.19504800 |
| C | -1.22433400 | -3.40624000 | 1.44715100  |
| C | 2.77811000  | -3.06958900 | -0.19618000 |
| C | 3.40647700  | -1.23184500 | 1.43927900  |
| C | 4.10659700  | 0.58225300  | -0.18951200 |
| C | 3.07030600  | 2.77619500  | -0.18453400 |
| C | 1.23091700  | 3.40259500  | 1.44393100  |
| C | -4.12190400 | -0.58915900 | -0.15109300 |
| C | -3.39117800 | 1.22579000  | 1.46641800  |
| C | -3.09176600 | -2.78740800 | -0.15760000 |
| C | -0.59330900 | 4.12328400  | -0.17286000 |
| C | -2.78915800 | 3.08460900  | -0.15937500 |
| H | -0.14213200 | -4.80534100 | -0.59222400 |
| C | 1.87358800  | -4.00389800 | -0.71530500 |
| H | -1.59162500 | -4.42609900 | 1.27570400  |
| H | -1.16468000 | -3.24797000 | 2.52794100  |
| H | 3.78249600  | -2.97476700 | -0.60268600 |
| H | 4.42576500  | -1.59942800 | 1.26495100  |
| H | 3.24885300  | -1.17861500 | 2.52024700  |
| H | 4.81304600  | -0.13801800 | -0.58646000 |
| C | 4.00914200  | 1.87698600  | -0.70402600 |
| H | 2.97412100  | 3.78189500  | -0.58754700 |
| H | 1.60228800  | 4.42095400  | 1.27238300  |
| H | 1.17016500  | 3.24477200  | 2.52475600  |
| H | -4.83674900 | 0.13000600  | -0.53477800 |
| C | -4.03850700 | -1.88684300 | -0.66158000 |
| H | -4.41336000 | 1.59343200  | 1.31040500  |
| H | -3.21478200 | 1.16674800  | 2.54471300  |
| H | -3.00996000 | -3.79657000 | -0.55524000 |

|   |             |             |             |
|---|-------------|-------------|-------------|
| H | 0.12079400  | 4.83792100  | -0.56617600 |
| C | -1.89395700 | 4.03023100  | -0.67532600 |
| H | -3.80051100 | 2.99769700  | -0.55015300 |
| N | 2.35871000  | -4.93125100 | -1.81131300 |
| N | 4.93587700  | 2.36815100  | -1.79732500 |
| N | -4.99651400 | -2.38274700 | -1.72560800 |
| N | -2.40115700 | 4.98201300  | -1.74011500 |
| C | 3.51860700  | -5.76270400 | -1.30279000 |
| C | 1.29438200  | -5.88652600 | -2.27948400 |
| C | 2.80244600  | -4.12551700 | -3.01060000 |
| C | 5.76062400  | 3.53173600  | -1.28652000 |
| C | 5.89726300  | 1.30937800  | -2.26477100 |
| C | 4.12932400  | 2.80900300  | -2.99726400 |
| C | -5.81619900 | -3.53445700 | -1.18048600 |
| C | -5.96210500 | -1.32188700 | -2.17979700 |
| C | -4.22539900 | -2.84280500 | -2.94120200 |
| C | -3.54881300 | 5.80295700  | -1.18789200 |
| C | -1.34600500 | 5.94662700  | -2.20960900 |
| C | -2.87213900 | 4.20441000  | -2.94739800 |
| H | 3.17321700  | -6.33434300 | -0.44132900 |
| H | 4.32606900  | -5.09960300 | -0.99927900 |
| H | 3.85606800  | -6.42986300 | -2.09925000 |
| H | 0.97653200  | -6.50702100 | -1.44266600 |
| H | 0.45324800  | -5.31683100 | -2.67266800 |
| H | 1.72162300  | -6.51208400 | -3.06427400 |
| H | 1.95592600  | -3.52734800 | -3.34827400 |
| H | 3.61797100  | -3.46887200 | -2.71520300 |
| H | 3.13659300  | -4.80757900 | -3.79570500 |
| H | 6.33383800  | 3.18804600  | -0.42542500 |
| H | 5.09291600  | 4.33487500  | -0.98173700 |
| H | 6.42614000  | 3.87447800  | -2.08213200 |
| H | 6.51599500  | 0.99203000  | -1.42643000 |
| H | 5.33253400  | 0.46680900  | -2.66199000 |
| H | 6.52378500  | 1.74104400  | -3.04637400 |
| H | 3.46992400  | 3.62239100  | -2.70210600 |
| H | 3.53338800  | 1.96065300  | -3.33425300 |
| H | 4.81056800  | 3.14505500  | -3.78230700 |
| H | -6.36268500 | -3.17734900 | -0.30756500 |
| H | -5.14658900 | -4.33976700 | -0.88570100 |
| H | -6.50597100 | -3.87977900 | -1.95404100 |
| H | -6.55902900 | -0.99322700 | -1.33012400 |
| H | -5.40165900 | -0.48643600 | -2.59763900 |
| H | -6.60955900 | -1.75653100 | -2.94247000 |
| H | -3.63465600 | -2.00196500 | -3.30512000 |

|   |             |             |             |
|---|-------------|-------------|-------------|
| H | -3.56275900 | -3.65649800 | -2.65422900 |
| H | -4.92943400 | -3.18452800 | -3.70335500 |
| H | -3.18439300 | 6.35341400  | -0.32051100 |
| H | -4.35080200 | 5.13383800  | -0.88308700 |
| H | -3.90159000 | 6.48914800  | -1.96123300 |
| H | -1.01155100 | 6.55010600  | -1.36686900 |
| H | -0.51291500 | 5.38504700  | -2.63068500 |
| H | -1.78832500 | 6.58805400  | -2.97294400 |
| H | -3.68047700 | 3.54023600  | -2.64916900 |
| H | -2.03340300 | 3.61537800  | -3.31887600 |
| H | -3.22451800 | 4.90443700  | -3.70834300 |

**[MnL(O<sub>2</sub>)(H<sub>2</sub>O)]<sup>2+</sup> (Side-on)**

**Charge=2 S=5/2**

**Gibbs free energy: -3452.074199 Ha**

|    |             |             |             |
|----|-------------|-------------|-------------|
| O  | 0.03001900  | -1.93270400 | 2.44973000  |
| O  | 1.93521800  | 0.02238900  | 2.54249500  |
| O  | -1.94976100 | -0.05509700 | 2.54546900  |
| O  | -0.04030000 | 1.89977200  | 2.43454400  |
| O  | -0.17573600 | -0.10020200 | 4.65194300  |
| O  | 0.64411000  | -0.12599300 | -0.03077200 |
| Mn | 0.00454600  | -0.00578000 | 2.33586000  |
| C  | 0.05111500  | -2.63569200 | 1.35212200  |
| C  | 2.71102400  | 0.03952800  | 1.49816500  |
| C  | -2.71791700 | -0.05717400 | 1.49304800  |
| C  | -0.05290200 | 2.61807200  | 1.34988900  |
| H  | 0.24767200  | -0.89564100 | 5.00306700  |
| H  | -1.13059300 | -0.19334400 | 4.78798400  |
| O  | -0.65726700 | 0.10164600  | -0.03833600 |
| C  | -1.17544400 | -3.04469700 | 0.75196800  |
| C  | 1.30407500  | -3.00267900 | 0.76943200  |
| C  | 3.17623600  | -1.18437000 | 0.92393600  |
| C  | 3.11653900  | 1.28609900  | 0.91877000  |
| C  | -3.17038500 | 1.17212200  | 0.91993100  |
| C  | -3.12032800 | -1.29787300 | 0.89969900  |
| C  | 1.17802100  | 3.03900100  | 0.76833900  |
| C  | -1.30320600 | 2.99888900  | 0.77145800  |
| C  | -1.13380700 | -3.89804600 | -0.34993700 |
| C  | -2.50942000 | -2.61715200 | 1.37628600  |
| C  | 1.30011000  | -3.85499800 | -0.32785200 |
| C  | 2.61276200  | -2.52221800 | 1.40684300  |
| C  | 4.18018400  | -1.14596500 | -0.04164100 |
| C  | 4.11769600  | 1.28207800  | -0.04531400 |
| C  | 2.50282300  | 2.60071800  | 1.40387900  |



|   |             |             |             |
|---|-------------|-------------|-------------|
| C | -4.16225900 | 1.14118300  | -0.05866400 |
| C | -2.60922000 | 2.50949300  | 1.40801600  |
| C | -4.11006200 | -1.28619200 | -0.07629100 |
| C | 1.14243400  | 3.91661400  | -0.31419900 |
| C | -1.29363600 | 3.87601100  | -0.30596600 |
| H | -2.07613500 | -4.23654300 | -0.76547900 |
| C | 0.09337700  | -4.31033900 | -0.87760000 |
| H | -3.23948500 | -3.41664100 | 1.19548300  |
| H | -2.35460800 | -2.54508700 | 2.45701500  |
| H | 2.25719500  | -4.16935800 | -0.73791800 |
| H | 3.37409700  | -3.29539800 | 1.24127800  |
| H | 2.44330800  | -2.44565300 | 2.48511200  |
| H | 4.56633700  | -2.09031000 | -0.40928200 |
| C | 4.67218000  | 0.07920900  | -0.50248100 |
| H | 4.47144200  | 2.24016600  | -0.42027500 |
| H | 3.23708200  | 3.40061700  | 1.24320600  |
| H | 2.33280100  | 2.51293900  | 2.48159300  |
| H | -4.53872100 | 2.08919200  | -0.42668100 |
| C | -4.65432500 | -0.07864000 | -0.53251800 |
| H | -3.37418900 | 3.28035500  | 1.24854300  |
| H | -2.43438500 | 2.42955000  | 2.48533900  |
| H | -4.46049000 | -2.24081100 | -0.46298600 |
| H | 2.08681800  | 4.26637100  | -0.71553900 |
| C | -0.08246100 | 4.34179000  | -0.83863900 |
| H | -2.24788800 | 4.20417300  | -0.71197900 |
| N | 0.16612800  | -5.31225300 | -2.01361000 |
| N | 5.85556400  | 0.15460400  | -1.44641800 |
| N | -5.82149200 | -0.14201500 | -1.49719800 |
| N | -0.14722700 | 5.37431500  | -1.94766100 |
| C | 0.87030200  | -6.56888300 | -1.54365900 |
| C | -1.19109200 | -5.72169700 | -2.51795500 |
| C | 0.92033300  | -4.71798400 | -3.18081200 |
| C | 7.00230500  | 0.87982700  | -0.77156200 |
| C | 6.36290200  | -1.20237300 | -1.85289300 |
| C | 5.46923400  | 0.89026200  | -2.70824800 |
| C | -6.98116600 | -0.87183800 | -0.85040300 |
| C | -6.31930700 | 1.22018800  | -1.89841700 |
| C | -5.41401500 | -0.86529200 | -2.75964900 |
| C | -0.85129800 | 6.61937500  | -1.44756500 |
| C | 1.21338400  | 5.79462600  | -2.43351300 |
| C | -0.89626200 | 4.81368200  | -3.13447400 |
| H | 0.30894600  | -6.97673000 | -0.70302200 |
| H | 1.87672200  | -6.31277100 | -1.21912400 |
| H | 0.90922000  | -7.28606000 | -2.36680000 |

|   |             |             |             |
|---|-------------|-------------|-------------|
| H | -1.74727900 | -6.19380300 | -1.70918700 |
| H | -1.71765300 | -4.83856200 | -2.87772000 |
| H | -1.04947600 | -6.43114600 | -3.33426700 |
| H | 0.39622900  | -3.81641800 | -3.49834100 |
| H | 1.92745600  | -4.46018400 | -2.86034900 |
| H | 0.96045600  | -5.45066600 | -3.98998800 |
| H | 7.26490200  | 0.32996900  | 0.13220200  |
| H | 6.68022100  | 1.88434900  | -0.50502800 |
| H | 7.85083200  | 0.92336400  | -1.45828500 |
| H | 6.68175200  | -1.74561700 | -0.96446300 |
| H | 5.56680600  | -1.74273900 | -2.36379300 |
| H | 7.20949300  | -1.06064300 | -2.52600700 |
| H | 5.15128200  | 1.89789900  | -2.44909600 |
| H | 4.64204400  | 0.35344100  | -3.17300500 |
| H | 6.33144100  | 0.93123700  | -3.37780600 |
| H | -7.25966800 | -0.33002900 | 0.05346000  |
| H | -6.66564200 | -1.87947900 | -0.58772300 |
| H | -7.81699400 | -0.90750400 | -1.55293400 |
| H | -6.65081600 | 1.75555400  | -1.00981300 |
| H | -5.51405400 | 1.76357300  | -2.39139300 |
| H | -7.15548400 | 1.08689400  | -2.58608600 |
| H | -4.57682500 | -0.32597600 | -3.20311100 |
| H | -5.10375700 | -1.87655600 | -2.50525200 |
| H | -6.26377200 | -0.89650100 | -3.44545200 |
| H | -0.29414100 | 7.00217300  | -0.59249100 |
| H | -1.86034100 | 6.35708900  | -1.13636900 |
| H | -0.88327700 | 7.35913700  | -2.25079400 |
| H | 1.76552900  | 6.24431500  | -1.60938900 |
| H | 1.74084500  | 4.92044100  | -2.81328800 |
| H | 1.07742800  | 6.52556100  | -3.23161500 |
| H | -1.90546900 | 4.54895300  | -2.82630900 |
| H | -0.37178900 | 3.92038000  | -3.47402700 |
| H | -0.93128100 | 5.56795400  | -3.92386700 |

[MnL(O<sub>2</sub>)(H<sub>2</sub>O)]<sup>2+</sup> (Side-on)

Charge=2 S=3/2

Gibbs free energy: -3452.066645 Ha

|    |             |             |             |
|----|-------------|-------------|-------------|
| O  | -0.01600500 | -1.92804900 | 2.45418100  |
| O  | 1.92717400  | -0.03254400 | 2.53008900  |
| O  | -1.94490300 | 0.00271800  | 2.53583700  |
| O  | 0.00387700  | 1.89704200  | 2.44330200  |
| O  | -0.18263700 | -0.10595000 | 4.69063600  |
| O  | 0.65742600  | -0.02504900 | -0.06941700 |
| Mn | 0.00231600  | -0.00580000 | 2.41451300  |

|   |             |             |             |
|---|-------------|-------------|-------------|
| C | -0.01971300 | -2.61976800 | 1.34408100  |
| C | 2.70939100  | -0.03248100 | 1.48568600  |
| C | -2.71737600 | 0.01814700  | 1.48196500  |
| C | 0.01723000  | 2.60429800  | 1.34610500  |
| H | 0.19341400  | -0.92023900 | 5.05314100  |
| H | -1.13501000 | -0.11794800 | 4.86884100  |
| O | -0.66755800 | -0.00130100 | -0.06918100 |
| C | -1.25785900 | -2.99701000 | 0.75098900  |
| C | 1.21787000  | -3.02016200 | 0.75613600  |
| C | 3.13697800  | -1.26448200 | 0.90822700  |
| C | 3.14900500  | 1.20401000  | 0.91764100  |
| C | -3.13183800 | 1.25532200  | 0.90590600  |
| C | -3.15180000 | -1.21227600 | 0.89710600  |
| C | 1.25986000  | 2.99294000  | 0.77104800  |
| C | -1.21733100 | 3.01832500  | 0.76202900  |
| C | -1.24604400 | -3.86077200 | -0.34447800 |
| C | -2.57746700 | -2.54227900 | 1.38137400  |
| C | 1.18746400  | -3.88115000 | -0.33576100 |
| C | 2.54228700  | -2.58651600 | 1.39010200  |
| C | 4.14299100  | -1.25033200 | -0.05817600 |
| C | 4.15063800  | 1.17910800  | -0.04676300 |
| C | 2.57104000  | 2.52868200  | 1.41133200  |
| C | -4.12491100 | 1.24929200  | -0.07438000 |
| C | -2.53989700 | 2.57643400  | 1.39447200  |
| C | -4.14070700 | -1.17927700 | -0.08039100 |
| C | 1.25440100  | 3.87773900  | -0.30718700 |
| C | -1.18073600 | 3.90062600  | -0.31222400 |
| H | -2.19958900 | -4.17758400 | -0.75100200 |
| C | -0.03308700 | -4.30628300 | -0.87639500 |
| H | -3.32702300 | -3.32480500 | 1.20581200  |
| H | -2.41863400 | -2.47031600 | 2.46143100  |
| H | 2.13415500  | -4.22635800 | -0.74470300 |
| H | 3.27986900  | -3.38056700 | 1.21589500  |
| H | 2.38288600  | -2.51184500 | 2.47004700  |
| H | 4.50316500  | -2.20330500 | -0.42913000 |
| C | 4.66630200  | -0.03707100 | -0.51307400 |
| H | 4.53072900  | 2.12902500  | -0.41584800 |
| H | 3.32378900  | 3.31211500  | 1.25487800  |
| H | 2.39835500  | 2.44177500  | 2.48852400  |
| H | -4.47562600 | 2.20596700  | -0.44463500 |
| C | -4.64654300 | 0.04157500  | -0.54448100 |
| H | -3.28058100 | 3.36881500  | 1.22594500  |
| H | -2.37619100 | 2.49785000  | 2.47358900  |
| H | -4.51592100 | -2.12562600 | -0.46332800 |

|   |             |             |             |
|---|-------------|-------------|-------------|
| H | 2.21025600  | 4.20441800  | -0.70028400 |
| C | 0.04423700  | 4.33473400  | -0.83706800 |
| H | -2.12434500 | 4.25809400  | -0.71791300 |
| N | 0.00711000  | -5.31993800 | -2.00423200 |
| N | 5.84691500  | 0.00960100  | -1.46313200 |
| N | -5.80890400 | 0.00661900  | -1.51726400 |
| N | 0.01223800  | 5.37411300  | -1.94170200 |
| C | 0.68257900  | -6.58951200 | -1.52809300 |
| C | -1.36307200 | -5.69933900 | -2.49626900 |
| C | 0.76836900  | -4.75376100 | -3.18055800 |
| C | 7.01781400  | 0.69615300  | -0.78950600 |
| C | 6.31180500  | -1.35877600 | -1.88199400 |
| C | 5.47506900  | 0.76525700  | -2.71731200 |
| C | -6.99191500 | -0.68996900 | -0.87642200 |
| C | -6.26725800 | 1.38019400  | -1.92648000 |
| C | -5.41111900 | -0.73167600 | -2.77396400 |
| C | -0.66452500 | 6.63350400  | -1.44074700 |
| C | 1.38587700  | 5.76304500  | -2.41632900 |
| C | -0.74234000 | 4.83622600  | -3.13531300 |
| H | 0.11602400  | -6.97630200 | -0.68102900 |
| H | 1.69671300  | -6.35573800 | -1.21114800 |
| H | 0.69882100  | -7.31410800 | -2.34548200 |
| H | -1.92544200 | -6.14907400 | -1.67909100 |
| H | -1.86946700 | -4.80635500 | -2.86059900 |
| H | -1.24502100 | -6.41983700 | -3.30666300 |
| H | 0.26565300  | -3.84100500 | -3.50068000 |
| H | 1.78387600  | -4.51966900 | -2.86835300 |
| H | 0.78398700  | -5.49259100 | -3.98504100 |
| H | 7.26782500  | 0.13352200  | 0.10999200  |
| H | 6.72749700  | 1.70850800  | -0.51605100 |
| H | 7.86419000  | 0.71764700  | -1.47990600 |
| H | 6.62150200  | -1.91673300 | -0.99948200 |
| H | 5.49643500  | -1.87256500 | -2.38984900 |
| H | 7.15707500  | -1.23699400 | -2.56065500 |
| H | 5.18752400  | 1.77961300  | -2.44923000 |
| H | 4.63030600  | 0.25588200  | -3.18138500 |
| H | 6.33456700  | 0.78597500  | -3.39124500 |
| H | -7.26117000 | -0.13892600 | 0.02468100  |
| H | -6.70592000 | -1.70543700 | -0.61008700 |
| H | -7.82398900 | -0.70379800 | -1.58414100 |
| H | -6.59258500 | 1.92647200  | -1.04224500 |
| H | -5.44341400 | 1.90086600  | -2.41310700 |
| H | -7.10032900 | 1.26680600  | -2.62145600 |
| H | -4.55765700 | -0.21538200 | -3.21383200 |

|   |             |             |             |
|---|-------------|-------------|-------------|
| H | -5.12778200 | -1.74923100 | -2.51347800 |
| H | -6.25678100 | -0.74393500 | -3.46539900 |
| H | -0.10341700 | 6.99909700  | -0.58075000 |
| H | -1.68134700 | 6.39436600  | -1.13664300 |
| H | -0.67357500 | 7.37707000  | -2.24103700 |
| H | 1.94294100  | 6.19442500  | -1.58577300 |
| H | 1.89424900  | 4.87785500  | -2.79655300 |
| H | 1.27361700  | 6.50116900  | -3.21153100 |
| H | -1.75956900 | 4.59493600  | -2.83429100 |
| H | -0.23775500 | 3.93135000  | -3.47437000 |
| H | -0.75368400 | 5.59365600  | -3.92242400 |

[MnL(O<sub>2</sub>)(H<sub>2</sub>O)]<sup>2+</sup> (Side-on)

Charge=2 S=1/2

Gibbs free energy: -3452.024996 Ha

|    |             |             |             |
|----|-------------|-------------|-------------|
| O  | -0.01961100 | -1.93881200 | 2.41699000  |
| O  | 1.94295200  | -0.04731900 | 2.52130200  |
| O  | -1.93763100 | 0.00979500  | 2.52372100  |
| O  | 0.00974000  | 1.89146200  | 2.38562100  |
| O  | -0.07215200 | -0.10650600 | 4.34183900  |
| O  | 0.63480500  | -0.02871300 | 0.32510100  |
| Mn | 0.02097700  | -0.01104300 | 2.24256200  |
| C  | -0.02934300 | -2.62981200 | 1.31321000  |
| C  | 2.74630100  | -0.05117400 | 1.49716300  |
| C  | -2.74362200 | 0.02870100  | 1.49900900  |
| C  | 0.02641200  | 2.60458400  | 1.30060300  |
| H  | 0.12734000  | -1.03174100 | 4.55647100  |
| H  | -1.01515200 | 0.03528100  | 4.52780000  |
| O  | -0.69006300 | 0.00662800  | 0.15204600  |
| C  | -1.27384900 | -2.99105900 | 0.71893800  |
| C  | 1.20720000  | -3.02527500 | 0.71484700  |
| C  | 3.16511300  | -1.28505700 | 0.91106700  |
| C  | 3.18310200  | 1.18552900  | 0.91990800  |
| C  | -3.15709000 | 1.26800400  | 0.91930200  |
| C  | -3.18770600 | -1.20248300 | 0.91650000  |
| C  | 1.27408200  | 2.98250500  | 0.72345100  |
| C  | -1.20906200 | 3.02354600  | 0.71700100  |
| C  | -1.26886300 | -3.84319900 | -0.38506300 |
| C  | -2.58839900 | -2.53632200 | 1.36909900  |
| C  | 1.16739000  | -3.87234400 | -0.38718400 |
| C  | 2.53558000  | -2.60668300 | 1.36010900  |
| C  | 4.19309100  | -1.27361100 | -0.03235700 |
| C  | 4.20703700  | 1.15650800  | -0.02077100 |
| C  | 2.58003600  | 2.51478200  | 1.38144000  |

|   |             |             |             |
|---|-------------|-------------|-------------|
| C | -4.18022900 | 1.26229600  | -0.02973200 |
| C | -2.53070500 | 2.59175400  | 1.36793900  |
| C | -4.20618800 | -1.16653900 | -0.02985900 |
| C | 1.27152600  | 3.86669700  | -0.35444600 |
| C | -1.16727500 | 3.90550400  | -0.35668600 |
| H | -2.22459900 | -4.15300700 | -0.79256600 |
| C | -0.05842200 | -4.28905400 | -0.92638200 |
| H | -3.33785600 | -3.32039900 | 1.19922200  |
| H | -2.41001800 | -2.47451200 | 2.44666500  |
| H | 2.11025100  | -4.21853300 | -0.80489600 |
| H | 3.26393700  | -3.40886400 | 1.18325300  |
| H | 2.36519100  | -2.54446300 | 2.43917000  |
| H | 4.55295200  | -2.22708800 | -0.40317300 |
| C | 4.73608400  | -0.06149400 | -0.46953800 |
| H | 4.59399400  | 2.10509600  | -0.38684300 |
| H | 3.33343000  | 3.29937300  | 1.23243200  |
| H | 2.38591500  | 2.43560200  | 2.45572900  |
| H | -4.53318600 | 2.21909500  | -0.39828300 |
| C | -4.72633700 | 0.05563700  | -0.47659800 |
| H | -3.26639200 | 3.38917600  | 1.20039700  |
| H | -2.34805200 | 2.52828600  | 2.44514100  |
| H | -4.59360800 | -2.11201000 | -0.40327800 |
| H | 2.22802600  | 4.19017300  | -0.74953900 |
| C | 0.06162500  | 4.33267800  | -0.88259700 |
| H | -2.10812200 | 4.27099000  | -0.76264400 |
| N | -0.02647900 | -5.30214900 | -2.05535500 |
| N | 5.95811800  | -0.01790600 | -1.36599700 |
| N | -5.93551700 | 0.02303600  | -1.39056400 |
| N | 0.03475000  | 5.38106000  | -1.97925100 |
| C | 0.63976800  | -6.57704300 | -1.57963700 |
| C | -1.39984500 | -5.67172100 | -2.54614900 |
| C | 0.73793300  | -4.74404000 | -3.23317500 |
| C | 7.10405400  | 0.64439300  | -0.62724400 |
| C | 6.42497200  | -1.38689600 | -1.78140400 |
| C | 5.65808000  | 0.75887300  | -2.62588300 |
| C | -7.09296600 | -0.64673500 | -0.67744000 |
| C | -6.39545000 | 1.39715200  | -1.79725200 |
| C | -5.61627200 | -0.73949300 | -2.65456600 |
| C | -0.63037700 | 6.64197600  | -1.46619900 |
| C | 1.41002600  | 5.76348800  | -2.45425200 |
| C | -0.72734400 | 4.86141600  | -3.17590500 |
| H | 0.07182400  | -6.95828600 | -0.73103600 |
| H | 1.65627700  | -6.35082500 | -1.26478200 |
| H | 0.64873600  | -7.30255600 | -2.39637200 |

|   |             |             |             |
|---|-------------|-------------|-------------|
| H | -1.96389300 | -6.11947600 | -1.72908800 |
| H | -1.90133900 | -4.77492400 | -2.90800400 |
| H | -1.28774600 | -6.39143900 | -3.35809500 |
| H | 0.23915400  | -3.83074100 | -3.55792900 |
| H | 1.75454500  | -4.51357600 | -2.92178200 |
| H | 0.75089200  | -5.48557100 | -4.03522300 |
| H | 7.29938300  | 0.06971900  | 0.27814900  |
| H | 6.81394700  | 1.65814700  | -0.35832900 |
| H | 7.98489200  | 0.65980200  | -1.27340300 |
| H | 6.68833500  | -1.96000600 | -0.89362400 |
| H | 5.62713200  | -1.88413400 | -2.33199000 |
| H | 7.30103300  | -1.26738800 | -2.42028300 |
| H | 5.36896300  | 1.77315200  | -2.35944800 |
| H | 4.83344300  | 0.26482800  | -3.14002800 |
| H | 6.55047700  | 0.77922200  | -3.25549900 |
| H | -7.30356600 | -0.08107100 | 0.23020900  |
| H | -6.80756900 | -1.66331600 | -0.41423900 |
| H | -7.96304900 | -0.65561900 | -1.33807300 |
| H | -6.66942200 | 1.96093300  | -0.90668500 |
| H | -5.59014400 | 1.89931100  | -2.33217900 |
| H | -7.26341500 | 1.28540400  | -2.44846000 |
| H | -4.78258100 | -0.24085900 | -3.14932500 |
| H | -5.33274800 | -1.75714000 | -2.39487100 |
| H | -6.49843900 | -0.75114900 | -3.29868000 |
| H | -0.06499500 | 6.99449600  | -0.60360000 |
| H | -1.64877600 | 6.40872200  | -1.16280200 |
| H | -0.63418400 | 7.39298600  | -2.25961800 |
| H | 1.97161300  | 6.18585000  | -1.62214600 |
| H | 1.91194300  | 4.87738100  | -2.84090000 |
| H | 1.30149000  | 6.50734800  | -3.24463200 |
| H | -1.74448800 | 4.62118900  | -2.87365400 |
| H | -0.22815900 | 3.95882100  | -3.52879800 |
| H | -0.73887400 | 5.62786600  | -3.95428500 |

[MnL(O<sub>2</sub>)(H<sub>2</sub>O)]<sup>2+</sup>-1H<sub>2</sub>O

Charge=2 S=5/2

SCF energy: -3529.37616764 Ha

|    |             |             |            |
|----|-------------|-------------|------------|
| O  | 0.58700200  | -1.76666300 | 2.79266900 |
| O  | 1.71875600  | 0.73571100  | 2.79418300 |
| O  | -1.87033100 | -0.63271500 | 2.53516700 |
| O  | -0.76749600 | 1.83658800  | 2.56021500 |
| O  | -0.18831500 | 0.33889800  | 4.91546200 |
| O  | 0.00846900  | -0.25844800 | 0.29252400 |
| Mn | -0.07381800 | 0.03104200  | 2.63879600 |

|   |             |             |             |
|---|-------------|-------------|-------------|
| C | 0.91153400  | -2.45985200 | 1.72932900  |
| C | 2.45161100  | 0.93851400  | 1.72472500  |
| C | -2.50966700 | -0.93701700 | 1.44410300  |
| C | -0.96520200 | 2.47953200  | 1.44052200  |
| H | 0.69882100  | 0.38232200  | 5.30030900  |
| H | -0.61814100 | 1.18990800  | 5.08479800  |
| O | 0.47809200  | 0.50501700  | -0.67961900 |
| C | -0.06694300 | -3.25956100 | 1.06391100  |
| C | 2.24244900  | -2.41151000 | 1.22935800  |
| C | 3.29381300  | -0.09620900 | 1.23133100  |
| C | 2.40686800  | 2.19604900  | 1.05143700  |
| C | -3.31976700 | 0.04476100  | 0.79368500  |
| C | -2.45059500 | -2.26536800 | 0.92634400  |
| C | 0.07091100  | 3.29466800  | 0.89616000  |
| C | -2.23156500 | 2.40949300  | 0.78153100  |
| C | 0.31199900  | -4.00278500 | -0.04749200 |
| C | -1.50987900 | -3.28424400 | 1.56546000  |
| C | 2.58510800  | -3.17336900 | 0.11440100  |
| C | 3.26529100  | -1.48024900 | 1.87158700  |
| C | 4.10885200  | 0.15058700  | 0.12844500  |
| C | 3.23488800  | 2.40514800  | -0.04545200 |
| C | 1.45842600  | 3.29157900  | 1.53398300  |
| C | -4.16057400 | -0.35654600 | -0.23903300 |
| C | -3.32647700 | 1.48290000  | 1.30892100  |
| C | -3.31097100 | -2.62969900 | -0.10761700 |
| C | -0.21776100 | 4.14026100  | -0.17292600 |
| C | -2.47823100 | 3.26282500  | -0.28988700 |
| H | -0.44493600 | -4.60362000 | -0.54549000 |
| C | 1.62832900  | -3.96314200 | -0.52095900 |
| H | -1.91852000 | -4.28851400 | 1.39706200  |
| H | -1.49577800 | -3.10297000 | 2.64426500  |
| H | 3.60695600  | -3.11965300 | -0.24156900 |
| H | 4.26140900  | -1.93217700 | 1.78729900  |
| H | 3.02847100  | -1.37527900 | 2.93290200  |
| H | 4.74887000  | -0.65231100 | -0.21681300 |
| C | 4.08392900  | 1.39264700  | -0.50344300 |
| H | 3.19141200  | 3.36962900  | -0.54528800 |
| H | 1.92855600  | 4.26497400  | 1.34581000  |
| H | 1.33656500  | 3.18168100  | 2.61525200  |
| H | -4.82642600 | 0.38434300  | -0.67585300 |
| C | -4.17701500 | -1.68823800 | -0.67398300 |
| H | -4.29966700 | 1.92975200  | 1.06944800  |
| H | -3.23551300 | 1.44448300  | 2.39901000  |
| H | -3.29887900 | -3.66307800 | -0.43541700 |



|   |             |             |             |
|---|-------------|-------------|-------------|
| H | 0.56917600  | 4.79810100  | -0.52372200 |
| C | -1.48995800 | 4.14012300  | -0.75133800 |
| H | -3.47002300 | 3.25027300  | -0.73604200 |
| N | 1.95704300  | -4.72695200 | -1.78397400 |
| N | 4.90890500  | 1.65372600  | -1.74485100 |
| N | -5.22417100 | -2.09134100 | -1.69388500 |
| N | -1.86759500 | 5.13985100  | -1.82720600 |
| C | 3.41328500  | -4.64190900 | -2.15406800 |
| C | 1.62126300  | -6.19152500 | -1.61897100 |
| C | 1.16464300  | -4.13279000 | -2.93173200 |
| C | 5.76770000  | 2.88393200  | -1.55843900 |
| C | 5.83203500  | 0.51375400  | -2.08173000 |
| C | 3.97375700  | 1.84218400  | -2.92226200 |
| C | -5.13231400 | -3.54329200 | -2.08079500 |
| C | -6.60845400 | -1.86529400 | -1.11869100 |
| C | -5.06530700 | -1.27665100 | -2.95587900 |
| C | -2.96671700 | 6.04961200  | -1.31539300 |
| C | -0.71471700 | 6.01676900  | -2.23684100 |
| C | -2.34750300 | 4.41834400  | -3.06458700 |
| H | 4.01566300  | -5.02898100 | -1.33263300 |
| H | 3.66478000  | -3.60324300 | -2.36290000 |
| H | 3.56886700  | -5.24785900 | -3.04754500 |
| H | 2.21841600  | -6.58920000 | -0.79787200 |
| H | 0.56410100  | -6.29556200 | -1.38481900 |
| H | 1.85061800  | -6.71437900 | -2.54991500 |
| H | 0.10487700  | -4.28773600 | -2.73482100 |
| H | 1.37955300  | -3.06028600 | -2.97104700 |
| H | 1.45136900  | -4.63996300 | -3.85655000 |
| H | 6.42894800  | 2.71360400  | -0.70838700 |
| H | 5.13045900  | 3.74252100  | -1.35889200 |
| H | 6.34662200  | 3.05298800  | -2.46884100 |
| H | 6.49699000  | 0.32932100  | -1.23838800 |
| H | 5.23704300  | -0.37051200 | -2.30442600 |
| H | 6.41299400  | 0.79925500  | -2.95959800 |
| H | 3.36658600  | 2.72773000  | -2.74103300 |
| H | 3.32806000  | 0.96166800  | -2.98750600 |
| H | 4.57021800  | 1.97438400  | -3.82858900 |
| H | -5.29518600 | -4.16099400 | -1.19875100 |
| H | -4.14782400 | -3.73762500 | -2.50488200 |
| H | -5.90597100 | -3.74636100 | -2.82238800 |
| H | -6.69831300 | -2.46169200 | -0.21078900 |
| H | -6.72438000 | -0.81107800 | -0.87525600 |
| H | -7.35560200 | -2.16849900 | -1.85573600 |
| H | -5.18198800 | -0.22176900 | -2.71668000 |

|   |             |             |             |
|---|-------------|-------------|-------------|
| H | -4.06516800 | -1.45526200 | -3.35111600 |
| H | -5.82674000 | -1.58181500 | -3.67703300 |
| H | -2.59913300 | 6.55445100  | -0.42206100 |
| H | -3.83749800 | 5.44838800  | -1.06158000 |
| H | -3.22036800 | 6.77445200  | -2.09221000 |
| H | -0.37319400 | 6.58705700  | -1.37420200 |
| H | 0.08922400  | 5.39045400  | -2.62173600 |
| H | -1.06477200 | 6.69586800  | -3.01526300 |
| H | -3.21677400 | 3.81520800  | -2.81136500 |
| H | -1.54175400 | 3.77240300  | -3.41377300 |
| H | -2.61289200 | 5.15425500  | -3.82687100 |
| O | 1.57190100  | -0.72384500 | -2.82444800 |
| H | 0.99955900  | -0.45192000 | -3.55400500 |
| H | 1.13936100  | -0.36313000 | -1.98845800 |

[MnL(O<sub>2</sub>)(H<sub>2</sub>O)]<sup>2+</sup>-4H<sub>2</sub>O

Charge=2 S=5/2

SCF energy: -3758.77427747 Ha

|    |             |             |             |
|----|-------------|-------------|-------------|
| O  | -0.07100100 | -1.95366500 | 2.89968400  |
| O  | 2.00929900  | -0.22930500 | 2.73636800  |
| O  | 0.30554000  | 1.87574100  | 2.80444400  |
| O  | 0.29808100  | 0.10369700  | 5.11422200  |
| O  | 0.20563700  | -0.06158700 | 0.41255600  |
| Mn | 0.08445100  | -0.04693900 | 2.86771700  |
| C  | -0.20694100 | -2.64785000 | 1.79292200  |
| C  | 2.72514700  | -0.31483000 | 1.65305600  |
| C  | -2.57333700 | 0.23178100  | 1.88998000  |
| C  | 0.33710600  | 2.57507700  | 1.70155600  |
| H  | 1.05541100  | -0.35565800 | 5.50334500  |
| H  | 0.30774800  | 1.01653900  | 5.43588900  |
| O  | -0.53057200 | -0.37060900 | -0.64484800 |
| C  | -1.50452100 | -2.91322800 | 1.27320300  |
| C  | 0.94360400  | -3.14663600 | 1.11076200  |
| C  | 3.01180600  | -1.59448100 | 1.08036200  |
| C  | 3.25806400  | 0.86329400  | 1.04792500  |
| C  | -2.87322100 | 1.48397500  | 1.28021800  |
| C  | -3.14477000 | -0.96249700 | 1.36804500  |
| C  | 1.58059000  | 2.84570300  | 1.05519000  |
| C  | -0.87183700 | 3.10870200  | 1.15542900  |
| C  | -1.63698300 | -3.69485900 | 0.12599000  |
| C  | -2.73912000 | -2.31605000 | 1.94357500  |
| C  | 0.76959700  | -3.91902000 | -0.03508400 |
| C  | 2.34542800  | -2.84666100 | 1.64466600  |
| C  | 3.92646600  | -1.67544500 | 0.03387000  |

|   |             |             |             |
|---|-------------|-------------|-------------|
| C | 4.16626900  | 0.74131700  | -0.00416400 |
| C | 2.87541000  | 2.23753500  | 1.59473700  |
| C | -3.79016700 | 1.52639400  | 0.23102200  |
| C | -2.21590300 | 2.76371300  | 1.79313200  |
| C | -4.06057200 | -0.87965600 | 0.32143600  |
| C | 1.61053100  | 3.72575300  | -0.02930300 |
| C | -0.79896700 | 3.98005700  | 0.07201200  |
| H | -2.63668100 | -3.88971100 | -0.24223600 |
| C | -0.51035200 | -4.18937300 | -0.53129400 |
| H | -3.57633400 | -3.01491300 | 1.82840800  |
| H | -2.53797200 | -2.20035800 | 3.01159300  |
| H | 1.65452600  | -4.30493600 | -0.53449900 |
| H | 2.98942300  | -3.70893600 | 1.43280500  |
| H | 2.27685800  | -2.73830700 | 2.73081200  |
| H | 4.18083200  | -2.66082100 | -0.34801500 |
| C | 4.51417400  | -0.51950600 | -0.50339500 |
| H | 4.59540900  | 1.64998100  | -0.41025800 |
| H | 3.69671700  | 2.93395700  | 1.38565300  |
| H | 2.77767300  | 2.15256600  | 2.68097900  |
| H | -4.03340400 | 2.49416300  | -0.19457900 |
| C | -4.37859900 | 0.35375300  | -0.25211900 |
| H | -2.90447400 | 3.60066600  | 1.62492900  |
| H | -2.06721000 | 2.66300200  | 2.87201800  |
| H | -4.50411800 | -1.80037300 | -0.03779400 |
| H | 2.57432000  | 3.95283300  | -0.46957900 |
| C | 0.43109000  | 4.30026600  | -0.51634600 |
| H | -1.72330800 | 4.41868500  | -0.29389500 |
| N | -0.63657300 | -5.01013100 | -1.79565700 |
| N | 5.57898700  | -0.68527200 | -1.56732600 |
| N | -5.41656900 | 0.43939200  | -1.35059200 |
| N | 0.45174500  | 5.33134900  | -1.62547900 |
| C | 0.09699400  | -4.31852400 | -2.92862400 |
| C | -0.05949100 | -6.38941400 | -1.57205400 |
| C | -2.06847100 | -5.17387500 | -2.24358400 |
| C | 6.07377800  | 0.63230500  | -2.10557300 |
| C | 6.77096600  | -1.41451800 | -0.97949600 |
| C | 5.03752700  | -1.47355300 | -2.74262400 |
| C | -5.56452000 | -0.87272400 | -2.08813500 |
| C | -6.75417700 | 0.80436000  | -0.74481500 |
| C | -5.03821500 | 1.48324100  | -2.38271300 |
| C | -0.48268600 | 4.92801300  | -2.75027400 |
| C | 0.02473900  | 6.67302100  | -1.06780700 |
| C | 1.81909100  | 5.49986600  | -2.23756800 |
| H | 1.14628300  | -4.21191200 | -2.66220400 |

|   |             |             |             |
|---|-------------|-------------|-------------|
| H | -0.36009400 | -3.33804600 | -3.06953600 |
| H | -0.00176300 | -4.93131900 | -3.82737900 |
| H | 0.99014900  | -6.30013500 | -1.29763200 |
| H | -0.61131100 | -6.86493500 | -0.76065300 |
| H | -0.15798300 | -6.96772700 | -2.49301700 |
| H | -2.63055200 | -5.68874100 | -1.46485400 |
| H | -2.48158000 | -4.18667800 | -2.45324700 |
| H | -2.06144500 | -5.77963200 | -3.15077000 |
| H | 6.52866300  | 1.20424500  | -1.29796400 |
| H | 5.23611500  | 1.17778600  | -2.53952200 |
| H | 6.81979100  | 0.42366800  | -2.87312400 |
| H | 7.14891800  | -0.82819600 | -0.14179700 |
| H | 6.44950900  | -2.39256900 | -0.62610800 |
| H | 7.53676100  | -1.52403200 | -1.75046400 |
| H | 4.16252500  | -0.95591500 | -3.13731400 |
| H | 4.75224100  | -2.46770100 | -2.40533700 |
| H | 5.81916200  | -1.55204400 | -3.50089800 |
| H | -6.01712500 | -1.60892700 | -1.42591600 |
| H | -4.57866700 | -1.20728400 | -2.41734300 |
| H | -6.22770700 | -0.70514800 | -2.93760300 |
| H | -7.02278500 | 0.03859900  | -0.01684300 |
| H | -6.65734700 | 1.76731100  | -0.24383300 |
| H | -7.50375700 | 0.85966800  | -1.53774500 |
| H | -5.11157600 | 2.47221700  | -1.93449500 |
| H | -4.01572400 | 1.29657000  | -2.71813700 |
| H | -5.75003800 | 1.41500600  | -3.20687200 |
| H | -1.49494300 | 4.84011400  | -2.36172600 |
| H | -0.14273400 | 3.96944500  | -3.14396400 |
| H | -0.44835500 | 5.70282500  | -3.51878300 |
| H | -0.98252000 | 6.58501800  | -0.66413600 |
| H | 0.71635300  | 6.94884400  | -0.27135700 |
| H | 0.04640900  | 7.41385300  | -1.86992000 |
| H | 2.13705200  | 4.54433600  | -2.65464000 |
| H | 2.51498200  | 5.84968300  | -1.47610400 |
| H | 1.74013700  | 6.24551700  | -3.02951500 |
| O | 1.59063900  | -0.62791300 | -2.25488000 |
| H | 0.72608800  | -0.63529200 | -1.74831000 |
| H | 2.26181100  | -0.68068400 | -1.55861800 |
| O | 0.93514300  | 1.96678600  | -2.77279100 |
| H | 1.30864900  | 1.05345500  | -2.82537500 |
| H | 0.92366400  | 2.15445900  | -1.82035900 |
| O | -1.80713300 | 1.03196900  | -2.70787400 |
| H | -0.96286700 | 1.39982500  | -3.03585500 |
| H | -1.60885800 | 0.79957800  | -1.77946200 |

|   |             |             |             |
|---|-------------|-------------|-------------|
| O | -2.20649200 | -1.82019300 | -2.50817800 |
| H | -1.85530400 | -1.64252200 | -1.61607400 |
| H | -2.06759700 | -0.97423000 | -2.97554200 |
| O | -1.79984300 | 0.17842900  | 2.94886300  |

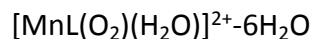

Charge=2 S=5/2

SCF energy: -3911.69937183 Ha

|    |             |             |             |
|----|-------------|-------------|-------------|
| O  | 1.94305800  | -0.45169200 | 2.84094300  |
| O  | 0.31047500  | 1.69022900  | 2.98253700  |
| O  | -1.84446000 | 0.05335000  | 2.98007400  |
| O  | 0.18440500  | -0.46490100 | 5.18040300  |
| O  | 0.19749500  | 0.03722800  | 0.49017700  |
| Mn | 0.03904900  | -0.19716000 | 2.93558800  |
| C  | 2.67388400  | -0.49063300 | 1.75947000  |
| C  | 0.39042600  | 2.46362800  | 1.92934200  |
| C  | -0.33136900 | -2.75220900 | 1.72557600  |
| C  | -2.60332500 | 0.19994100  | 1.92477900  |
| H  | -0.06914400 | -1.36354700 | 5.43679000  |
| H  | 1.06721900  | -0.29647300 | 5.53933200  |
| O  | -0.32660700 | -0.10030200 | -0.71821100 |
| C  | 2.92613000  | -1.73638000 | 1.11356100  |
| C  | 3.26731200  | 0.70533300  | 1.25173500  |
| C  | 1.66209300  | 2.74801100  | 1.34769700  |
| C  | -0.78589200 | 3.06290000  | 1.39203700  |
| C  | -1.62937600 | -2.97366200 | 1.17352200  |
| C  | 0.81729900  | -3.27305300 | 1.05907900  |
| C  | -2.86553400 | 1.50009200  | 1.40145900  |
| C  | -3.21544800 | -0.94171800 | 1.32817600  |
| C  | 3.89046900  | -1.79436700 | 0.10226500  |
| C  | 2.22147200  | -3.00165000 | 1.60467800  |
| C  | 4.22033000  | 0.60649900  | 0.24323600  |
| C  | 2.91997100  | 2.05686300  | 1.87392400  |
| C  | 1.74534400  | 3.71763500  | 0.35451700  |
| C  | -0.65981500 | 4.02621700  | 0.38699500  |
| C  | -2.15469800 | 2.72167100  | 1.98436900  |
| C  | -1.76090400 | -3.81186000 | 0.06873500  |
| C  | -2.86095200 | -2.34312800 | 1.82250900  |
| C  | 0.64154400  | -4.09969300 | -0.05192000 |
| C  | -3.83095200 | 1.64496000  | 0.40324100  |
| C  | -4.17449900 | -0.75381000 | 0.33618500  |
| H  | 4.12516700  | -2.76547700 | -0.31944300 |
| C  | 4.55200300  | -0.63345500 | -0.31939900 |
| H  | 2.85456300  | -3.86396500 | 1.36213200  |

|   |             |             |             |
|---|-------------|-------------|-------------|
| H | 2.14814400  | -2.93953400 | 2.69475200  |
| H | 4.71332100  | 1.51735500  | -0.08378200 |
| H | 3.77099500  | 2.73214700  | 1.72290900  |
| H | 2.79713300  | 1.91166300  | 2.95150300  |
| H | 2.72867500  | 3.96685400  | -0.03247000 |
| C | 0.59911300  | 4.36636500  | -0.11880400 |
| H | -1.56121000 | 4.52136900  | 0.04277600  |
| H | -2.81034000 | 3.59235900  | 1.86028100  |
| H | -2.02256900 | 2.55390000  | 3.05776500  |
| H | -2.76220900 | -4.02049200 | -0.29628500 |
| C | -0.63738100 | -4.38151900 | -0.53940500 |
| H | -3.72084300 | -3.00090500 | 1.64674900  |
| H | -2.69248700 | -2.29242400 | 2.90198700  |
| H | 1.52722200  | -4.51872200 | -0.51439000 |
| H | -4.06116400 | 2.64805700  | 0.06292600  |
| C | -4.49122000 | 0.52924000  | -0.12118000 |
| H | -4.67199700 | -1.63059700 | -0.06531600 |
| N | 5.71252000  | -0.69261400 | -1.29353300 |
| N | 0.77888100  | 5.53554400  | -1.06538700 |
| N | -0.84511800 | -5.36551100 | -1.67152900 |
| N | -5.61783500 | 0.68980200  | -1.11917700 |
| C | 5.53262300  | 0.30719900  | -2.41975800 |
| C | 6.99499900  | -0.38585800 | -0.54851700 |
| C | 5.86547800  | -2.04702500 | -1.93801000 |
| C | -0.52533600 | 6.03309400  | -1.63334400 |
| C | 1.42227000  | 6.67908400  | -0.30901700 |
| C | 1.65132600  | 5.16031300  | -2.24697500 |
| C | 0.43881300  | -5.69427800 | -2.39040300 |
| C | -1.41867500 | -6.64870300 | -1.11117600 |
| C | -1.78821100 | -4.80352300 | -2.71697300 |
| C | -5.54152400 | -0.37245800 | -2.19868100 |
| C | -6.94140400 | 0.56529900  | -0.39548500 |
| C | -5.58100300 | 2.03169900  | -1.81354200 |
| H | 5.47540400  | 1.31061800  | -2.00414500 |
| H | 4.61008700  | 0.05677800  | -2.94525300 |
| H | 6.39702000  | 0.23363100  | -3.08272100 |
| H | 6.92356200  | 0.61260500  | -0.12005100 |
| H | 7.11181000  | -1.11954400 | 0.24949700  |
| H | 7.83324700  | -0.43926400 | -1.24665400 |
| H | 6.07676400  | -2.79161500 | -1.17188700 |
| H | 4.95092900  | -2.28526200 | -2.48057800 |
| H | 6.70452800  | -1.99269600 | -2.63255100 |
| H | -1.15619800 | 6.40186900  | -0.82595200 |
| H | -1.00764600 | 5.21949800  | -2.17409400 |

|   |             |             |             |
|---|-------------|-------------|-------------|
| H | -0.29993600 | 6.84993300  | -2.31997300 |
| H | 0.77879600  | 6.94003700  | 0.53161700  |
| H | 2.39304100  | 6.35296900  | 0.06118700  |
| H | 1.53993700  | 7.53088300  | -0.98261700 |
| H | 1.14683200  | 4.37498300  | -2.81073500 |
| H | 2.61839300  | 4.81765300  | -1.88742400 |
| H | 1.78405900  | 6.05244700  | -2.86258400 |
| H | 1.11955800  | -6.19819100 | -1.70595800 |
| H | 0.86552800  | -4.76459600 | -2.76635800 |
| H | 0.19687900  | -6.36379300 | -3.21672500 |
| H | -0.72072100 | -7.04337900 | -0.37230800 |
| H | -2.37190400 | -6.42822700 | -0.63226800 |
| H | -1.56009300 | -7.36214600 | -1.92607000 |
| H | -2.75743200 | -4.61087600 | -2.26298800 |
| H | -1.34560400 | -3.88195800 | -3.09631200 |
| H | -1.89931900 | -5.54745400 | -3.50838100 |
| H | -5.79386900 | -1.33919600 | -1.76706200 |
| H | -4.52538300 | -0.39713400 | -2.59481500 |
| H | -6.27214800 | -0.12619300 | -2.97076800 |
| H | -6.98330000 | -0.41001900 | 0.08844600  |
| H | -6.99626300 | 1.35070200  | 0.35861600  |
| H | -7.75503300 | 0.66840900  | -1.11734600 |
| H | -4.59842200 | 2.16720000  | -2.26984800 |
| H | -5.78291400 | 2.81713700  | -1.08681600 |
| H | -6.36760700 | 2.03714700  | -2.56899600 |
| O | 1.32502900  | 1.30016700  | -2.46589200 |
| H | 0.69134500  | 0.91772200  | -1.80443900 |
| H | 0.83138600  | 1.88143600  | -3.07585900 |
| O | -0.28086600 | 3.13314800  | -3.94417500 |
| H | -1.12204300 | 2.77507800  | -3.56003600 |
| H | -0.36500500 | 3.15457600  | -4.90644500 |
| O | -2.26074500 | -0.66080100 | -2.52765900 |
| H | -1.86183800 | -0.63897800 | -1.62563200 |
| H | -1.58387300 | -1.12391500 | -3.05943900 |
| O | 0.08785100  | -2.22440600 | -2.86195100 |
| H | 0.95153600  | -1.86168000 | -3.16609900 |
| H | 0.05649600  | -1.97295800 | -1.92170500 |
| O | -0.20229200 | -2.10578400 | 2.85863100  |
| O | -2.28960100 | 2.04207900  | -2.54074600 |
| H | -2.28469500 | 1.06042100  | -2.69209900 |
| H | -1.99427900 | 2.14550600  | -1.62231100 |
| O | 2.54855600  | -0.98673700 | -2.91723500 |
| H | 2.14856100  | -0.07107600 | -2.91966400 |
| H | 2.71333100  | -1.16720700 | -1.97808000 |

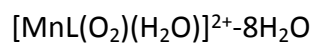

Charge=2 S=5/2

SCF energy: -4064.60246336 Ha

|    |             |             |             |
|----|-------------|-------------|-------------|
| O  | 1.87034200  | -0.12996300 | -3.18517100 |
| O  | -0.11000700 | -1.95899500 | -3.17134800 |
| O  | -1.93228600 | 0.05562100  | -3.12312500 |
| O  | -0.03794500 | 0.04619900  | -5.46837200 |
| O  | 0.18500600  | -0.13612600 | -0.69591600 |
| Mn | -0.03895400 | -0.04298300 | -3.23599600 |
| C  | 2.68093600  | -0.16128200 | -2.16321500 |
| C  | -0.13122600 | -2.61008800 | -2.03050600 |
| C  | 0.08685900  | 2.54347700  | -2.06950200 |
| C  | -2.72468700 | 0.09762800  | -2.09159500 |
| H  | 0.11737500  | 0.92016700  | -5.85394900 |
| H  | 0.45739500  | -0.60521500 | -5.98395500 |
| O  | -0.04940100 | 0.00696400  | 0.60047400  |
| C  | 3.19469900  | 1.05633000  | -1.62444000 |
| C  | 3.10187100  | -1.41032400 | -1.61802600 |
| C  | 1.09199800  | -3.03562500 | -1.42489200 |
| C  | -1.37269600 | -2.91551800 | -1.40258500 |
| C  | -1.12373700 | 2.97482200  | -1.44263400 |
| C  | 1.34226700  | 2.86809800  | -1.47647200 |
| C  | -3.23291000 | -1.11399700 | -1.53278900 |
| C  | -3.14606300 | 1.35469800  | -1.56553100 |
| C  | 4.23270400  | 0.99642800  | -0.69796000 |
| C  | 2.64837100  | 2.39505100  | -2.11934900 |
| C  | 4.16250400  | -1.42975700 | -0.70523800 |
| C  | 2.43470100  | -2.70355000 | -2.08273000 |
| C  | 1.04222400  | -3.78315200 | -0.25112800 |
| C  | -1.37804900 | -3.67686100 | -0.23016300 |
| C  | -2.69238700 | -2.45504100 | -2.02477400 |
| C  | -1.04794400 | 3.75114900  | -0.28769500 |
| C  | -2.48324900 | 2.63700200  | -2.06413000 |
| C  | 1.37193500  | 3.66703900  | -0.32954700 |
| C  | -4.27261800 | -1.04119600 | -0.60971700 |
| C  | -4.21459300 | 1.38670900  | -0.66102600 |
| H  | 4.64056500  | 1.93107900  | -0.32505400 |
| C  | 4.74462200  | -0.23275200 | -0.26580100 |
| H  | 3.41215800  | 3.16369900  | -1.95276400 |
| H  | 2.48278300  | 2.31659500  | -3.19774000 |
| H  | 4.53153700  | -2.39532300 | -0.37691600 |
| H  | 3.12417600  | -3.53686300 | -1.90145200 |
| H  | 2.27079800  | -2.63563600 | -3.16212600 |



|   |             |             |             |
|---|-------------|-------------|-------------|
| H | 1.97985800  | -4.12140100 | 0.18172600  |
| C | -0.18154900 | -4.10145800 | 0.35183100  |
| H | -2.33723600 | -3.92513100 | 0.20724500  |
| H | -3.45001200 | -3.22456300 | -1.83570700 |
| H | -2.54863200 | -2.38554200 | -3.10722000 |
| H | -1.97662100 | 4.09401300  | 0.16012000  |
| C | 0.18686000  | 4.09997300  | 0.27188400  |
| H | -3.16443600 | 3.47690200  | -1.88209400 |
| H | -2.34387000 | 2.54885200  | -3.14587200 |
| H | 2.34067000  | 3.94460100  | 0.06879100  |
| H | -4.68356900 | -1.97111600 | -0.22797200 |
| C | -4.79177400 | 0.19436000  | -0.20216600 |
| H | -4.59357800 | 2.35662200  | -0.35704500 |
| N | 5.92954500  | -0.22096700 | 0.67701400  |
| N | -0.17289000 | -4.95256900 | 1.60416500  |
| N | 0.20144400  | 4.99270900  | 1.49474400  |
| N | -5.98969500 | 0.19192800  | 0.72426100  |
| C | 5.54635000  | 0.42604500  | 1.99538100  |
| C | 6.44584500  | -1.60347500 | 0.98386300  |
| C | 7.07461300  | 0.55121400  | 0.05113900  |
| C | -1.55361500 | -5.15948400 | 2.18248100  |
| C | 0.39923000  | -6.31742500 | 1.28341600  |
| C | 0.66426100  | -4.29651100 | 2.68650500  |
| C | 1.59436100  | 5.24042200  | 2.02560000  |
| C | -0.39951300 | 6.33805600  | 1.14503800  |
| C | -0.59507500 | 4.36211300  | 2.62272800  |
| C | -6.49421800 | 1.57852000  | 1.03326400  |
| C | -7.13450500 | -0.56370100 | 0.07655100  |
| C | -5.63249300 | -0.46748800 | 2.04318600  |
| H | 4.77780600  | -0.18647700 | 2.46703700  |
| H | 5.14631500  | 1.42054500  | 1.80838300  |
| H | 6.43437200  | 0.48025500  | 2.62843800  |
| H | 5.66753800  | -2.17683600 | 1.48581800  |
| H | 6.74675000  | -2.09006300 | 0.05629900  |
| H | 7.30570700  | -1.50106300 | 1.64664000  |
| H | 7.32175200  | 0.08424700  | -0.90246100 |
| H | 6.76926100  | 1.58272300  | -0.11044800 |
| H | 7.92951800  | 0.51934700  | 0.72911300  |
| H | -2.16610300 | -5.70049400 | 1.46176900  |
| H | -1.99387100 | -4.19130800 | 2.42382500  |
| H | -1.44480100 | -5.75525000 | 3.08937300  |
| H | -0.21490100 | -6.77275900 | 0.50611800  |
| H | 1.42075900  | -6.20244100 | 0.92485500  |
| H | 0.38664800  | -6.92696400 | 2.18911400  |

|   |             |             |             |
|---|-------------|-------------|-------------|
| H | 0.22676300  | -3.32944500 | 2.92928300  |
| H | 1.68051700  | -4.15961600 | 2.32492300  |
| H | 0.66358700  | -4.94293500 | 3.56580400  |
| H | 2.18019100  | 5.75952600  | 1.26749900  |
| H | 2.05548200  | 4.28979100  | 2.29520000  |
| H | 1.50214000  | 5.87018300  | 2.91106600  |
| H | 0.18543800  | 6.77540400  | 0.33554200  |
| H | -1.42914100 | 6.19729800  | 0.82081500  |
| H | -0.36984200 | 6.97777200  | 2.02923700  |
| H | -1.61934100 | 4.19961000  | 2.29597000  |
| H | -0.13815900 | 3.40965300  | 2.88573900  |
| H | -0.57764100 | 5.03776200  | 3.47951300  |
| H | -6.78311500 | 2.07203700  | 0.10566500  |
| H | -5.71431800 | 2.14230800  | 1.54390900  |
| H | -7.36097500 | 1.48220900  | 1.68791600  |
| H | -7.36600700 | -0.08362700 | -0.87446200 |
| H | -6.83475300 | -1.59544200 | -0.09435500 |
| H | -7.99732000 | -0.53215500 | 0.74455100  |
| H | -4.84896600 | 0.12057600  | 2.52127500  |
| H | -5.26441000 | -1.47402700 | 1.85591400  |
| H | -6.52497300 | -0.49883800 | 2.67137600  |
| O | 2.10808300  | -0.90529400 | 1.75373500  |
| H | 2.65099200  | -1.21760700 | 1.01444700  |
| H | 1.22024200  | -0.65235500 | 1.34352700  |
| O | -2.20316200 | -1.75510600 | 2.15707600  |
| H | -1.59625700 | -1.88213400 | 1.41061100  |
| H | -2.36837300 | -0.78660100 | 2.15117000  |
| O | -2.17118400 | 1.00888000  | 1.75543800  |
| H | -2.82700800 | 1.27048300  | 1.09277100  |
| H | -1.34826600 | 0.76995900  | 1.23041100  |
| O | 2.38468200  | 1.83260500  | 2.03888900  |
| H | 1.79902900  | 2.02041500  | 1.28895200  |
| H | 2.44841400  | 0.84986600  | 2.04034400  |
| O | 0.04681200  | 1.88092400  | -3.20311500 |
| O | -1.35910100 | 1.41316400  | 4.45697500  |
| H | -1.42187000 | 0.48104100  | 4.77749200  |
| H | -1.71273600 | 1.39691700  | 3.54991300  |
| O | 1.54980500  | -1.21306300 | 4.53023900  |
| H | 1.82398400  | -1.23778000 | 3.59616800  |
| H | 1.62482200  | -0.26576900 | 4.79676700  |
| O | 1.40810200  | 1.56331000  | 4.72801700  |
| H | 0.42580400  | 1.62929400  | 4.69972600  |
| H | 1.73955600  | 1.84056900  | 3.85583400  |
| O | -1.21145400 | -1.33791700 | 4.83412400  |

|   |             |             |            |
|---|-------------|-------------|------------|
| H | -0.22892700 | -1.41337400 | 4.81707300 |
| H | -1.53783300 | -1.67162600 | 3.98023400 |

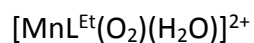

Charge=2 S=5/2

SCF energy: -3924.64826917 Ha

|    |             |             |             |
|----|-------------|-------------|-------------|
| O  | 1.76390500  | -0.82895200 | 2.93925700  |
| O  | 0.84166600  | 1.72783800  | 2.92880300  |
| O  | -0.80992900 | -1.75561500 | 2.96945200  |
| O  | -1.72507800 | 0.80498100  | 2.95557000  |
| O  | 0.10684500  | -0.26666400 | 5.20775800  |
| O  | 0.22858900  | 0.04680700  | 0.62295200  |
| Mn | 0.00682600  | -0.00191200 | 2.88834700  |
| C  | 2.41369200  | -1.13874500 | 1.85004900  |
| C  | 1.14532500  | 2.39337800  | 1.84990100  |
| C  | -1.13387800 | -2.40470500 | 1.88089400  |
| C  | -2.39357000 | 1.12476400  | 1.88029900  |
| H  | 1.01941500  | -0.51265600 | 5.41781900  |
| H  | -0.44952200 | -1.03171100 | 5.41478400  |
| O  | -0.63047700 | -0.23918300 | -0.34107300 |
| C  | 2.25256400  | -2.42449900 | 1.25691100  |
| C  | 3.30706200  | -0.19944500 | 1.25095300  |
| C  | 2.43138700  | 2.24853200  | 1.25225000  |
| C  | 0.20177800  | 3.29548300  | 1.27298400  |
| C  | -2.42608700 | -2.24697700 | 1.30288200  |
| C  | -0.19763700 | -3.29100800 | 1.27068600  |
| C  | -2.23982600 | 2.41106400  | 1.29027300  |
| C  | -3.30506300 | 0.19104200  | 1.30432200  |
| C  | 3.07628300  | -2.79536400 | 0.19530000  |
| C  | 1.22447300  | -3.40497300 | 1.82000700  |
| C  | 4.11169000  | -0.60993100 | 0.19371400  |
| C  | 3.41643600  | 1.22017000  | 1.80630300  |
| C  | 2.79620100  | 3.09087200  | 0.20468300  |
| C  | 0.60491900  | 4.11677400  | 0.22481700  |
| C  | -1.21033600 | 3.39265100  | 1.84883200  |
| C  | -2.80195600 | -3.06354800 | 0.23905700  |
| C  | -3.40661600 | -1.22340900 | 1.87260700  |
| C  | -0.60924000 | -4.08076500 | 0.20146700  |
| C  | -3.07458800 | 2.78086800  | 0.23649900  |
| C  | -4.12432900 | 0.60137800  | 0.25955500  |
| H  | 2.95175200  | -3.79445300 | -0.20256000 |
| C  | 4.03053400  | -1.91234700 | -0.32379700 |
| H  | 1.58373100  | -4.42527800 | 1.63369500  |
| H  | 1.17887100  | -3.26034100 | 2.90343200  |

|   |             |             |             |
|---|-------------|-------------|-------------|
| H | 4.80718700  | 0.11376100  | -0.21671000 |
| H | 4.43513700  | 1.58390200  | 1.62018500  |
| H | 3.27276700  | 1.17014200  | 2.88993000  |
| H | 3.79462000  | 2.97771200  | -0.19812500 |
| C | 1.90529200  | 4.04840300  | -0.29819700 |
| H | -0.12103500 | 4.81976900  | -0.16869900 |
| H | -1.58065700 | 4.41241400  | 1.68289200  |
| H | -1.14414000 | 3.23175500  | 2.92934400  |
| H | -3.80365000 | -2.93758900 | -0.15110400 |
| C | -1.91508400 | -4.00064000 | -0.30273900 |
| H | -4.42661000 | -1.59089900 | 1.70232200  |
| H | -3.24885600 | -1.16458100 | 2.95366100  |
| H | 0.11611200  | -4.76375200 | -0.22612800 |
| H | -2.95278800 | 3.77878900  | -0.16485400 |
| C | -4.03809100 | 1.89944200  | -0.26630000 |
| H | -4.82728500 | -0.12016000 | -0.14106000 |
| N | 5.00007900  | -2.33835500 | -1.40720200 |
| N | 2.32406700  | 5.03754800  | -1.36683900 |
| N | -2.32963300 | -4.92911500 | -1.42510700 |
| N | -4.99284300 | 2.31066700  | -1.36770900 |
| C | 6.43271500  | -2.51305900 | -0.85511300 |
| C | 4.61637500  | -3.68068900 | -2.05753400 |
| C | 5.02216800  | -1.30223100 | -2.53805500 |
| C | 2.50285300  | 6.45984900  | -0.78964200 |
| C | 3.66162000  | 4.66483200  | -2.03358500 |
| C | 1.28047000  | 5.08117400  | -2.49001500 |
| C | -2.45453000 | -6.39306100 | -0.94738300 |
| C | -3.69263600 | -4.55638500 | -2.03623600 |
| C | -1.30865500 | -4.85605100 | -2.56798700 |
| C | -6.43828800 | 2.47321000  | -0.84730400 |
| C | -4.61275700 | 3.65347600  | -2.01742800 |
| C | -4.97503100 | 1.26674800  | -2.49229300 |
| H | 6.33403100  | -3.23587100 | -0.04628600 |
| H | 6.99757500  | -2.97553300 | -1.67047200 |
| H | 3.54250300  | -3.62739700 | -2.22695000 |
| H | 5.10968200  | -3.67611300 | -3.03262500 |
| H | 5.34934500  | -0.36545000 | -2.09419600 |
| H | 5.80168200  | -1.63115000 | -3.23176100 |
| H | 3.23294800  | 6.34680200  | 0.01076700  |
| H | 2.95732200  | 7.04045600  | -1.59843300 |
| H | 3.60792700  | 3.59344300  | -2.21806000 |
| H | 3.64885700  | 5.17218400  | -3.00135000 |
| H | 0.34759100  | 5.40377800  | -2.03477000 |
| H | 1.60701600  | 5.87124400  | -3.17281700 |

|   |             |             |             |
|---|-------------|-------------|-------------|
| H | -3.16543500 | -6.35916200 | -0.12279300 |
| H | -2.91564400 | -6.92622400 | -1.78459400 |
| H | -3.66909400 | -3.47671000 | -2.17120300 |
| H | -3.69553200 | -5.01769900 | -3.02699800 |
| H | -0.35721100 | -5.17872500 | -2.15281800 |
| H | -1.62350200 | -5.60463000 | -3.30146900 |
| H | -6.36492400 | 3.20320700  | -0.04225400 |
| H | -6.99000500 | 2.92367100  | -1.67830600 |
| H | -3.53754400 | 3.60706500  | -2.17929900 |
| H | -5.09909300 | 3.64392200  | -2.99603800 |
| H | -5.31015800 | 0.33142900  | -2.05115100 |
| H | -5.73463700 | 1.58671300  | -3.21196000 |
| C | -3.61485200 | 1.07521600  | -3.15251200 |
| H | -3.29600600 | 1.94975700  | -3.72625400 |
| H | -2.84334200 | 0.82289300  | -2.41895600 |
| H | -3.70246300 | 0.24275700  | -3.85897800 |
| C | -5.00955100 | 4.93148400  | -1.27603400 |
| H | -4.50861300 | 5.76526400  | -1.78011800 |
| H | -6.08278000 | 5.12786900  | -1.32634200 |
| H | -4.70297400 | 4.94242300  | -0.22850900 |
| C | -7.17457900 | 1.23752400  | -0.34846200 |
| H | -7.28294000 | 0.45728000  | -1.10720700 |
| H | -6.72083900 | 0.81650100  | 0.54932300  |
| H | -8.18534800 | 1.56659500  | -0.08352100 |
| C | -1.16295200 | -3.47547000 | -3.19653600 |
| H | -2.05376100 | -3.16808200 | -3.75099100 |
| H | -0.92344300 | -2.71402000 | -2.44817100 |
| H | -0.33784600 | -3.52272500 | -3.91527000 |
| C | -4.94638500 | -4.99450300 | -1.27721800 |
| H | -5.80003700 | -4.49625900 | -1.74967200 |
| H | -5.12524900 | -6.06953200 | -1.34987600 |
| H | -4.93848700 | -4.71348900 | -0.22248900 |
| C | -1.19401200 | -7.12304400 | -0.50422100 |
| H | -0.43055300 | -7.18741400 | -1.28462300 |
| H | -0.76041200 | -6.69447800 | 0.39995100  |
| H | -1.49754900 | -8.14919100 | -0.26974400 |
| C | 3.68572500  | -1.10885100 | -3.24383200 |
| H | 3.38119800  | -1.98464300 | -3.82311800 |
| H | 2.89280200  | -0.85228700 | -2.53585200 |
| H | 3.79755200  | -0.27908100 | -3.94975100 |
| C | 7.16880600  | -1.27980900 | -0.35045300 |
| H | 7.30868100  | -0.51069900 | -1.11537400 |
| H | 6.69401400  | -0.84187600 | 0.52821800  |
| H | 8.16749900  | -1.61685200 | -0.05188500 |

|   |            |             |             |
|---|------------|-------------|-------------|
| C | 5.00032900 | -4.96118900 | -1.31357900 |
| H | 4.50074300 | -5.79169400 | -1.82437000 |
| H | 6.07311200 | -5.16216000 | -1.35385900 |
| H | 4.68362200 | -4.97309600 | -0.26922400 |
| C | 1.07806000 | 3.75754400  | -3.21708800 |
| H | 1.95022400 | 3.45816100  | -3.80450000 |
| H | 0.81981000 | 2.95440500  | -2.52138100 |
| H | 0.24645100 | 3.88521300  | -3.91817500 |
| C | 1.27358500 | 7.18427800  | -0.25913500 |
| H | 0.49781300 | 7.34022200  | -1.01417100 |
| H | 0.84370500 | 6.69067600  | 0.61310900  |
| H | 1.61284400 | 8.17652800  | 0.05784300  |
| C | 4.94793300 | 5.03957900  | -1.29498200 |
| H | 5.77456500 | 4.54826600  | -1.81990600 |
| H | 5.14728500 | 6.11307500  | -1.32173400 |
| H | 4.96898200 | 4.70829100  | -0.25535400 |

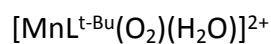

Charge=2 S=5/2

SCF energy: -4867.68352587 Ha

|    |             |             |            |
|----|-------------|-------------|------------|
| O  | -0.10640700 | 1.94126700  | 3.48053200 |
| O  | -1.90950700 | -0.09333100 | 3.45267100 |
| O  | 1.91777100  | 0.11737400  | 3.50245500 |
| O  | 0.10758900  | -1.91467600 | 3.49053300 |
| O  | 0.18331200  | 0.27619100  | 5.74309200 |
| O  | -0.18679700 | 0.12344300  | 1.15177900 |
| Mn | -0.00146400 | -0.00520600 | 3.41820600 |
| C  | -0.15385700 | 2.63261200  | 2.37187800 |
| C  | -2.67327500 | -0.13939500 | 2.39883000 |
| C  | 2.67733400  | 0.15094900  | 2.43851900 |
| C  | 0.15496700  | -2.61137100 | 2.38454800 |
| H  | -0.01114500 | 1.21844600  | 5.85642700 |
| H  | 1.12648200  | 0.15766100  | 5.92770400 |
| O  | 0.56728800  | -0.30356700 | 0.15264600 |
| C  | 1.03821600  | 3.09144900  | 1.74847100 |
| C  | -1.39797100 | 2.95452600  | 1.76267400 |
| C  | -3.19595700 | 1.05323700  | 1.83071700 |
| C  | -3.04186200 | -1.38232900 | 1.81652500 |
| C  | 3.19387500  | -1.04737300 | 1.87811500 |
| C  | 3.03525600  | 1.38585200  | 1.83494900 |
| C  | -1.03451500 | -3.07191200 | 1.75869000 |
| C  | 1.40208400  | -2.94646500 | 1.79262400 |
| C  | 0.95616400  | 3.96426900  | 0.66430500 |
| C  | 2.40362600  | 2.69458400  | 2.31933100 |

|   |             |             |             |
|---|-------------|-------------|-------------|
| C | -1.42089000 | 3.82219600  | 0.67574100  |
| C | -2.70791100 | 2.41039800  | 2.34017500  |
| C | -4.22301500 | 0.96986800  | 0.89348500  |
| C | -4.06272200 | -1.40842600 | 0.86852200  |
| C | -2.40365000 | -2.67861300 | 2.32189200  |
| C | 4.20990500  | -0.97358200 | 0.92834300  |
| C | 2.70496800  | -2.40399100 | 2.38732500  |
| C | 4.04111100  | 1.40134800  | 0.86967900  |
| C | -0.94568400 | -3.95121400 | 0.68079100  |
| C | 1.43226000  | -3.82323500 | 0.71313400  |
| H | 1.90335000  | 4.29719200  | 0.28465800  |
| C | -0.26545800 | 4.41120500  | 0.12295200  |
| H | 3.10929100  | 3.51009700  | 2.11309500  |
| H | 2.29417200  | 2.62212300  | 3.40648600  |
| H | -2.39500400 | 4.02729600  | 0.27852400  |
| H | -3.49727600 | 3.15084400  | 2.15495900  |
| H | -2.57957600 | 2.32884900  | 3.42450000  |
| H | -4.61392000 | 1.91614600  | 0.57007200  |
| C | -4.75338100 | -0.25563900 | 0.43794400  |
| H | -4.31868200 | -2.38174800 | 0.49775600  |
| H | -3.10233700 | -3.50285900 | 2.12716700  |
| H | -2.29543000 | -2.58704100 | 3.40808500  |
| H | 4.59871900  | -1.92271900 | 0.61174400  |
| C | 4.72719300  | 0.24539300  | 0.44527800  |
| H | 3.49725200  | -3.14303400 | 2.20954700  |
| H | 2.56283900  | -2.32581300 | 3.47012900  |
| H | 4.28585400  | 2.36975500  | 0.47970200  |
| H | -1.89060900 | -4.28555400 | 0.29749000  |
| C | 0.27831700  | -4.40647300 | 0.15269400  |
| H | 2.40908800  | -4.03559600 | 0.32675700  |
| N | -0.36621300 | 5.36960300  | -1.07941600 |
| N | -5.93993800 | -0.35493900 | -0.54172800 |
| N | 5.88845500  | 0.33042000  | -0.56557600 |
| N | 0.37941100  | -5.36698600 | -1.04833700 |
| C | -1.43718400 | 6.65846700  | -0.70730500 |
| C | 1.17945800  | 6.03129200  | -1.41009100 |
| C | -0.91960000 | 4.41912100  | -2.38892500 |
| C | -7.11269700 | -1.45740300 | 0.07968200  |
| C | -6.68501400 | 1.19102500  | -0.69216800 |
| C | -5.29218300 | -0.86548900 | -2.02279200 |
| C | 7.06670900  | 1.44994400  | -0.00177100 |
| C | 6.63951900  | -1.21368100 | -0.70209800 |
| C | 5.19543100  | 0.80416300  | -2.04116000 |
| C | 1.44255700  | -6.65900100 | -0.67292300 |

|   |             |             |             |
|---|-------------|-------------|-------------|
| C | -1.16892600 | -6.02313100 | -1.38432400 |
| C | 0.93923300  | -4.41766900 | -2.35415300 |
| C | 0.28913300  | -3.01670800 | -2.29855200 |
| H | -0.78963100 | -3.01787700 | -2.41604300 |
| H | 0.53562600  | -2.45566700 | -1.39566700 |
| H | 0.69506200  | -2.45987000 | -3.15067100 |
| C | -1.88756300 | -6.54502300 | -0.08969400 |
| H | -2.87736100 | -6.08789400 | -0.00936500 |
| H | -2.04640400 | -7.62358500 | -0.15595300 |
| H | -1.37483400 | -6.34057100 | 0.84223400  |
| C | 2.75816400  | -6.27110200 | 0.05319800  |
| H | 3.38051800  | -5.54637700 | -0.46325700 |
| H | 2.59333000  | -5.95187400 | 1.08073200  |
| H | 3.33956700  | -7.19797100 | 0.09618800  |
| C | 3.82510000  | 0.11198100  | -2.21734800 |
| H | 3.87321000  | -0.97033500 | -2.28072300 |
| H | 3.11241000  | 0.37683400  | -1.43527300 |
| H | 3.42181400  | 0.46618400  | -3.17253100 |
| C | 6.91242500  | -1.86614800 | 0.69883200  |
| H | 6.47631800  | -2.86813800 | 0.72548500  |
| H | 7.98653800  | -1.98606600 | 0.85552100  |
| H | 6.50820200  | -1.32999000 | 1.54844100  |
| C | 6.52707900  | 2.78884600  | 0.56977700  |
| H | 5.89223100  | 3.36434400  | -0.09735500 |
| H | 6.03825600  | 2.66988000  | 1.53503400  |
| H | 7.42133900  | 3.39764500  | 0.73886800  |
| C | -0.26269300 | 3.02138500  | -2.33529400 |
| H | 0.81402900  | 3.02510300  | -2.46888300 |
| H | -0.49284000 | 2.47043400  | -1.42315800 |
| H | -0.68008400 | 2.45552600  | -3.17551000 |
| C | -2.75236200 | 6.26443000  | 0.01607900  |
| H | -3.37156400 | 5.53811600  | -0.50203200 |
| H | -2.58805700 | 5.94402400  | 1.04335000  |
| H | -3.33737400 | 7.18899000  | 0.05963700  |
| C | 1.89177800  | 6.55772600  | -0.11364900 |
| H | 2.88235600  | 6.10330600  | -0.02834900 |
| H | 2.04823400  | 7.63651500  | -0.18190600 |
| H | 1.37566800  | 6.35431100  | 0.81655700  |
| C | -3.92024500 | -0.19072700 | -2.24421100 |
| H | -3.95006500 | 0.89329900  | -2.27720500 |
| H | -3.18556700 | -0.48937900 | -1.49598700 |
| H | -3.56078900 | -0.52903000 | -3.22239600 |
| C | -6.56297500 | -2.78560400 | 0.66387200  |
| H | -5.95195800 | -3.37917000 | -0.00971500 |



|   |             |             |             |
|---|-------------|-------------|-------------|
| H | -6.04481800 | -2.64893000 | 1.61129300  |
| H | -7.45485400 | -3.38548400 | 0.87293100  |
| C | -6.92255600 | 1.87418700  | 0.70028000  |
| H | -6.47706700 | 2.87250300  | 0.69747700  |
| H | -7.99209100 | 2.00746700  | 0.87633600  |
| H | -6.50605300 | 1.35102100  | 1.55191200  |
| C | -7.82450500 | -0.82408900 | 1.28754400  |
| H | -8.48789600 | 0.00254100  | 1.05254700  |
| H | -8.45003400 | -1.60659400 | 1.72761400  |
| H | -7.11369200 | -0.52068300 | 2.05788800  |
| C | -8.14351300 | -1.88847400 | -0.98846800 |
| H | -7.75451400 | -2.65908700 | -1.65496700 |
| H | -8.97852400 | -2.34319900 | -0.44519100 |
| H | -8.56463500 | -1.09572300 | -1.59171600 |
| C | -8.07137400 | 1.16137200  | -1.37655600 |
| H | -8.84538200 | 0.68181300  | -0.78190000 |
| H | -8.36958300 | 2.21152000  | -1.46457600 |
| H | -8.08225300 | 0.75124400  | -2.38283700 |
| C | -5.84364400 | 2.16960900  | -1.55290000 |
| H | -5.80980800 | 1.91301500  | -2.60836400 |
| H | -6.35586500 | 3.13445000  | -1.48712100 |
| H | -4.82750400 | 2.32073700  | -1.20210900 |
| C | -5.00257800 | -2.38255000 | -2.06037500 |
| H | -5.89243000 | -3.00735100 | -2.02794900 |
| H | -4.52927300 | -2.57183800 | -3.02900400 |
| H | -4.29268300 | -2.70441800 | -1.30386900 |
| C | -6.20089400 | -0.60686600 | -3.24502200 |
| H | -6.37359200 | 0.43965800  | -3.47830200 |
| H | -5.67784600 | -1.02656700 | -4.11025100 |
| H | -7.15944500 | -1.11864100 | -3.18645500 |
| C | -2.44062400 | 4.15266400  | -2.33439400 |
| H | -2.65998500 | 3.51280000  | -3.19477300 |
| H | -2.74612300 | 3.59582900  | -1.45293900 |
| H | -3.05624300 | 5.04195000  | -2.44896300 |
| C | -0.67218100 | 5.04804200  | -3.77726300 |
| H | 0.37310400  | 5.13640600  | -4.05864700 |
| H | -1.12279800 | 4.36710900  | -4.50630400 |
| H | -1.15916400 | 6.01177000  | -3.91201900 |
| C | -1.88743600 | 7.44077300  | -1.96215400 |
| H | -2.65632700 | 6.91709800  | -2.53084400 |
| H | -2.35033100 | 8.36396600  | -1.59864700 |
| H | -1.10208900 | 7.74017900  | -2.64407900 |
| C | -0.77388800 | 7.61612300  | 0.30015800  |
| H | 0.06178900  | 8.18954800  | -0.08820400 |

|   |             |             |             |
|---|-------------|-------------|-------------|
| H | -1.53904300 | 8.34200900  | 0.59064600  |
| H | -0.47275000 | 7.09553600  | 1.21075400  |
| C | 2.12677600  | 4.99944800  | -2.07477500 |
| H | 1.87038300  | 4.76709500  | -3.10539500 |
| H | 3.11064100  | 5.47787100  | -2.10488800 |
| H | 2.23366700  | 4.06854700  | -1.52713400 |
| C | 1.16146700  | 7.23276800  | -2.38368000 |
| H | 0.71343400  | 8.13151500  | -1.96610400 |
| H | 2.21500100  | 7.47576700  | -2.55887600 |
| H | 0.72396600  | 7.02992000  | -3.35711900 |
| C | 0.69428400  | -5.04526400 | -3.74371600 |
| H | -0.35009600 | -5.12746100 | -4.03047200 |
| H | 1.15277100  | -4.36715900 | -4.47043100 |
| H | 1.17598900  | -6.01201400 | -3.87602600 |
| C | 2.46062300  | -4.15843200 | -2.29426500 |
| H | 3.07302400  | -5.04909200 | -2.41707100 |
| H | 2.68369200  | -3.50973800 | -3.14703900 |
| H | 2.76501600  | -3.61204300 | -1.40632400 |
| C | -1.15082000 | -7.22601000 | -2.35622700 |
| H | -2.20430800 | -7.46790200 | -2.53312300 |
| H | -0.71128000 | -7.02435400 | -3.32907300 |
| H | -0.70477100 | -8.12485800 | -1.93685300 |
| C | -2.11177300 | -4.99068500 | -2.05563500 |
| H | -3.09447000 | -5.47100100 | -2.09423900 |
| H | -2.22535300 | -4.06047900 | -1.50806600 |
| H | -1.84723300 | -4.75621500 | -3.08361200 |
| C | 1.89351300  | -7.44389900 | -1.92613500 |
| H | 2.67101400  | -6.92617900 | -2.48868400 |
| H | 2.34541700  | -8.37201900 | -1.56128300 |
| H | 1.11025500  | -7.73446300 | -2.61411100 |
| C | 0.77287500  | -7.61294000 | 0.33396900  |
| H | -0.06346500 | -8.18431800 | -0.05601400 |
| H | 1.53464500  | -8.34085600 | 0.62825600  |
| H | 0.47049700  | -7.08982500 | 1.24270300  |
| C | 6.07623500  | 0.53022600  | -3.28009200 |
| H | 6.25731700  | -0.51905400 | -3.49351600 |
| H | 5.52415400  | 0.92190500  | -4.14048100 |
| H | 7.02854600  | 1.05638900  | -3.25942900 |
| C | 4.89192800  | 2.31755700  | -2.09755100 |
| H | 4.39724500  | 2.48689600  | -3.05903300 |
| H | 4.19457700  | 2.64378400  | -1.33141900 |
| H | 5.77657300  | 2.95045300  | -2.09342900 |
| C | 8.00886800  | -1.19055300 | -1.41958200 |
| H | 8.31159000  | -2.24066900 | -1.49136800 |

|   |            |             |             |
|---|------------|-------------|-------------|
| H | 7.99225900 | -0.80330700 | -2.43499800 |
| H | 8.79417900 | -0.69271000 | -0.85565700 |
| C | 5.78480400 | -2.21387800 | -1.52350400 |
| H | 6.29849500 | -3.17672500 | -1.44182500 |
| H | 4.77423600 | -2.35497300 | -1.15393900 |
| H | 5.73520000 | -1.98373500 | -2.58447300 |
| C | 8.06723000 | 1.86511900  | -1.10468900 |
| H | 7.65756800 | 2.62257700  | -1.77390000 |
| H | 8.91451600 | 2.33305100  | -0.59248200 |
| H | 8.47575100 | 1.06371900  | -1.70512700 |
| C | 7.81478400 | 0.84834500  | 1.20131700  |
| H | 8.47846700 | 0.02144100  | 0.96809500  |
| H | 8.44496400 | 1.64473900  | 1.60849500  |
| H | 7.12582400 | 0.55599800  | 1.99544000  |

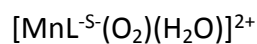

Charge=2 S=5/2

SCF energy: -4888.48110846 Ha

|    |             |             |             |
|----|-------------|-------------|-------------|
| Mn | -0.01988900 | -0.00958700 | -2.14149400 |
| O  | -0.24467300 | -0.17156400 | -0.06886600 |
| O  | 0.60973800  | 0.38615100  | 0.73149300  |
| O  | -0.43385100 | -2.06407500 | -2.27156800 |
| O  | -1.91049600 | 0.36997500  | -2.19968600 |
| O  | 1.83806800  | -0.41185700 | -2.12190200 |
| O  | 0.38471800  | 1.97784800  | -2.19051700 |
| O  | -0.13000200 | -0.25060800 | -4.30854100 |
| C  | -0.57999100 | -2.80797300 | -1.25416900 |
| C  | -2.72436000 | 0.53570000  | -1.21525700 |
| C  | 2.68757200  | -0.56230200 | -1.16994500 |
| C  | 0.54752300  | 2.77153700  | -1.21594200 |
| H  | -0.89176100 | 0.20736700  | -4.69313300 |
| H  | -0.26496400 | -1.20440400 | -4.43169000 |
| C  | 0.52994500  | -3.49091600 | -0.63155400 |
| C  | -1.88002100 | -3.01746900 | -0.65222200 |
| C  | -3.46437700 | -0.56610800 | -0.66679600 |
| C  | -2.97330900 | 1.84059700  | -0.65908800 |
| C  | 3.43902100  | 0.54284500  | -0.64651700 |
| C  | 2.96832900  | -1.86970400 | -0.63839200 |
| C  | -0.55558000 | 3.49415100  | -0.63300000 |
| C  | 1.85374400  | 3.01071900  | -0.64349900 |
| C  | 0.32047000  | -4.43167300 | 0.37508700  |
| C  | -2.05780200 | -3.96211600 | 0.34843700  |
| C  | -4.47974600 | -0.34826100 | 0.26693200  |
| C  | -3.99268400 | 2.02292200  | 0.27128100  |

|   |             |             |            |
|---|-------------|-------------|------------|
| C | 4.48533600  | 0.32307700  | 0.25150900 |
| C | 4.01944000  | -2.05484500 | 0.25486200 |
| C | -0.34075700 | 4.48379800  | 0.32483600 |
| C | 2.03806700  | 4.00306900  | 0.30751900 |
| H | 1.18877300  | -4.95710600 | 0.75222300 |
| C | -0.96874900 | -4.69029800 | 0.84958500 |
| H | -3.06731500 | -4.12814400 | 0.71247600 |
| H | -5.04112800 | -1.21185600 | 0.59870900 |
| C | -4.75951400 | 0.94172900  | 0.71818600 |
| H | -4.18319600 | 3.03528400  | 0.61268000 |
| H | 5.05096400  | 1.18773800  | 0.57274300 |
| C | 4.79026000  | -0.96865800 | 0.68304400 |
| H | 4.23112400  | -3.06851900 | 0.57970700 |
| H | -1.20485000 | 5.03287900  | 0.67733900 |
| C | 0.95241500  | 4.75869900  | 0.77812400 |
| H | 3.04947200  | 4.18400800  | 0.65868300 |
| N | -1.24445500 | -5.79036200 | 1.85018300 |
| N | -5.91857500 | 1.22335300  | 1.64987000 |
| N | 5.98283200  | -1.24452800 | 1.57354800 |
| N | 1.23699000  | 5.89837400  | 1.73043900 |
| C | -2.13442500 | -6.84291200 | 1.21826800 |
| C | 0.01126500  | -6.48147100 | 2.31212900 |
| C | -1.92702000 | -5.22565300 | 3.07502500 |
| C | -6.91965400 | 2.12679800  | 0.95556100 |
| C | -6.65008900 | -0.02779900 | 2.06099600 |
| C | -5.42305600 | 1.89581700  | 2.91069500 |
| C | 6.96801600  | -2.13490000 | 0.84099100 |
| C | 6.71663000  | 0.01118400  | 1.96645500 |
| C | 5.53623600  | -1.92757500 | 2.84674300 |
| C | 2.13430000  | 6.91674900  | 1.05435600 |
| C | -0.01284400 | 6.61773800  | 2.16292600 |
| C | 1.91655100  | 5.38048900  | 2.97795600 |
| H | -1.62133800 | -7.23770500 | 0.34133300 |
| H | -3.07186700 | -6.38051200 | 0.91484600 |
| H | -2.32190400 | -7.63551600 | 1.94621300 |
| H | 0.50651000  | -6.93821700 | 1.45609600 |
| H | 0.66630800  | -5.75156000 | 2.78679500 |
| H | -0.27175300 | -7.25170300 | 3.03065000 |
| H | -1.27107900 | -4.47219800 | 3.51141900 |
| H | -2.86839500 | -4.76672700 | 2.77955900 |
| H | -2.11412500 | -6.03467600 | 3.78445000 |
| H | -7.26337600 | 1.62151300  | 0.05287700 |
| H | -6.43122400 | 3.06182900  | 0.68769200 |
| H | -7.75444800 | 2.31710700  | 1.63351200 |

|   |             |             |             |
|---|-------------|-------------|-------------|
| H | -7.05756600 | -0.51424600 | 1.17551500  |
| H | -5.95878700 | -0.69268000 | 2.57782400  |
| H | -7.46080700 | 0.26042200  | 2.73104000  |
| H | -4.94096700 | 2.83586600  | 2.64976700  |
| H | -4.70231500 | 1.23234800  | 3.38913500  |
| H | -6.27294500 | 2.08356300  | 3.57012600  |
| H | 7.27653000  | -1.62153800 | -0.06983400 |
| H | 6.47950500  | -3.07294300 | 0.58400800  |
| H | 7.82686500  | -2.32132000 | 1.48937600  |
| H | 7.08953500  | 0.50527100  | 1.07010100  |
| H | 6.03722600  | 0.66738400  | 2.50946100  |
| H | 7.55198200  | -0.27326600 | 2.60717100  |
| H | 4.82495200  | -1.27355300 | 3.35162000  |
| H | 5.05546800  | -2.87138500 | 2.59709400  |
| H | 6.40935100  | -2.10950500 | 3.47691700  |
| H | 1.62300600  | 7.27852400  | 0.16226600  |
| H | 3.06775100  | 6.43504800  | 0.76935100  |
| H | 2.32877300  | 7.73723300  | 1.74877400  |
| H | -0.50523000 | 7.04097200  | 1.28818100  |
| H | -0.67290100 | 5.91363700  | 2.66856700  |
| H | 0.27589400  | 7.41579900  | 2.84793300  |
| H | 2.85452200  | 4.90290600  | 2.70183300  |
| H | 1.25596400  | 4.64988900  | 3.44510900  |
| H | 2.10924800  | 6.21705800  | 3.65316300  |
| S | 2.19151400  | -3.35383300 | -1.31477500 |
| S | -3.34193000 | -2.23338700 | -1.35393600 |
| S | -2.20819400 | 3.33502700  | -1.32968900 |
| S | 3.30981700  | 2.20898000  | -1.33439000 |

[MnL(O<sub>2</sub>)(H<sub>2</sub>O)]<sup>2+</sup> (in water)

Charge=2 S=5/2

SCF energy: -3453.14138349 Ha

|    |             |             |            |
|----|-------------|-------------|------------|
| O  | 1.59099600  | -1.15091200 | 2.66865600 |
| O  | 1.15169400  | 1.55638400  | 2.69235100 |
| O  | -1.12357800 | -1.58036200 | 2.64687200 |
| O  | -1.54980600 | 1.11512300  | 2.66436400 |
| O  | 0.02319000  | -0.29362100 | 4.97928000 |
| O  | 0.29132500  | 0.03035800  | 0.31816100 |
| Mn | 0.01261500  | -0.01230000 | 2.57081200 |
| C  | 2.17505400  | -1.56322400 | 1.55695700 |
| C  | 1.57999200  | 2.14689100  | 1.59022400 |
| C  | -1.54770900 | -2.15045800 | 1.53081800 |
| C  | -2.13550700 | 1.55035100  | 1.56124100 |
| H  | 0.88005400  | -0.70259300 | 5.17321900 |

|   |             |             |             |
|---|-------------|-------------|-------------|
| H | -0.64226900 | -0.98222900 | 5.12863700  |
| O | -0.54281700 | -0.08599400 | -0.70197400 |
| C | 1.76588700  | -2.77566500 | 0.93820200  |
| C | 3.21910500  | -0.78899700 | 0.97117600  |
| C | 2.81058600  | 1.75097100  | 0.99674700  |
| C | 0.81054500  | 3.18612400  | 0.99067500  |
| C | -2.77787000 | -1.74877700 | 0.94441200  |
| C | -0.77943400 | -3.18566300 | 0.92449400  |
| C | -1.73548300 | 2.78377900  | 0.98003200  |
| C | -3.18709300 | 0.79551000  | 0.96637300  |
| C | 2.44779500  | -3.23355300 | -0.19278400 |
| C | 0.58565400  | -3.57243500 | 1.49206300  |
| C | 3.87823900  | -1.27817900 | -0.15323000 |
| C | 3.59893700  | 0.56900900  | 1.55916300  |
| C | 3.28871700  | 2.44068000  | -0.11959200 |
| C | 1.31708800  | 3.84859100  | -0.12550400 |
| C | -0.55653300 | 3.56610200  | 1.55695800  |
| C | -3.26784100 | -2.44304900 | -0.16434500 |
| C | -3.56750300 | -0.57556300 | 1.52239400  |
| C | -1.29501600 | -3.85020200 | -0.18629600 |
| C | -2.43977800 | 3.28491100  | -0.11840400 |
| C | -3.87283400 | 1.33024300  | -0.12124200 |
| H | 2.13262600  | -4.17283700 | -0.62993300 |
| C | 3.50165600  | -2.49608800 | -0.73073900 |
| H | 0.75709000  | -4.63501900 | 1.28394200  |
| H | 0.55810100  | -3.44191200 | 2.57714600  |
| H | 4.68880100  | -0.68859600 | -0.57067600 |
| H | 4.66497300  | 0.74202700  | 1.37104500  |
| H | 3.44804000  | 0.53361100  | 2.64115500  |
| H | 4.24040400  | 2.13526100  | -0.53634600 |
| C | 2.55111400  | 3.48668200  | -0.67482900 |
| H | 0.72931000  | 4.65488700  | -0.55365300 |
| H | -0.72394900 | 4.63298200  | 1.36872300  |
| H | -0.53677000 | 3.41373200  | 2.63944800  |
| H | -4.22433000 | -2.13974000 | -0.57168300 |
| C | -2.53597200 | -3.49088800 | -0.72255200 |
| H | -4.63246000 | -0.74450500 | 1.32498400  |
| H | -3.42398600 | -0.56142000 | 2.60636900  |
| H | -0.71212000 | -4.65839700 | -0.61745500 |
| H | -2.13581200 | 4.24216200  | -0.52324400 |
| C | -3.50724700 | 2.56872700  | -0.65963100 |
| H | -4.69589700 | 0.75916800  | -0.54015000 |
| N | 4.27635600  | -2.98766300 | -1.93075100 |
| N | 3.06130000  | 4.26765100  | -1.86299800 |

|   |             |             |             |
|---|-------------|-------------|-------------|
| N | -3.05774000 | -4.27559000 | -1.90355900 |
| N | -4.30854200 | 3.10721800  | -1.82160500 |
| C | 5.73075700  | -3.18517100 | -1.55539600 |
| C | 3.76322300  | -4.30321400 | -2.46017300 |
| C | 4.17871900  | -1.97828600 | -3.05582200 |
| C | 3.23292500  | 5.72422200  | -1.48323700 |
| C | 4.39474300  | 3.77027100  | -2.36195800 |
| C | 2.07989800  | 4.15844600  | -3.01149200 |
| C | -3.21493100 | -5.73328700 | -1.52212800 |
| C | -4.40143000 | -3.78727700 | -2.38353500 |
| C | -2.09270900 | -4.15900800 | -3.06503200 |
| C | -5.75351900 | 3.29137700  | -1.40535400 |
| C | -3.80563500 | 4.44177800  | -2.31161700 |
| C | -4.23814500 | 2.14269300  | -2.98739600 |
| H | 5.77617100  | -3.91467300 | -0.74738800 |
| H | 6.14815300  | -2.23580200 | -1.22700200 |
| H | 6.26936900  | -3.54775700 | -2.43171500 |
| H | 3.85762700  | -5.06358800 | -1.68662000 |
| H | 2.72449300  | -4.18721600 | -2.76535300 |
| H | 4.37424300  | -4.57349300 | -3.32062900 |
| H | 3.12650300  | -1.85407000 | -3.30985300 |
| H | 4.59890500  | -1.03064800 | -2.72673100 |
| H | 4.73901800  | -2.35743700 | -3.91124200 |
| H | 3.93964100  | 5.77779400  | -0.65569400 |
| H | 2.27058000  | 6.13153900  | -1.18093200 |
| H | 3.61345800  | 6.26631500  | -2.34974400 |
| H | 5.13610900  | 3.87357800  | -1.57127000 |
| H | 4.29810400  | 2.73034500  | -2.66971700 |
| H | 4.67728600  | 4.38467200  | -3.21605500 |
| H | 1.11960500  | 4.56656400  | -2.70478500 |
| H | 1.97480800  | 3.10494800  | -3.26891500 |
| H | 2.47226700  | 4.72401000  | -3.85743300 |
| H | -3.91107400 | -5.79160300 | -0.68597000 |
| H | -2.24655600 | -6.13500000 | -1.23194800 |
| H | -3.60265600 | -6.27768300 | -2.38398900 |
| H | -5.12992200 | -3.89309900 | -1.58130400 |
| H | -4.31563300 | -2.74754300 | -2.69500900 |
| H | -4.69297600 | -4.40515800 | -3.23207200 |
| H | -1.99902000 | -3.10464200 | -3.32343900 |
| H | -1.12537700 | -4.55970100 | -2.77072900 |
| H | -2.49175200 | -4.72725700 | -3.90606800 |
| H | -5.77872200 | 3.98754900  | -0.56755700 |
| H | -6.16568100 | 2.33013000  | -1.10622200 |
| H | -6.31101100 | 3.69010800  | -2.25370000 |

|   |             |            |             |
|---|-------------|------------|-------------|
| H | -3.88067100 | 5.17174300 | -1.50731600 |
| H | -2.77444100 | 4.33641300 | -2.64472400 |
| H | -4.43565100 | 4.74513300 | -3.14701400 |
| H | -4.64724300 | 1.18145100 | -2.68514200 |
| H | -3.19250800 | 2.03206600 | -3.27311600 |
| H | -4.82096100 | 2.55356400 | -3.81257800 |

[MnL(O<sub>2</sub>)(H<sub>2</sub>O)]<sup>2+</sup> (in methanol)

Charge=2 S=5/2

SCF energy: -3453.13645368 Ha

|    |             |             |             |
|----|-------------|-------------|-------------|
| O  | 1.74985400  | -0.86920700 | 2.65814000  |
| O  | 0.86154800  | 1.72192700  | 2.70685000  |
| O  | -0.84662200 | -1.76314300 | 2.64240600  |
| O  | -1.72009000 | 0.82511200  | 2.65570500  |
| O  | -0.10668500 | -0.51676500 | 4.96112600  |
| O  | 0.27828900  | 0.07877100  | 0.31754700  |
| Mn | 0.01044900  | -0.01356200 | 2.55986200  |
| C  | 2.40828100  | -1.16906300 | 1.55263600  |
| C  | 1.18529500  | 2.38290600  | 1.60795100  |
| C  | -1.15973000 | -2.39069100 | 1.51908400  |
| C  | -2.37273000 | 1.15763500  | 1.55454500  |
| H  | 0.77950000  | -0.70979000 | 5.29923100  |
| H  | -0.51125800 | -1.37484300 | 4.74736400  |
| O  | -0.53540500 | -0.14687400 | -0.70025200 |
| C  | 2.21939300  | -2.43157700 | 0.92800500  |
| C  | 3.31076600  | -0.22482300 | 0.98204300  |
| C  | 2.46734500  | 2.20587400  | 1.01794000  |
| C  | 0.24981000  | 3.27527200  | 1.00798800  |
| C  | -2.43663500 | -2.19937900 | 0.92678700  |
| C  | -0.22042200 | -3.26989600 | 0.90796800  |
| C  | -2.19096400 | 2.44430100  | 0.98058400  |
| C  | -3.27872800 | 0.23567300  | 0.95667500  |
| C  | 2.98065300  | -2.76108900 | -0.19672400 |
| C  | 1.19079700  | -3.42086600 | 1.47472400  |
| C  | 4.05558600  | -0.58946200 | -0.13620000 |
| C  | 3.44623400  | 1.17514700  | 1.57893400  |
| C  | 2.82357900  | 2.97181100  | -0.09428000 |
| C  | 0.63920900  | 4.01945700  | -0.10384000 |
| C  | -1.16547000 | 3.41409400  | 1.56645600  |
| C  | -2.79429000 | -2.95654900 | -0.19132100 |
| C  | -3.41834000 | -1.18262200 | 1.50693300  |
| C  | -0.60893800 | -4.00310000 | -0.21164000 |
| C  | -2.97104700 | 2.82228300  | -0.11577900 |
| C  | -4.04497400 | 0.64900800  | -0.12994700 |



|   |             |             |             |
|---|-------------|-------------|-------------|
| H | 2.83642700  | -3.73851300 | -0.63976200 |
| C | 3.89829800  | -1.85098100 | -0.72110700 |
| H | 1.54091900  | -4.43736500 | 1.26061100  |
| H | 1.14268600  | -3.30372800 | 2.56056900  |
| H | 4.75918600  | 0.13092900  | -0.54235300 |
| H | 4.46685000  | 1.53169100  | 1.39738100  |
| H | 3.29943600  | 1.10834300  | 2.66003900  |
| H | 3.81523000  | 2.83735400  | -0.50787600 |
| C | 1.91911500  | 3.87810000  | -0.64851600 |
| H | -0.07694600 | 4.71435400  | -0.53190500 |
| H | -1.51142500 | 4.43739400  | 1.37976300  |
| H | -1.12734100 | 3.26390100  | 2.64873000  |
| H | -3.78623200 | -2.81793000 | -0.60287800 |
| C | -1.89018000 | -3.85774800 | -0.75304700 |
| H | -4.43759500 | -1.53212800 | 1.30536600  |
| H | -3.28259600 | -1.14903100 | 2.59141700  |
| H | 0.10623600  | -4.69553500 | -0.64511600 |
| H | -2.83697400 | 3.81943300  | -0.51595200 |
| C | -3.89970000 | 1.93528000  | -0.66044200 |
| H | -4.75556000 | -0.05389900 | -0.55420000 |
| N | 4.75980300  | -2.19710500 | -1.91264800 |
| N | 2.29184000  | 4.74236300  | -1.82997500 |
| N | -2.26539900 | -4.71584300 | -1.93855000 |
| N | -4.78373000 | 2.33305200  | -1.81936500 |
| C | 6.22131000  | -2.15202500 | -1.51624600 |
| C | 4.47939400  | -3.57525300 | -2.45692800 |
| C | 4.51172500  | -1.20940400 | -3.03398300 |
| C | 2.20764500  | 6.20446900  | -1.44152700 |
| C | 3.69291100  | 4.48440300  | -2.32452900 |
| C | 1.34855700  | 4.47312100  | -2.98411400 |
| C | -2.18699000 | -6.17958400 | -1.55500500 |
| C | -3.66519400 | -4.45046500 | -2.43279300 |
| C | -1.32089600 | -4.44646100 | -3.09152200 |
| C | -6.23955400 | 2.24202700  | -1.40951200 |
| C | -4.53403600 | 3.74422500  | -2.28886100 |
| C | -4.53485900 | 1.41329100  | -2.99669500 |
| H | 6.37656800  | -2.86878600 | -0.71047500 |
| H | 6.46904100  | -1.14837600 | -1.17756400 |
| H | 6.82552200  | -2.41368200 | -2.38568700 |
| H | 4.68924900  | -4.31578700 | -1.68698600 |
| H | 3.43945500  | -3.63024600 | -2.77475900 |
| H | 5.13707400  | -3.73330900 | -3.31091800 |
| H | 3.45715200  | -1.25945000 | -3.30330900 |
| H | 4.76497600  | -0.20775000 | -2.69414700 |

|   |             |             |             |
|---|-------------|-------------|-------------|
| H | 5.13878800  | -1.48445500 | -3.88282100 |
| H | 2.89097100  | 6.37502600  | -0.61022200 |
| H | 1.18803700  | 6.43692500  | -1.14200100 |
| H | 2.49179600  | 6.80951500  | -2.30326300 |
| H | 4.40205900  | 4.70663900  | -1.52883900 |
| H | 3.77614500  | 3.44549300  | -2.63954100 |
| H | 3.87015200  | 5.14401900  | -3.17327300 |
| H | 0.33109300  | 4.70698200  | -2.67914300 |
| H | 1.42855200  | 3.41930300  | -3.24893900 |
| H | 1.64034300  | 5.10428500  | -3.82425300 |
| H | -2.87106300 | -6.35016000 | -0.72429300 |
| H | -1.16822300 | -6.41684100 | -1.25620600 |
| H | -2.47343500 | -6.78064900 | -2.41876100 |
| H | -4.37567600 | -4.67557200 | -1.63916300 |
| H | -3.74476400 | -3.40928300 | -2.74127200 |
| H | -3.84381200 | -5.10424700 | -3.28571900 |
| H | -1.39767800 | -3.39175900 | -3.35379600 |
| H | -0.30425000 | -4.68418000 | -2.78702500 |
| H | -1.61425200 | -5.07459500 | -3.93343400 |
| H | -6.39598100 | 2.90629700  | -0.56023100 |
| H | -6.46996500 | 1.21632600  | -1.13020900 |
| H | -6.85700900 | 2.54683700  | -2.25519100 |
| H | -4.73982200 | 4.43597700  | -1.47361500 |
| H | -3.50146600 | 3.83377700  | -2.62213400 |
| H | -5.20986600 | 3.94008000  | -3.12068800 |
| H | -4.76240600 | 0.38984200  | -2.70718200 |
| H | -3.48598800 | 1.49941500  | -3.27897800 |
| H | -5.18114400 | 1.72093000  | -3.81952200 |

[MnL(O<sub>2</sub>)(H<sub>2</sub>O)]<sup>2+</sup> (in chloroform)

Charge=2 S=5/2

SCF energy: -3453.08845379 Ha

|    |             |             |            |
|----|-------------|-------------|------------|
| O  | 1.60161800  | -1.12673500 | 2.63074400 |
| O  | 1.12593200  | 1.56621100  | 2.64687500 |
| O  | -1.10070700 | -1.59371500 | 2.61438100 |
| O  | -1.56445700 | 1.08832200  | 2.62646100 |
| O  | 0.02661800  | -0.29263300 | 4.92311500 |
| O  | 0.27777800  | 0.03949100  | 0.28427300 |
| Mn | 0.01135200  | -0.01092400 | 2.54667300 |
| C  | 2.19513100  | -1.53130900 | 1.52641900 |
| C  | 1.54741700  | 2.16591800  | 1.55281400 |
| C  | -1.51946000 | -2.17176700 | 1.50546400 |
| C  | -2.15988400 | 1.51772600  | 1.53189800 |
| H  | 0.88884200  | -0.68808700 | 5.12085000 |

|   |             |             |             |
|---|-------------|-------------|-------------|
| H | -0.63205600 | -0.98613900 | 5.07985000  |
| O | -0.57195900 | -0.08624200 | -0.72228700 |
| C | 1.80746600  | -2.75371500 | 0.91113200  |
| C | 3.23484400  | -0.74587500 | 0.94526700  |
| C | 2.78827000  | 1.79279800  | 0.96447800  |
| C | 0.76577100  | 3.20020200  | 0.95863400  |
| C | -2.75962200 | -1.79112900 | 0.92328000  |
| C | -0.73831200 | -3.19928300 | 0.90017600  |
| C | -1.77982400 | 2.75833900  | 0.95102700  |
| C | -3.20756500 | 0.75025900  | 0.94405300  |
| C | 2.51656000  | -3.21731300 | -0.19960200 |
| C | 0.63461400  | -3.56219600 | 1.46486500  |
| C | 3.92121100  | -1.24130600 | -0.15918000 |
| C | 3.58953200  | 0.62060500  | 1.52919700  |
| C | 3.27082700  | 2.50994100  | -0.13148200 |
| C | 1.27784300  | 3.89112300  | -0.13664000 |
| C | -0.60812400 | 3.55423400  | 1.52507900  |
| C | -3.25060100 | -2.50686800 | -0.17020100 |
| C | -3.56243900 | -0.62688400 | 1.50178300  |
| C | -1.25574200 | -3.88521300 | -0.19590800 |
| C | -2.50779300 | 3.25821900  | -0.13153800 |
| C | -3.91753300 | 1.28466800  | -0.12687100 |
| H | 2.22275500  | -4.16731700 | -0.62898300 |
| C | 3.57440100  | -2.47423100 | -0.72399400 |
| H | 0.82094500  | -4.62363700 | 1.26229300  |
| H | 0.60571800  | -3.42664100 | 2.54933900  |
| H | 4.73324800  | -0.64683500 | -0.56810800 |
| H | 4.65428300  | 0.80921300  | 1.34730700  |
| H | 3.43315100  | 0.58527900  | 2.61050700  |
| H | 4.23302000  | 2.22666900  | -0.54033900 |
| C | 2.52630300  | 3.55920400  | -0.67323600 |
| H | 0.68588900  | 4.69999300  | -0.55527400 |
| H | -0.79254500 | 4.61965500  | 1.34283200  |
| H | -0.58389600 | 3.39686900  | 2.60686000  |
| H | -4.21589200 | -2.22286100 | -0.57107800 |
| C | -2.50917100 | -3.55287900 | -0.72084000 |
| H | -4.62621700 | -0.81282100 | 1.31176900  |
| H | -3.41232500 | -0.60844900 | 2.58477100  |
| H | -0.66683200 | -4.69291200 | -0.62098600 |
| H | -2.22272800 | 4.22275300  | -0.53343900 |
| C | -3.57784100 | 2.53400500  | -0.65791800 |
| H | -4.74192700 | 0.70768300  | -0.53591500 |
| N | 4.39204000  | -2.98026900 | -1.89039300 |
| N | 3.04989500  | 4.38462700  | -1.82647700 |

|   |             |             |             |
|---|-------------|-------------|-------------|
| N | -3.03949200 | -4.37239500 | -1.87543100 |
| N | -4.41767200 | 3.08020500  | -1.79028700 |
| C | 5.83757600  | -3.14711000 | -1.46917300 |
| C | 3.91594800  | -4.31548400 | -2.40244200 |
| C | 4.31242500  | -1.99929400 | -3.04061000 |
| C | 3.19191400  | 5.83100300  | -1.39877700 |
| C | 4.40113600  | 3.92332600  | -2.30898800 |
| C | 2.09660800  | 4.29707100  | -2.99914700 |
| C | -3.16609900 | -5.82348600 | -1.45940700 |
| C | -4.39926300 | -3.91681300 | -2.33919000 |
| C | -2.09981800 | -4.26699400 | -3.05754600 |
| C | -5.85353400 | 3.23699800  | -1.33370600 |
| C | -3.94731800 | 4.42982200  | -2.26844300 |
| C | -4.36476900 | 2.13757200  | -2.97359100 |
| H | 5.87058000  | -3.85784600 | -0.64390400 |
| H | 6.22993700  | -2.18516000 | -1.14707100 |
| H | 6.40830400  | -3.51951400 | -2.32111000 |
| H | 3.99622100  | -5.05431000 | -1.60662000 |
| H | 2.88508700  | -4.22300500 | -2.74073700 |
| H | 4.55671700  | -4.59903600 | -3.23709300 |
| H | 3.26577900  | -1.89490900 | -3.32530400 |
| H | 4.70898200  | -1.03838400 | -2.72038400 |
| H | 4.90202400  | -2.38787300 | -3.87226700 |
| H | 3.88194500  | 5.86949400  | -0.55633300 |
| H | 2.21837100  | 6.21275900  | -1.09942000 |
| H | 3.57921800  | 6.40727000  | -2.24033100 |
| H | 5.12111000  | 4.00935900  | -1.49670100 |
| H | 4.32666600  | 2.89228000  | -2.65111400 |
| H | 4.69697000  | 4.56869700  | -3.13579000 |
| H | 1.12425200  | 4.68277300  | -2.70109500 |
| H | 2.00987100  | 3.25000700  | -3.28819900 |
| H | 2.49820000  | 4.89252100  | -3.82038200 |
| H | -3.84747600 | -5.87501900 | -0.61063300 |
| H | -2.18673500 | -6.20050100 | -1.17326300 |
| H | -3.55730900 | -6.39524400 | -2.30222200 |
| H | -5.10977100 | -4.01565400 | -1.52005300 |
| H | -4.33596600 | -2.88215600 | -2.67252000 |
| H | -4.69906300 | -4.55691000 | -3.16865800 |
| H | -2.02341200 | -3.21659500 | -3.33734500 |
| H | -1.12165900 | -4.64888200 | -2.77389600 |
| H | -2.50654200 | -4.85727200 | -3.87999600 |
| H | -5.86714200 | 3.92122600  | -0.48573400 |
| H | -6.24150200 | 2.26595600  | -1.03420900 |
| H | -6.44083500 | 3.63776800  | -2.16122300 |

|   |             |            |             |
|---|-------------|------------|-------------|
| H | -4.00785900 | 5.14272100 | -1.44760500 |
| H | -2.92415600 | 4.34472000 | -2.63115000 |
| H | -4.60448000 | 4.74286400 | -3.07947500 |
| H | -4.75871000 | 1.16768600 | -2.67832800 |
| H | -3.32428500 | 2.03916200 | -3.28209100 |
| H | -4.96902700 | 2.55564600 | -3.78001800 |

[MnL(O<sub>2</sub>)(H<sub>2</sub>O)]<sup>2+</sup> (in benzene)

Charge=2 S=5/2

SCF energy: -3453.03186319 Ha

|    |             |             |             |
|----|-------------|-------------|-------------|
| O  | 1.74312000  | -0.88279400 | 2.59294600  |
| O  | 0.89154000  | 1.70811200  | 2.60323300  |
| O  | -0.86009700 | -1.73221500 | 2.58672500  |
| O  | -1.70156400 | 0.85444800  | 2.59093000  |
| O  | 0.06827200  | -0.26516700 | 4.87289800  |
| O  | 0.26343800  | 0.05730800  | 0.26148200  |
| Mn | 0.01122000  | -0.00575600 | 2.52132100  |
| C  | 2.38848400  | -1.20309400 | 1.49611800  |
| C  | 1.22027800  | 2.36243900  | 1.51528900  |
| C  | -1.19359300 | -2.36624900 | 1.48519600  |
| C  | -2.35470200 | 1.19553000  | 1.50447600  |
| H  | 0.97346900  | -0.53097800 | 5.09260600  |
| H  | -0.49747100 | -1.02886900 | 5.06078600  |
| O  | -0.58484600 | -0.17199600 | -0.72784700 |
| C  | 2.18593000  | -2.47546100 | 0.89008900  |
| C  | 3.30968700  | -0.28039800 | 0.91311700  |
| C  | 2.50430400  | 2.17581500  | 0.92722800  |
| C  | 0.29954300  | 3.28177200  | 0.92804400  |
| C  | -2.47765500 | -2.16861000 | 0.90369400  |
| C  | -0.27564600 | -3.27754100 | 0.88293700  |
| C  | -2.16139100 | 2.48116300  | 0.92651700  |
| C  | -3.28669700 | 0.28678200  | 0.92049100  |
| C  | 2.97529000  | -2.84801600 | -0.19956000 |
| C  | 1.13641300  | -3.43757700 | 1.44561500  |
| C  | 4.07957900  | -0.68843200 | -0.17068600 |
| C  | 3.46230200  | 1.12642500  | 1.48963900  |
| C  | 2.88780700  | 2.97733800  | -0.14826500 |
| C  | 0.71673000  | 4.06007900  | -0.14752300 |
| C  | -1.11022100 | 3.43194000  | 1.49807200  |
| C  | -2.86801600 | -2.96146100 | -0.17595800 |
| C  | -3.43611500 | -1.12707500 | 1.47915800  |
| C  | -0.69797500 | -4.04493300 | -0.19877900 |
| C  | -2.97130600 | 2.87930200  | -0.13915600 |
| C  | -4.08119500 | 0.72140500  | -0.13456600 |

|   |             |             |             |
|---|-------------|-------------|-------------|
| H | 2.83046200  | -3.83794400 | -0.61563700 |
| C | 3.92695000  | -1.96840500 | -0.71734200 |
| H | 1.47087700  | -4.46354800 | 1.24868900  |
| H | 1.08902900  | -3.30304400 | 2.52980200  |
| H | 4.80666200  | 0.01049300  | -0.57537200 |
| H | 4.48999100  | 1.46403200  | 1.30806400  |
| H | 3.31286700  | 1.07227800  | 2.57155600  |
| H | 3.88527400  | 2.84459700  | -0.55013500 |
| C | 2.00572400  | 3.92364000  | -0.67451400 |
| H | 0.01913700  | 4.78675800  | -0.55516300 |
| H | -1.44483500 | 4.46172600  | 1.32307400  |
| H | -1.05937300 | 3.27423600  | 2.57924800  |
| H | -3.86673200 | -2.82245300 | -0.57221500 |
| C | -1.98993000 | -3.90221500 | -0.71630800 |
| H | -4.46325700 | -1.46406300 | 1.29353900  |
| H | -3.28796400 | -1.08431600 | 2.56199800  |
| H | -0.00320400 | -4.76821300 | -0.61704000 |
| H | -2.83597500 | 3.87944200  | -0.53328600 |
| C | -3.93568700 | 2.01259100  | -0.65520100 |
| H | -4.81987200 | 0.03420000  | -0.53803900 |
| N | 4.84221100  | -2.37258000 | -1.85199100 |
| N | 2.41919400  | 4.85210700  | -1.79525900 |
| N | -2.40948200 | -4.81558500 | -1.84728100 |
| N | -4.87295300 | 2.44326000  | -1.76226600 |
| C | 6.28531000  | -2.30959800 | -1.39561000 |
| C | 4.58538600  | -3.77542000 | -2.33723400 |
| C | 4.64647200  | -1.44277300 | -3.02917200 |
| C | 2.33877300  | 6.29050200  | -1.32680400 |
| C | 3.83080900  | 4.61005100  | -2.26212400 |
| C | 1.50816300  | 4.66013300  | -2.98754300 |
| C | -2.33009200 | -6.25980800 | -1.39767300 |
| C | -3.82229900 | -4.56461800 | -2.30617300 |
| C | -1.50248900 | -4.60935800 | -3.04026800 |
| C | -6.30635200 | 2.37411900  | -1.27764500 |
| C | -4.62200700 | 3.85535100  | -2.22290800 |
| C | -4.70334200 | 1.53769700  | -2.96220200 |
| H | 6.40411000  | -2.98777700 | -0.55097000 |
| H | 6.51846800  | -1.29264600 | -1.08794800 |
| H | 6.92930100  | -2.60891100 | -2.22439200 |
| H | 4.74938600  | -4.47378200 | -1.51787400 |
| H | 3.56186900  | -3.84523300 | -2.70264100 |
| H | 5.28471200  | -3.98280100 | -3.14730900 |
| H | 3.60371100  | -1.50413500 | -3.34019100 |
| H | 4.88210900  | -0.42570200 | -2.72345100 |

|   |             |             |             |
|---|-------------|-------------|-------------|
| H | 5.31069800  | -1.75372300 | -3.83750300 |
| H | 3.00272800  | 6.40606900  | -0.47050800 |
| H | 1.31544600  | 6.51351200  | -1.03307500 |
| H | 2.64643600  | 6.94424300  | -2.14485900 |
| H | 4.51618600  | 4.77389700  | -1.43184100 |
| H | 3.91404700  | 3.58968300  | -2.63349500 |
| H | 4.04407600  | 5.31673600  | -3.06425800 |
| H | 0.48465200  | 4.88349100  | -2.69443900 |
| H | 1.58312200  | 3.62117100  | -3.30811800 |
| H | 1.82485800  | 5.33519400  | -3.78459900 |
| H | -2.99183100 | -6.38534900 | -0.54103700 |
| H | -1.30623500 | -6.48833000 | -1.10998100 |
| H | -2.64139300 | -6.90249100 | -2.22304600 |
| H | -4.50517000 | -4.73767300 | -1.47570100 |
| H | -3.90444900 | -3.53939900 | -2.66413300 |
| H | -4.03963200 | -5.26069700 | -3.11646500 |
| H | -1.57460700 | -3.56533100 | -3.34464400 |
| H | -0.47874500 | -4.84123700 | -2.75471300 |
| H | -1.82525300 | -5.27136900 | -3.84577000 |
| H | -6.40586000 | 3.03501500  | -0.41694800 |
| H | -6.53586400 | 1.35158900  | -0.98621700 |
| H | -6.96648700 | 2.69202400  | -2.08657500 |
| H | -4.76864400 | 4.53691100  | -1.38628400 |
| H | -3.60548300 | 3.93046700  | -2.60628500 |
| H | -5.33626100 | 4.08121700  | -3.01484000 |
| H | -4.93645800 | 0.51520400  | -2.67319500 |
| H | -3.66636500 | 1.60174000  | -3.29147100 |
| H | -5.38180400 | 1.86781400  | -3.75091200 |

[MnL(O<sub>2</sub>)(H<sub>2</sub>O)]<sup>2+</sup>-8H<sub>2</sub>O (in water)

Charge=2 S=5/2

SCF energy: -4064.84015966 Ha

|    |             |             |             |
|----|-------------|-------------|-------------|
| O  | 1.83648500  | -0.10060000 | -3.23716600 |
| O  | -0.07076200 | -2.04149900 | -3.15648200 |
| O  | -1.99187700 | -0.12041500 | -3.13672100 |
| O  | -0.05305200 | -0.05008200 | -5.49316600 |
| O  | 0.17422600  | -0.19240600 | -0.78285200 |
| Mn | -0.08515400 | -0.11253300 | -3.16926200 |
| C  | 2.63773700  | -0.08833900 | -2.18950100 |
| C  | -0.02845200 | -2.70865600 | -2.01514400 |
| C  | -0.07716600 | 2.52601200  | -2.10182000 |
| C  | -2.73956600 | -0.09484000 | -2.04922400 |
| H  | -0.31690300 | 0.82147700  | -5.82430600 |
| H  | 0.84539200  | -0.20479200 | -5.82208100 |

|   |             |             |             |
|---|-------------|-------------|-------------|
| O | -0.22279800 | 0.04682700  | 0.45454600  |
| C | 3.07122300  | 1.15131900  | -1.63583600 |
| C | 3.10581900  | -1.31264300 | -1.63754000 |
| C | 1.22928000  | -3.08452800 | -1.45865900 |
| C | -1.23390300 | -3.07386400 | -1.35556900 |
| C | -1.30591500 | 2.93491100  | -1.50467000 |
| C | 1.16158500  | 2.93133900  | -1.52951200 |
| C | -3.15499200 | -1.31575200 | -1.44314900 |
| C | -3.19122600 | 1.14696900  | -1.52519100 |
| C | 4.09087500  | 1.14110700  | -0.68364200 |
| C | 2.48889200  | 2.47237600  | -2.14160000 |
| C | 4.13366400  | -1.28349000 | -0.68896000 |
| C | 2.53575800  | -2.64452600 | -2.12192700 |
| C | 1.25233000  | -3.89165300 | -0.32377500 |
| C | -1.16984500 | -3.88134500 | -0.21415100 |
| C | -2.59089300 | -2.65247300 | -1.92401800 |
| C | -1.27172300 | 3.83605500  | -0.44155800 |
| C | -2.64467900 | 2.46321300  | -2.07775000 |
| C | 1.15267100  | 3.83840500  | -0.46246700 |
| C | -4.15906100 | -1.27514500 | -0.47666700 |
| C | -4.21220400 | 1.14634900  | -0.56745000 |
| H | 4.45853900  | 2.09379400  | -0.31564200 |
| C | 4.64655300  | -0.06355000 | -0.23740600 |
| H | 3.23145300  | 3.25901300  | -1.96852500 |
| H | 2.34193300  | 2.38368900  | -3.22231200 |
| H | 4.53306900  | -2.22882200 | -0.34275800 |
| H | 3.28669400  | -3.42412500 | -1.95221900 |
| H | 2.36196900  | -2.57309800 | -3.19927800 |
| H | 2.21685900  | -4.20833200 | 0.06047500  |
| C | 0.06294100  | -4.29865400 | 0.29154900  |
| H | -2.10254900 | -4.19191700 | 0.24033200  |
| H | -3.31887800 | -3.43497200 | -1.68295900 |
| H | -2.49746600 | -2.60796700 | -3.01323000 |
| H | -2.21646100 | 4.19045900  | -0.04166800 |
| C | -0.05486100 | 4.29953700  | 0.06986900  |
| H | -3.38840400 | 3.24685600  | -1.89661900 |
| H | -2.52714000 | 2.35657500  | -3.16039100 |
| H | 2.10701200  | 4.20372200  | -0.10142800 |
| H | -4.52077800 | -2.21604400 | -0.07409000 |
| C | -4.71927900 | -0.05751500 | -0.07360600 |
| H | -4.61320900 | 2.10213400  | -0.25196800 |
| N | 5.84412200  | -0.00507200 | 0.68214000  |
| N | 0.15374700  | -5.25817500 | 1.45522400  |
| N | -0.09038500 | 5.38228200  | 1.12464000  |



|   |             |             |             |
|---|-------------|-------------|-------------|
| N | -5.92439500 | -0.09436800 | 0.83798500  |
| C | 5.49221300  | 0.70438000  | 1.97304700  |
| C | 6.36889400  | -1.37174000 | 1.04746200  |
| C | 6.96956800  | 0.74068000  | -0.00893100 |
| C | -1.19000700 | -5.56392900 | 2.06994600  |
| C | 0.74542900  | -6.57024800 | 0.97662300  |
| C | 1.03231000  | -4.68564300 | 2.54872000  |
| C | 1.27540200  | 5.71545600  | 1.67245400  |
| C | -0.65765600 | 6.65006400  | 0.51384300  |
| C | -0.95816300 | 4.96557400  | 2.29523200  |
| C | -6.46733100 | 1.27778400  | 1.15322600  |
| C | -7.03801500 | -0.86990200 | 0.15939000  |
| C | -5.58171600 | -0.76329700 | 2.15236000  |
| H | 4.73573600  | 0.11604400  | 2.49055000  |
| H | 5.10001100  | 1.69329900  | 1.74987200  |
| H | 6.39524000  | 0.78092100  | 2.57968700  |
| H | 5.59196700  | -1.93014500 | 1.56707700  |
| H | 6.68146500  | -1.89090600 | 0.14303900  |
| H | 7.22355200  | -1.22902300 | 1.70767800  |
| H | 7.19163900  | 0.22913100  | -0.94487600 |
| H | 6.65475400  | 1.76329100  | -0.20494100 |
| H | 7.84060700  | 0.73673300  | 0.64711600  |
| H | -1.82437000 | -6.04607000 | 1.32850200  |
| H | -1.64337600 | -4.64079700 | 2.42790900  |
| H | -1.02249200 | -6.24151100 | 2.90604300  |
| H | 0.09986100  | -6.96799200 | 0.19426400  |
| H | 1.74311000  | -6.38747500 | 0.58276000  |
| H | 0.79439400  | -7.25792400 | 1.82174100  |
| H | 0.60401300  | -3.73905100 | 2.87517600  |
| H | 2.03646400  | -4.52928000 | 2.16195300  |
| H | 1.06087600  | -5.39837100 | 3.37341300  |
| H | 1.90529100  | 6.09425500  | 0.87001800  |
| H | 1.71179900  | 4.82570500  | 2.12345300  |
| H | 1.14755800  | 6.48703700  | 2.43041600  |
| H | -0.01579400 | 6.94384800  | -0.31617200 |
| H | -1.66563200 | 6.45055400  | 0.15566700  |
| H | -0.67564800 | 7.42625600  | 1.27997600  |
| H | -1.98000100 | 4.81694400  | 1.95488200  |
| H | -0.56214800 | 4.03932000  | 2.70906300  |
| H | -0.93198300 | 5.76172000  | 3.03951700  |
| H | -6.76397400 | 1.76885400  | 0.22800600  |
| H | -5.70968500 | 1.85976200  | 1.67449400  |
| H | -7.33584700 | 1.14663900  | 1.79756200  |
| H | -7.26018500 | -0.38448800 | -0.79034700 |

|   |             |             |             |
|---|-------------|-------------|-------------|
| H | -6.71112600 | -1.89329100 | -0.00971200 |
| H | -7.91246600 | -0.85984300 | 0.81073500  |
| H | -4.81780300 | -0.16929700 | 2.65077500  |
| H | -5.20686700 | -1.76565100 | 1.96014400  |
| H | -6.48571700 | -0.80928100 | 2.76057600  |
| O | 1.87954900  | -0.68853700 | 1.84605500  |
| H | 2.47910600  | -1.11202100 | 1.21390600  |
| H | 1.02351800  | -0.49722100 | 1.34623500  |
| O | -2.11119300 | -1.57764600 | 2.55402800  |
| H | -1.60140600 | -1.88739000 | 1.79063200  |
| H | -2.23202000 | -0.61456900 | 2.40579400  |
| O | -1.96368100 | 1.18561600  | 2.08671900  |
| H | -2.68204800 | 1.75986400  | 1.79284600  |
| H | -1.40157700 | 0.97972900  | 1.29417800  |
| O | 2.34927800  | 1.98275700  | 2.29786700  |
| H | 1.89189200  | 2.41521700  | 1.56263700  |
| H | 2.28878200  | 1.01497600  | 2.11284200  |
| O | -0.09201300 | 1.81458100  | -3.21499800 |
| O | -1.22892400 | 1.35532500  | 4.80704600  |
| H | -1.21518300 | 0.39128100  | 5.02046800  |
| H | -1.46650500 | 1.40866000  | 3.85806600  |
| O | 1.76208400  | -0.97057500 | 4.62617800  |
| H | 1.85209600  | -1.01789500 | 3.65016600  |
| H | 1.77400300  | -0.00742800 | 4.84157500  |
| O | 1.49222000  | 1.79503400  | 4.92812300  |
| H | 0.50516100  | 1.76189500  | 4.91915800  |
| H | 1.77198600  | 2.04240500  | 4.01946100  |
| O | -0.93208200 | -1.40085700 | 5.06958900  |
| H | 0.04748700  | -1.37406300 | 4.94558800  |
| H | -1.32103900 | -1.62930700 | 4.19659700  |

[MnL(O<sub>2</sub>)(H<sub>2</sub>O)]<sup>2+</sup>-8H<sub>2</sub>O (in methanol)

Charge=2 S=5/2

SCF energy: -4064.83522846 Ha

|    |             |             |             |
|----|-------------|-------------|-------------|
| O  | 1.85101100  | -0.11107000 | -3.21937900 |
| O  | -0.08451000 | -2.01854700 | -3.16100800 |
| O  | -1.97710700 | -0.06724000 | -3.14855800 |
| O  | -0.01155500 | -0.03507400 | -5.49092500 |
| O  | 0.17319100  | -0.18494600 | -0.78277100 |
| Mn | -0.07044400 | -0.08982600 | -3.17076100 |
| C  | 2.64791400  | -0.11121200 | -2.16926100 |
| C  | -0.06126000 | -2.69062100 | -2.02248900 |
| C  | -0.02600000 | 2.54163500  | -2.09506400 |
| C  | -2.73095000 | -0.03671900 | -2.06596900 |

|   |             |             |             |
|---|-------------|-------------|-------------|
| H | -0.19205400 | 0.85419200  | -5.83119300 |
| H | 0.87097200  | -0.27509000 | -5.81134300 |
| O | -0.21644700 | 0.05763300  | 0.45653500  |
| C | 3.10204200  | 1.12196400  | -1.61813200 |
| C | 3.09405300  | -1.34245500 | -1.61411300 |
| C | 1.18582800  | -3.08711900 | -1.45566000 |
| C | -1.27798700 | -3.04236500 | -1.37619400 |
| C | -1.25075900 | 2.96432800  | -1.49873000 |
| C | 1.21639900  | 2.92405100  | -1.51462400 |
| C | -3.16923500 | -1.25457000 | -1.46981600 |
| C | -3.16622700 | 1.20891300  | -1.53686600 |
| C | 4.12343600  | 1.09674500  | -0.66842200 |
| C | 2.53929300  | 2.45066400  | -2.12509800 |
| C | 4.12088000  | -1.32855400 | -0.66375300 |
| C | 2.50569500  | -2.66467100 | -2.10382900 |
| C | 1.18586500  | -3.90269900 | -0.32656300 |
| C | -1.23678900 | -3.85860900 | -0.24001800 |
| C | -2.62274100 | -2.59691000 | -1.95482200 |
| C | -1.20668700 | 3.85410300  | -0.42643700 |
| C | -2.59529000 | 2.51875800  | -2.07970000 |
| C | 1.21726900  | 3.81926700  | -0.43775700 |
| C | -4.17741300 | -1.20403800 | -0.50826400 |
| C | -4.19232000 | 1.21858200  | -0.58457100 |
| H | 4.51257700  | 2.04412600  | -0.30909100 |
| C | 4.65499000  | -0.11621000 | -0.21566000 |
| H | 3.29121400  | 3.22773800  | -1.94883500 |
| H | 2.39376500  | 2.36527100  | -3.20618900 |
| H | 4.50366200  | -2.27967900 | -0.31411600 |
| H | 3.24262200  | -3.45634200 | -1.92863700 |
| H | 2.34388700  | -2.58880300 | -3.18284600 |
| H | 2.14203700  | -4.23625100 | 0.06433600  |
| C | -0.01503900 | -4.29739600 | 0.27428300  |
| H | -2.17819700 | -4.15925500 | 0.20316700  |
| H | -3.36517100 | -3.36926600 | -1.72529900 |
| H | -2.51830400 | -2.54709700 | -3.04277500 |
| H | -2.14736000 | 4.21966100  | -0.02690100 |
| C | 0.01499800  | 4.29277000  | 0.09531100  |
| H | -3.32610100 | 3.31414800  | -1.89693600 |
| H | -2.47550000 | 2.41616700  | -3.16247100 |
| H | 2.17584000  | 4.16487700  | -0.06867000 |
| H | -4.55536700 | -2.14163700 | -0.11306000 |
| C | -4.72041100 | 0.01970500  | -0.10028100 |
| H | -4.58069800 | 2.17857600  | -0.26570900 |
| N | 5.86569300  | -0.07568900 | 0.68802200  |

|   |             |             |             |
|---|-------------|-------------|-------------|
| N | 0.05033600  | -5.26914900 | 1.42950700  |
| N | -0.00807700 | 5.36291100  | 1.16337800  |
| N | -5.92994400 | -0.00444600 | 0.80611700  |
| C | 5.57632100  | 0.72444900  | 1.94080300  |
| C | 6.31875600  | -1.44749900 | 1.12499300  |
| C | 7.01773400  | 0.56660900  | -0.06124000 |
| C | -1.30299900 | -5.55582000 | 2.03218800  |
| C | 0.62178100  | -6.58729700 | 0.94322300  |
| C | 0.93080300  | -4.72292800 | 2.53474300  |
| C | 1.35995900  | 5.66438300  | 1.72391900  |
| C | -0.54939400 | 6.64798600  | 0.56557600  |
| C | -0.89010200 | 4.94595300  | 2.32317500  |
| C | -6.45207500 | 1.37386800  | 1.12917600  |
| C | -7.05336700 | -0.75692100 | 0.11755300  |
| C | -5.60359100 | -0.68850200 | 2.11696800  |
| H | 4.78595400  | 0.22034100  | 2.49444700  |
| H | 5.25354000  | 1.72561800  | 1.66772600  |
| H | 6.48892200  | 0.77263000  | 2.53573300  |
| H | 5.51356800  | -1.93749900 | 1.67049100  |
| H | 6.60480900  | -2.02842800 | 0.24990200  |
| H | 7.18055800  | -1.31660200 | 1.77856700  |
| H | 7.19447200  | -0.00827100 | -0.96980300 |
| H | 6.75203500  | 1.59169500  | -0.31152500 |
| H | 7.90015500  | 0.55248000  | 0.57936900  |
| H | -1.94138000 | -6.01803000 | 1.28160800  |
| H | -1.74080800 | -4.62771300 | 2.39674400  |
| H | -1.15415500 | -6.24516300 | 2.86222400  |
| H | -0.02635000 | -6.96806600 | 0.15454900  |
| H | 1.62436500  | -6.41861100 | 0.55554700  |
| H | 0.65459500  | -7.28231600 | 1.78312800  |
| H | 0.51765100  | -3.77137600 | 2.86632700  |
| H | 1.94078100  | -4.58233100 | 2.15719400  |
| H | 0.93943900  | -5.44311900 | 3.35336100  |
| H | 2.00302600  | 6.03713800  | 0.92917200  |
| H | 1.77511200  | 4.76221400  | 2.17043200  |
| H | 1.24231200  | 6.43203900  | 2.48754500  |
| H | 0.10541100  | 6.94414800  | -0.25345000 |
| H | -1.55630700 | 6.46864300  | 0.19388100  |
| H | -0.56387000 | 7.41314600  | 1.34285700  |
| H | -1.91306400 | 4.82365500  | 1.97564200  |
| H | -0.51451300 | 4.00550900  | 2.72390100  |
| H | -0.85189100 | 5.72946600  | 3.08027000  |
| H | -6.73511600 | 1.87692000  | 0.20612400  |
| H | -5.68812700 | 1.93905900  | 1.65976500  |

|   |             |             |             |
|---|-------------|-------------|-------------|
| H | -7.32653400 | 1.25237100  | 1.76740400  |
| H | -7.26584700 | -0.25962200 | -0.82825700 |
| H | -6.74160900 | -1.78357900 | -0.06015800 |
| H | -7.92943200 | -0.73936000 | 0.76662000  |
| H | -4.83127400 | -0.11178600 | 2.62282500  |
| H | -5.24453800 | -1.69551800 | 1.91921500  |
| H | -6.51057000 | -0.72383300 | 2.72149400  |
| O | 1.85185600  | -0.74409800 | 1.86120400  |
| H | 2.45301200  | -1.17058900 | 1.23267400  |
| H | 1.00747700  | -0.52811200 | 1.35140400  |
| O | -2.16776900 | -1.56825400 | 2.52747700  |
| H | -1.66553300 | -1.88812700 | 1.76335000  |
| H | -2.26340400 | -0.60149900 | 2.38458800  |
| O | -1.96014900 | 1.19559200  | 2.08247600  |
| H | -2.66986200 | 1.77738900  | 1.78262100  |
| H | -1.38967400 | 0.98951300  | 1.29539000  |
| O | 2.36271000  | 1.91324300  | 2.33672400  |
| H | 1.93133600  | 2.35674900  | 1.59252800  |
| H | 2.28808500  | 0.94743800  | 2.14572100  |
| O | -0.04702400 | 1.83788400  | -3.21314600 |
| O | -1.24449500 | 1.33310300  | 4.80969100  |
| H | -1.25227300 | 0.36754400  | 5.01635500  |
| H | -1.47092300 | 1.39753100  | 3.85873400  |
| O | 1.70168800  | -1.04909100 | 4.63777200  |
| H | 1.80134400  | -1.08547200 | 3.66236400  |
| H | 1.73153300  | -0.08947700 | 4.86630000  |
| O | 1.48311600  | 1.71947900  | 4.96263500  |
| H | 0.49568200  | 1.70445700  | 4.94506700  |
| H | 1.77447200  | 1.97027600  | 4.05915600  |
| O | -1.00493600 | -1.43061200 | 5.05301300  |
| H | -0.02382900 | -1.42239400 | 4.93954000  |
| H | -1.38847900 | -1.64588800 | 4.17437500  |

[MnL(O<sub>2</sub>)(H<sub>2</sub>O)]<sup>2+</sup>-8H<sub>2</sub>O (in chloroform)

Charge=2 S=5/2

SCF energy: -4064.78694571 Ha

|    |             |             |             |
|----|-------------|-------------|-------------|
| O  | 1.85626000  | -0.10006200 | -3.20947000 |
| O  | -0.06921700 | -2.01644500 | -3.14635000 |
| O  | -1.96844500 | -0.07488000 | -3.11966100 |
| O  | -0.04039900 | -0.01473600 | -5.45918100 |
| O  | 0.18948600  | -0.18164000 | -0.76973600 |
| Mn | -0.06360500 | -0.09209900 | -3.17101600 |
| C  | 2.65472300  | -0.09838300 | -2.16407200 |
| C  | -0.03906200 | -2.68574200 | -2.00925000 |

|   |             |             |             |
|---|-------------|-------------|-------------|
| C | -0.03980200 | 2.53837600  | -2.08754400 |
| C | -2.72593000 | -0.04826200 | -2.04502300 |
| H | -0.16577300 | 0.89060700  | -5.78154100 |
| H | 0.78948000  | -0.33355200 | -5.84367300 |
| O | -0.16937000 | 0.04280200  | 0.48205200  |
| C | 3.10072300  | 1.13695200  | -1.60979000 |
| C | 3.11226300  | -1.32854000 | -1.61404500 |
| C | 1.21178300  | -3.07814400 | -1.44628600 |
| C | -1.25273400 | -3.04138100 | -1.35794200 |
| C | -1.26670000 | 2.95534100  | -1.48906700 |
| C | 1.20133900  | 2.92560700  | -1.50551700 |
| C | -3.15928900 | -1.26895300 | -1.44981900 |
| C | -3.17664800 | 1.19598100  | -1.52247800 |
| C | 4.12113500  | 1.11674500  | -0.65951200 |
| C | 2.52630500  | 2.46033000  | -2.11777400 |
| C | 4.14285500  | -1.30922600 | -0.66791900 |
| C | 2.52612100  | -2.65164700 | -2.10365800 |
| C | 1.21858300  | -3.89008200 | -0.31468100 |
| C | -1.20432500 | -3.85477100 | -0.22047700 |
| C | -2.60005500 | -2.60482400 | -1.93757000 |
| C | -1.22592200 | 3.83973600  | -0.41209600 |
| C | -2.60908200 | 2.50467200  | -2.07156600 |
| C | 1.19785400  | 3.81601600  | -0.42523700 |
| C | -4.17452900 | -1.22413100 | -0.49613600 |
| C | -4.21133100 | 1.19961000  | -0.57888200 |
| H | 4.49670400  | 2.06559300  | -0.28947800 |
| C | 4.66596100  | -0.09332600 | -0.21407500 |
| H | 3.27285600  | 3.24400600  | -1.94731600 |
| H | 2.37764400  | 2.36921900  | -3.19792500 |
| H | 4.53654100  | -2.25869900 | -0.32530000 |
| H | 3.26670400  | -3.44214400 | -1.93769600 |
| H | 2.35449600  | -2.57240400 | -3.18083700 |
| H | 2.17738500  | -4.22048200 | 0.07311400  |
| C | 0.02105200  | -4.28597700 | 0.29292300  |
| H | -2.14346500 | -4.15916900 | 0.22507200  |
| H | -3.33674600 | -3.38495200 | -1.71540100 |
| H | -2.49152600 | -2.54725600 | -3.02478100 |
| H | -2.16831100 | 4.20001900  | -0.01114000 |
| C | -0.00625800 | 4.27972600  | 0.11345700  |
| H | -3.34260200 | 3.30007100  | -1.89841500 |
| H | -2.48448700 | 2.39305900  | -3.15285900 |
| H | 2.15477500  | 4.16246900  | -0.05285300 |
| H | -4.54846400 | -2.16402700 | -0.10231000 |
| C | -4.72977100 | -0.00420800 | -0.09226700 |

|   |             |             |             |
|---|-------------|-------------|-------------|
| H | -4.61606800 | 2.15743400  | -0.27220400 |
| N | 5.86009100  | -0.04356500 | 0.71172600  |
| N | 0.09214900  | -5.25262400 | 1.45322600  |
| N | -0.03038700 | 5.33809200  | 1.19364600  |
| N | -5.94395700 | -0.04006500 | 0.80855700  |
| C | 5.50774100  | 0.67402300  | 1.99906900  |
| C | 6.36929000  | -1.41349300 | 1.08540800  |
| C | 6.99705100  | 0.68696100  | 0.02303800  |
| C | -1.25874900 | -5.53312400 | 2.06470700  |
| C | 0.65958800  | -6.57354500 | 0.97035600  |
| C | 0.97773400  | -4.70249800 | 2.55273700  |
| C | 1.33868700  | 5.63185000  | 1.75718800  |
| C | -0.57390000 | 6.62866100  | 0.61037500  |
| C | -0.90867700 | 4.90713300  | 2.35138700  |
| C | -6.46382000 | 1.33404500  | 1.15069000  |
| C | -7.06518200 | -0.77948000 | 0.10211200  |
| C | -5.62561400 | -0.74571200 | 2.11076900  |
| H | 4.74470500  | 0.09349600  | 2.51629400  |
| H | 5.12253100  | 1.66465500  | 1.77056100  |
| H | 6.40862600  | 0.74804100  | 2.60956700  |
| H | 5.58447500  | -1.96129500 | 1.60483200  |
| H | 6.67975500  | -1.94053100 | 0.18460700  |
| H | 7.22309200  | -1.27798300 | 1.74865400  |
| H | 7.21950700  | 0.16745400  | -0.90866900 |
| H | 6.69291000  | 1.71089100  | -0.18302400 |
| H | 7.86501800  | 0.67979700  | 0.68359800  |
| H | -1.89983600 | -6.00442700 | 1.32185900  |
| H | -1.69491400 | -4.60026200 | 2.41953300  |
| H | -1.10701800 | -6.21292600 | 2.90236500  |
| H | 0.00975400  | -6.95557500 | 0.18356200  |
| H | 1.66145300  | -6.40795100 | 0.57902200  |
| H | 0.69363800  | -7.26684100 | 1.81195700  |
| H | 0.56558300  | -3.75124600 | 2.88653700  |
| H | 1.98511900  | -4.56004600 | 2.16896400  |
| H | 0.99311900  | -5.42092600 | 3.37311700  |
| H | 1.97805500  | 6.02314500  | 0.96812400  |
| H | 1.75705100  | 4.72035200  | 2.18259300  |
| H | 1.22109200  | 6.38361600  | 2.53685700  |
| H | 0.07555300  | 6.93080900  | -0.21090700 |
| H | -1.58303600 | 6.45340500  | 0.24231600  |
| H | -0.58353900 | 7.38862300  | 1.39313100  |
| H | -1.92953100 | 4.77280400  | 2.00211900  |
| H | -0.52273400 | 3.97062000  | 2.75184800  |
| H | -0.88077300 | 5.68856200  | 3.11133400  |

|   |             |             |             |
|---|-------------|-------------|-------------|
| H | -6.75218700 | 1.84797000  | 0.23518900  |
| H | -5.69556900 | 1.89291700  | 1.68245700  |
| H | -7.33467700 | 1.20708800  | 1.79323300  |
| H | -7.26957000 | -0.26845200 | -0.83825000 |
| H | -6.75333500 | -1.80381300 | -0.08941500 |
| H | -7.94636900 | -0.76991600 | 0.74486700  |
| H | -4.85279700 | -0.18142700 | 2.63044700  |
| H | -5.26895400 | -1.75085900 | 1.89973400  |
| H | -6.53516400 | -0.78808300 | 2.71109700  |
| O | 1.94038300  | -0.73551100 | 1.83422700  |
| H | 2.53674900  | -1.11505700 | 1.17092100  |
| H | 1.07660400  | -0.53338200 | 1.35283500  |
| O | -2.10054600 | -1.63399900 | 2.42066700  |
| H | -1.56992800 | -1.89312000 | 1.65200400  |
| H | -2.25507700 | -0.67150900 | 2.30247500  |
| O | -2.02670000 | 1.13513500  | 1.97880100  |
| H | -2.75107700 | 1.62593400  | 1.56983400  |
| H | -1.38280500 | 0.91362600  | 1.25046600  |
| O | 2.28949300  | 1.97405900  | 2.20423400  |
| H | 1.78018300  | 2.31306100  | 1.45271800  |
| H | 2.29668700  | 0.99472600  | 2.08389900  |
| O | -0.05635800 | 1.83655700  | -3.20389600 |
| O | -1.30567300 | 1.35740900  | 4.71594000  |
| H | -1.30314200 | 0.39839400  | 4.95095000  |
| H | -1.55485600 | 1.39502400  | 3.77059900  |
| O | 1.70268300  | -1.01348800 | 4.62290000  |
| H | 1.83503200  | -1.06029800 | 3.65377500  |
| H | 1.71783700  | -0.05080300 | 4.84022400  |
| O | 1.42632100  | 1.75986700  | 4.86826100  |
| H | 0.43980500  | 1.73457700  | 4.85671800  |
| H | 1.71001100  | 2.01442700  | 3.96567200  |
| O | -1.02071000 | -1.40419800 | 5.00300900  |
| H | -0.03710900 | -1.38711800 | 4.92093800  |
| H | -1.37235600 | -1.65519700 | 4.12315500  |

[MnL(O<sub>2</sub>)(H<sub>2</sub>O)]<sup>2+</sup>-8H<sub>2</sub>O (in benzene)

Charge=2 S=5/2

SCF energy: -4064.73033495 Ha

|    |             |             |             |
|----|-------------|-------------|-------------|
| O  | 1.86005400  | -0.10633700 | -3.20801900 |
| O  | -0.14431100 | -1.92836100 | -3.18403100 |
| O  | -1.95513900 | 0.09573500  | -3.11105000 |
| O  | -0.04042200 | 0.11070200  | -5.46244900 |
| O  | 0.19488100  | -0.15742600 | -0.75406600 |
| Mn | -0.05454900 | -0.01139100 | -3.19979000 |



|   |             |             |             |
|---|-------------|-------------|-------------|
| C | 2.66211900  | -0.15397600 | -2.17085000 |
| C | -0.15369900 | -2.61141100 | -2.05830500 |
| C | 0.08211300  | 2.58340300  | -2.03887700 |
| C | -2.72337200 | 0.13019600  | -2.05135100 |
| H | -0.09453200 | 1.02278700  | -5.78417000 |
| H | 0.72654400  | -0.29714500 | -5.89136400 |
| O | -0.09474100 | 0.01157100  | 0.52520500  |
| C | 3.16775900  | 1.05430600  | -1.60727600 |
| C | 3.06757300  | -1.40977200 | -1.63531400 |
| C | 1.07373300  | -3.06133600 | -1.48286300 |
| C | -1.38930900 | -2.92660900 | -1.42642200 |
| C | -1.12107500 | 3.03101400  | -1.41192700 |
| C | 1.34390600  | 2.90394800  | -1.45948800 |
| C | -3.22144700 | -1.08493200 | -1.49331500 |
| C | -3.12635100 | 1.38093600  | -1.50135400 |
| C | 4.18573400  | 0.98014700  | -0.65824500 |
| C | 2.64310100  | 2.40430300  | -2.09699800 |
| C | 4.10437200  | -1.44471200 | -0.69549900 |
| C | 2.41313800  | -2.69869900 | -2.13066900 |
| C | 1.03165100  | -3.87273100 | -0.35137400 |
| C | -1.38856300 | -3.74748200 | -0.29442800 |
| C | -2.71121200 | -2.42818100 | -2.01287700 |
| C | -1.03223400 | 3.85739700  | -0.29276200 |
| C | -2.48702300 | 2.67357400  | -2.00631800 |
| C | 1.38825800  | 3.74689900  | -0.34414800 |
| C | -4.23982000 | -1.01902700 | -0.54503300 |
| C | -4.17312900 | 1.40703000  | -0.57054900 |
| H | 4.59569700  | 1.90833600  | -0.27249400 |
| C | 4.67957300  | -0.25665200 | -0.22721800 |
| H | 3.42004800  | 3.15763100  | -1.92403700 |
| H | 2.48034400  | 2.33286000  | -3.17633500 |
| H | 4.45935700  | -2.41444200 | -0.36609900 |
| H | 3.11073200  | -3.52788000 | -1.96543300 |
| H | 2.25105500  | -2.60793700 | -3.20861700 |
| H | 1.97107300  | -4.24156200 | 0.04998200  |
| C | -0.18871500 | -4.22028700 | 0.24176200  |
| H | -2.34479100 | -4.01253500 | 0.13913600  |
| H | -3.47972400 | -3.18500300 | -1.81924600 |
| H | -2.58765100 | -2.34588200 | -3.09683700 |
| H | -1.95506200 | 4.23050500  | 0.14163800  |
| C | 0.21012200  | 4.22364300  | 0.23807100  |
| H | -3.17571300 | 3.50261700  | -1.80690700 |
| H | -2.36830300 | 2.59138300  | -3.09100200 |
| H | 2.36196600  | 4.03259400  | 0.03519500  |

|   |             |             |             |
|---|-------------|-------------|-------------|
| H | -4.65136300 | -1.95136900 | -0.17103100 |
| C | -4.74586300 | 0.21375000  | -0.11416500 |
| H | -4.54097800 | 2.37437000  | -0.24657200 |
| N | 5.85225300  | -0.26536400 | 0.72863800  |
| N | -0.17429700 | -5.17150700 | 1.41761100  |
| N | 0.24157700  | 5.20789600  | 1.38650800  |
| N | -5.94759000 | 0.20666700  | 0.80546700  |
| C | 5.47237700  | 0.40032000  | 2.03766000  |
| C | 6.33351700  | -1.65777700 | 1.05259700  |
| C | 7.01987500  | 0.47742000  | 0.10777600  |
| C | -1.54638500 | -5.39002200 | 2.01008400  |
| C | 0.35333000  | -6.51954200 | 0.96903400  |
| C | 0.70685300  | -4.63141900 | 2.52602400  |
| C | 1.63465500  | 5.43997600  | 1.92235000  |
| C | -0.29776300 | 6.54458300  | 0.91578700  |
| C | -0.60128600 | 4.70514400  | 2.54229500  |
| C | -6.43562700 | 1.59287100  | 1.14652600  |
| C | -7.09825900 | -0.51497000 | 0.12818400  |
| C | -5.61413600 | -0.49574800 | 2.10708200  |
| H | 4.67965800  | -0.18488700 | 2.50312900  |
| H | 5.11501600  | 1.40877200  | 1.84159800  |
| H | 6.35374200  | 0.42776500  | 2.68027800  |
| H | 5.53439100  | -2.21339000 | 1.54125000  |
| H | 6.64475700  | -2.15387900 | 0.13416300  |
| H | 7.18152000  | -1.56575400 | 1.73085700  |
| H | 7.26897800  | -0.00769100 | -0.83585800 |
| H | 6.73583800  | 1.51265100  | -0.06862800 |
| H | 7.86430400  | 0.43494800  | 0.79745700  |
| H | -2.19053200 | -5.85018200 | 1.26241200  |
| H | -1.95210100 | -4.43399800 | 2.34172100  |
| H | -1.43479300 | -6.06207200 | 2.86089200  |
| H | -0.29537400 | -6.89321000 | 0.17699200  |
| H | 1.36718600  | -6.39796700 | 0.59248400  |
| H | 0.34829800  | -7.19911500 | 1.82300500  |
| H | 0.31179600  | -3.66722400 | 2.84235900  |
| H | 1.72276200  | -4.51568900 | 2.15675900  |
| H | 0.69194700  | -5.33940800 | 3.35585000  |
| H | 2.25385900  | 5.87411300  | 1.13857500  |
| H | 2.05026100  | 4.49436500  | 2.27087000  |
| H | 1.55605200  | 6.13938300  | 2.75459400  |
| H | 0.32523700  | 6.89130000  | 0.09102800  |
| H | -1.32465500 | 6.41556800  | 0.57795000  |
| H | -0.26072900 | 7.24946200  | 1.74796900  |
| H | -1.63141600 | 4.58756300  | 2.21489600  |

|   |             |             |             |
|---|-------------|-------------|-------------|
| H | -0.20201500 | 3.74624500  | 2.87147400  |
| H | -0.55102700 | 5.43666100  | 3.35007900  |
| H | -6.71543100 | 2.11062200  | 0.23010900  |
| H | -5.65369400 | 2.13737200  | 1.67386000  |
| H | -7.30566900 | 1.48771800  | 1.79409600  |
| H | -7.31388600 | -0.00491000 | -0.81038000 |
| H | -6.81235200 | -1.54635300 | -0.06559400 |
| H | -7.96459200 | -0.48576000 | 0.79071300  |
| H | -4.81595000 | 0.05518600  | 2.60365300  |
| H | -5.28323300 | -1.50982800 | 1.89476200  |
| H | -6.50925000 | -0.51482600 | 2.73075600  |
| O | 2.02418300  | -0.85143100 | 1.78253600  |
| H | 2.59321300  | -1.20622900 | 1.08415400  |
| H | 1.15192500  | -0.62272800 | 1.33124900  |
| O | -2.07584300 | -1.80462000 | 2.23456300  |
| H | -1.52749700 | -1.96667900 | 1.45185900  |
| H | -2.26096000 | -0.84142900 | 2.20064400  |
| O | -2.10019500 | 0.97820700  | 1.89069800  |
| H | -2.81991700 | 1.33573200  | 1.35360200  |
| H | -1.35871200 | 0.77650000  | 1.24815900  |
| O | 2.28061000  | 1.87674600  | 2.14011500  |
| H | 1.72582100  | 2.14386000  | 1.39150500  |
| H | 2.34622800  | 0.89693700  | 2.05731900  |
| O | 0.02784800  | 1.91407100  | -3.17084800 |
| O | -1.37720200 | 1.19632500  | 4.62433500  |
| H | -1.36418400 | 0.23555900  | 4.85437600  |
| H | -1.67097200 | 1.24103200  | 3.69457300  |
| O | 1.69218900  | -1.16148300 | 4.56459600  |
| H | 1.87515400  | -1.19429500 | 3.60485000  |
| H | 1.69198500  | -0.20175500 | 4.79729300  |
| O | 1.35878800  | 1.59816300  | 4.80181500  |
| H | 0.37210600  | 1.57411800  | 4.78818200  |
| H | 1.64959700  | 1.87161600  | 3.91013100  |
| O | -1.03560700 | -1.56055500 | 4.86524100  |
| H | -0.04918500 | -1.53760900 | 4.82382300  |
| H | -1.35375000 | -1.82049700 | 3.97877400  |
